# Supplementary material
Source: PubMed Central journal article supplement (PMC4557203)
Supplement: NIHMS717592-supplement-Supplementary_Data.pdf [file NIHMS717592-supplement-Supplementary_Data.pdf]

## Supplementary Online Content

Van Allen EM, Lui VWY, Egloff AM, et al. Genomic correlate of exceptional erlotinib response in head and neck squamous cell carcinoma. *JAMA Oncol.* Published online March 5, 2015. doi:10.1001/jamaoncol.2015.34

### **eMethods**

**eFigure 1.** MAPK1 and Erlotinib Sensitivity in HNSCC Cell Lines

**eFigure 2.** Expression of MAPK1E322K Increased Erlotinib Sensitivity in HNSCC Cells

**eFigure 3.** Erlotinib Sensitivity Was Abrogated by ERK2 Knockdown in HSC-6 (MAPK1 E332K) Cells

**eTable 1.** Complete Listing of Somatic Alterations in the Exome

**eTable 2.** Exome Somatic Alteration COSMIC Mutations and Pathways

**eTable 3.** Gene-Level Depth of Coverage

**eTable 4.** Coverage by Intervals Across the Exome

### **eReferences**

This supplementary material has been provided by the authors to give readers additional information about their work.

## **eMethods**

Patient enrollment: Patient data, including treatment history, smoking status, tumor histology, anatomical site, and stage were obtained through the University of Pittsburgh Head and Neck SPORE neoplasm virtual repository<sup>1</sup>. The patient samples and clinical data were collected using protocols approved by the Institutional Review Boards of the University of Pittsburgh and the Broad Institute of MIT and Harvard.

DNA extraction and exome sequencing: Hematoxylin and eosin stained slides were cut from frozen tissue blocks and examined by a board-certified pathologist to select high-density cancer foci and ensure high purity of cancer DNA. Biopsy cores were taken from the corresponding frozen tissue block for DNA extraction. DNA was extracted and quantified using Picogreen dsDNA Quantitation Reagent (Invitrogen). DNA was stored at -20 degrees Celsius. Whole exome capture libraries were constructed from 100ng of DNA from tumor and normal tissue after sample shearing, end repair, and phosphorylation and ligation to barcoded sequencing adaptors. Ligated DNA was size selected for lengths between 200-350 bp and subjected to exonic hybrid capture using SureSelect v2 Exome bait (Agilent). The sample was multiplexed and sequenced using Illumina HiSeq technology for a mean target exome coverage of 85X in the tumor sample and 183X in the germline sample.

Sequence data processing: Exomes sequence data processing and analysis were performed using pipelines at the Broad Institute. A BAM file aligned to the hg19 human genome build was produced using Illumina sequencing reads for the tumor and normal sample and the Picard pipeline. The BAM was uploaded into the Firehose pipeline (<http://www.broadinstitute.org/cancer/cga/Firehose>) for managing intermediate analysis files executed by GenePattern.

© 2015 American Medical Association. All rights reserved.

Sequencing quality control: Sequencing data was incorporated into quality control modules in Firehose to compare the tumor and normal genotypes and ensure concordance between samples. Cross-contamination between samples from other individuals sequenced in the same flow cell was monitored with the ContEst algorithm<sup>2</sup>.

Alteration calling, annotation, and prioritization: The MuTect algorithm was applied to identify somatic single-nucleotide variants in targeted exons<sup>3</sup>. Indelocator (<http://www.broadinstitute.org/cancer/cga/indelocator>) was applied to identify small insertions or deletions. Copy ratios were calculated for each hybrid capture bait by dividing the tumor coverage by the median coverage obtained in a set of reference normal samples<sup>4</sup>. The resulting copy ratios were segmented using the circular binary segmentation algorithm<sup>5</sup>. Alterations were annotated using Oncotator (<http://www.broadinstitute.org/cancer/cga/oncotator>), and heuristics were applied to nominate clinically and biologically relevant alterations for individual patient samples using PHIAL<sup>6</sup>. All alterations nominated by PHIAL were manually reviewed in the Integrated Genomics Viewer (IGV)<sup>7</sup>. In addition, all sequencing reads for *EGFR* were manually reviewed in IGV, including locations of known *EGFR* hotspot activating mutations<sup>8</sup>.

Human Papilloma Virus (HPV) Detection: Using *in situ* hybridization - An HPV pan-specific DNA probe (Dako, Wide Spectrum HPV DNA Probe Cocktail, Biotinylated) was applied to formalin-fixed paraffin-embedded tissue blocks from the patient tumor. This probe detects HPV subtypes 6, 11, 16, 18, 31, 33, 35, 45, 51, and 51. A tumor with punctuate nuclear staining is scored as HPV-positive.

Cell lines: HNSCC cell line CAL-33 was obtained from Dr. Gerard Milano (University of Nice, France), and FaDu cells were obtained from ATCC (Manassas, VA). The HSC-6 cell line (harboring endogenous *MAPK1*<sup>E322K</sup> mutation) was a kind gift from Prof. Johji Inazawa (Tokyo Medical and Dental University, Japan). All cell lines were maintained in Dulbecco's Modified Eagle Medium (DMEM) supplemented with 10% fetal bovine serum (FBS) (Invitrogen, Carlsbad, CA), penicillin (100 U/ml)/streptomycin (100 µg/ml) at 37°C in a humidified atmosphere of 5% CO<sub>2</sub>.

Retroviral Infection of HNSCC cells: Retroviruses were generated using the Platinum Retrovirus Expression Systems (Cell Biolabs, San Diego, CA) according to manufacturer's instructions. Briefly, Plat-A cells were transfected with 3 µg of retroviral vector carrying the gene of interest (pMXs-puro-EGFP as control, pMXs-puro-*MAPK1* WT, pMXs-puro-*MAPK1*<sup>E322K</sup> mutant). Three days after transfection, fresh retroviruses (in the supernatant of the Plat-A cells) were collected by centrifugation at 1,500 rpm for 5 mins at 4°C. Cell debris was removed by filtering through a 0.45 µm syringe filter. Fresh retroviruses were used for infection of FaDu cells. FaDu cells were plated at 20% confluency in a T25 flask one day before infection. Infection of HNSCC cells was performed by adding 1.5 ml of retrovirus to the cells containing 2.5 ml of complete culture media. Then, 12 µl of polybrene (4 µg/µl, Sigma-Aldrich, St. Louis, MO) was added to the cells with gentle mixing. Cells were then incubated at 37°C and 5% CO<sub>2</sub> for an additional 48-72 hours, and the infection medium was replaced with fresh complete medium. Expression of the gene of interest and alteration of the signaling pathway was assessed by Western blotting.

MAPK1 siRNA Knockdown: HSC-6 cells were transfected with either MAPK1-targeting siRNA or control siRNA (catalog numbers SR303751C and SR30004, respectively,

© 2015 American Medical Association. All rights reserved.

Origene Technologies, Inc.) using siTran (Origene Technologies, Inc.) according to manufacturer's instructions. 48h after transfection, cells were transferred to 12-well plates and allowed to attach for 24h before erlotinib treatment and cell viability assessment.

**Senescence Assay:** Cells were treated with vehicle (DMSO) or erlotinib (0.5 $\mu$ M and 5 $\mu$ M) for 48h after which b-galactosidase activity at pH 6 was detected in senescent cells by light microscopy (100x) following staining using the senescence staining kit (Cell Signaling Technology, USA). Number of senescent cells and total number of cells per field were analyzed for  $\geq 5$  fields for each cell type and treatment condition. Average percent of senescent cells from a representative of 3 independent experiments is presented.

**Trypan Blue Exclusion Assay:** Cells were treated with vehicle (DMSO) or erlotinib (0.5 $\mu$ M and 5 $\mu$ M) for 48h then harvested by trypsinization for cell counting. Viable cells upon trypan blue staining (Invitrogen, Carlsbad, CA) were counted under light microscope. Triplicate wells were counted each time. Cumulative data from 2 independent experiments were analyzed for statistical significance.

**Western blotting:** Primary antibodies for phospho-p42/44-MAPK, p42/44-MAPK and phospho-EGFR(Y1068) were from Cell Signaling Technology, Inc. (Boston, MA), while EGFR antibody was obtained from BD biosciences (San Jose, CA). Anti-tubulin antibody was from Abcam (Cambridge, MA) and secondary antibodies from BioRad (Hercules, CA).

eFigure 1. MAPK1 and Erlotinib Sensitivity in HNSCC Cell Lines

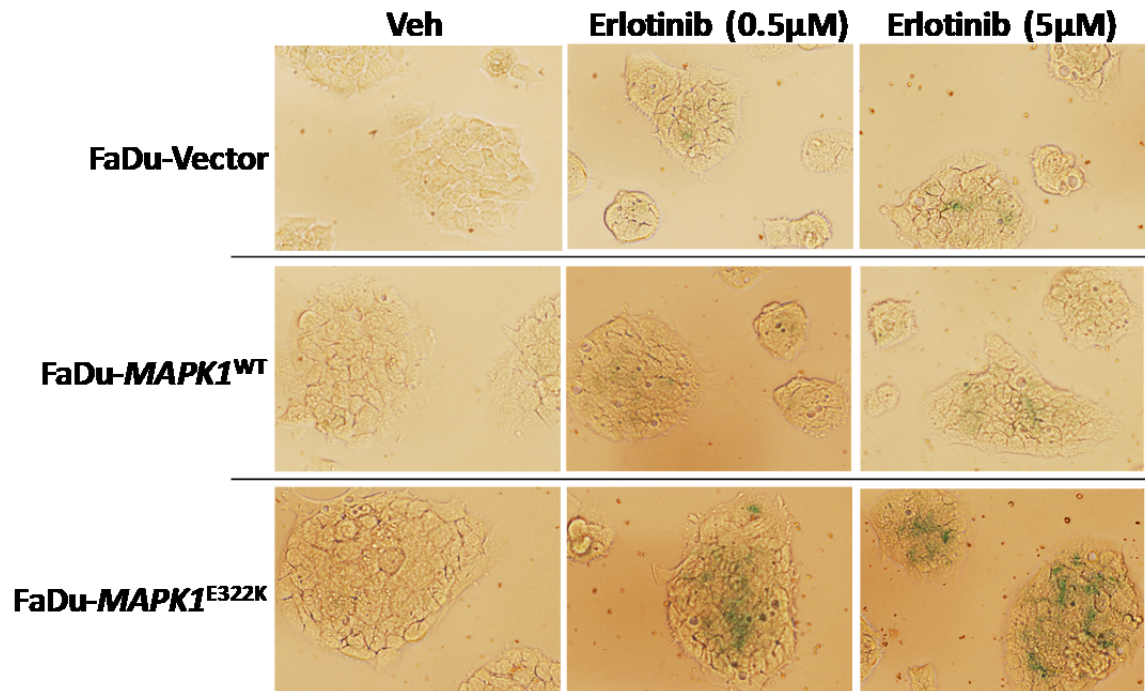

Representative pictures of senescence staining of stably transfected FaDu cells. FaDu-Vector, FaDu-MAPK1<sup>WT</sup> and FaDu-MAPK1<sup>E322K</sup> were stained for  $\beta$ -galactosidase activity at pH 6 following 48h erlotinib treatment. Staining was detected by light microscopy (pictured at 100x).

**eFigure 2. Expression of *MAPK1*<sup>E322K</sup> Increased Erlotinib Sensitivity in HNSCC Cells**

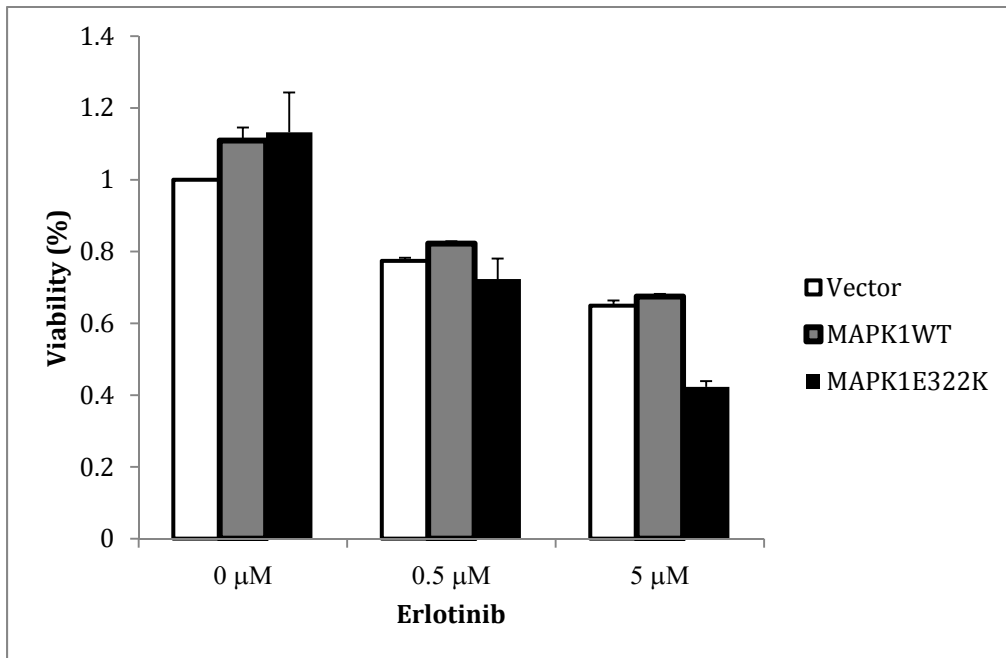

Stably transfected FaDu cells, FaDu-Vector, FaDu-*MAPK1*<sup>WT</sup> and FaDu-*MAPK1*<sup>E322K</sup>, were assessed for viability as measured by vital dye exclusion assay following 48h erlotinib treatment. Viability presented relative to vehicle treated vector transfected cells (\*\* denotes  $p < 0.005$ ; t-test).

**eFigure 3. Erlotinib Sensitivity Was Abrogated by ERK2 Knockdown in HSC-6 (*MAPK1*<sup>E332K</sup>) Cells**

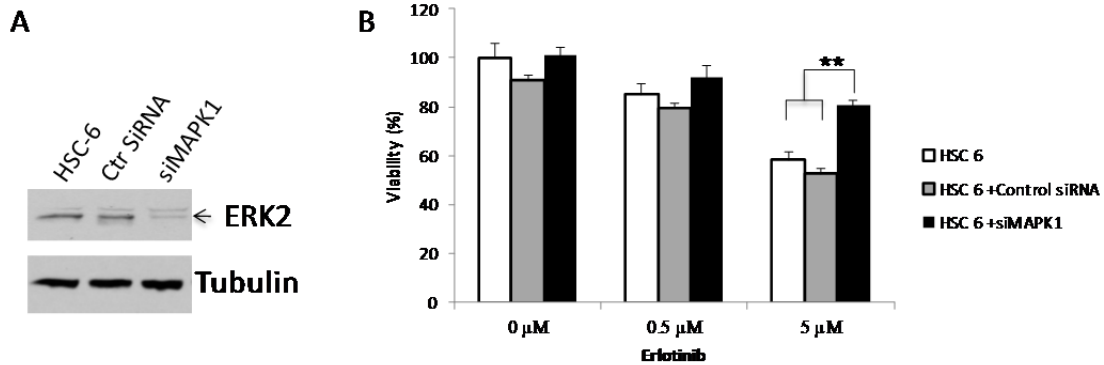

(A) siRNA targeting MAPK1 (ERK2) resulted in reduced ERK2 protein expression and (B) significantly reduced HSC-6 growth inhibition in response to 48h treatment with 5  $\mu$ M erlotinib as measured by vital dye exclusion assay (\*\* denotes  $p < 0.005$ ; t-test). Viability data are presented relative to parental HSC-6 cells without erlotinib treatment.



eTable 1. Complete Listing of Somatic Alterations in the Exome

| Gene    | Variant_Classification | Alteration     | Tumor_allele | Reference_allele | dbSNP_RS    | Chromosome | Start_position | End_position | Coverage | Allelic_fraction | Number_of_Probes | Segment_Mean | In_Segment |
|---------|------------------------|----------------|--------------|------------------|-------------|------------|----------------|--------------|----------|------------------|------------------|--------------|------------|
| TP53    | Nonsense_Mutation      | p.Y236*        | T            | G                |             | 17         | 7577573        | 7577573      | 54       | 0.241            | N                | NA           | NA         |
| ABL2    | Missense_Mutation      | p.G1028S       | T            | C                |             | 1          | 179077320      | 179077320    | 80       | 0.125            | N                | NA           | NA         |
| ARID1A  | Missense_Mutation      | p.Y1279C       | G            | A                |             | 1          | 27099957       | 27099957     | 20       | 0.150            | N                | NA           | NA         |
| MAPK1   | Missense_Mutation      | p.E322K        | T            | C                |             | 22         | 22127164       | 22127164     | 88       | 0.125            | N                | NA           | NA         |
| ABCC2   | Splice_Site            | p.M1139_splice | A            | G                |             | 10         | 101595847      | 101595847    | 32       | 0.125            | N                | NA           | NA         |
| C8B     | Missense_Mutation      | p.P189Q        | T            | G                |             | 1          | 57417821       | 57417821     | 217      | 0.129            | N                | NA           | NA         |
| CD209   | Missense_Mutation      | p.R129W        | A            | G                | rs146082308 | 19         | 7810767        | 7810767      | 115      | 0.043            | N                | NA           | NA         |
| CHD4    | Missense_Mutation      | p.R813H        | T            | C                |             | 12         | 6702658        | 6702658      | 123      | 0.065            | N                | NA           | NA         |
| CHGB    | Missense_Mutation      | p.N172H        | C            | A                |             | 20         | 5903304        | 5903304      | 36       | 0.167            | N                | NA           | NA         |
| COL11A1 | Missense_Mutation      | p.E286V        | A            | T                |             | 1          | 103491812      | 103491812    | 123      | 0.146            | N                | NA           | NA         |
| DDX17   | Missense_Mutation      | p.E416K        | T            | C                |             | 22         | 38890105       | 38890105     | 94       | 0.106            | N                | NA           | NA         |
| EPS8L2  | Copy Number            | Deleted        | NA           | NA               | NA          | 11         | 703152         | 710488       | NA       | NA               | 2                | -1.1004      | FALSE      |
| GAPVD1  | Missense_Mutation      | p.R963C        | T            | C                |             | 9          | 128103465      | 128103465    | 51       | 0.176            | N                | NA           | NA         |
| GTF3C4  | Missense_Mutation      | p.H478Q        | A            | C                | rs147481161 | 9          | 135554440      | 135554440    | 63       | 0.127            | N                | NA           | NA         |
| MUC16   | Missense_Mutation      | p.L10956P      | G            | A                |             | 19         | 9048764        | 9048764      | 98       | 0.051            | N                | NA           | NA         |
| MUC16   | Missense_Mutation      | p.F10954L      | G            | A                |             | 19         | 9048771        | 9048771      | 98       | 0.051            | N                | NA           | NA         |
| NDUFC1  | Missense_Mutation      | p.E33K         | T            | C                |             | 4          | 140216271      | 140216271    | 73       | 0.055            | N                | NA           | NA         |

|          |                   |          |    |    |             |    |           |           |     |       |   |         |               |
|----------|-------------------|----------|----|----|-------------|----|-----------|-----------|-----|-------|---|---------|---------------|
| NID2     | Missense_Mutation | p.P716Q  | T  | G  | rs111540553 | 14 | 52505575  | 52505575  | 160 | 0.044 | N | NA      | NA            |
| PDE2A    | Missense_Mutation | p.P40Q   | T  | G  |             | 11 | 72353323  | 72353323  | 4   | 0.500 | N | NA      | NA            |
| POLA2    | Missense_Mutation | p.T356S  | T  | A  |             | 11 | 65055246  | 65055246  | 92  | 0.054 | N | NA      | NA            |
| RPL9     | Missense_Mutation | p.L144I  | T  | A  |             | 4  | 39456526  | 39456526  | 69  | 0.058 | N | NA      | NA            |
| SGCE     | Missense_Mutation | p.S325W  | C  | G  |             | 7  | 94230021  | 94230021  | 45  | 0.089 | N | NA      | NA            |
| SOX3     | Missense_Mutation | p.K213R  | C  | T  |             | X  | 139586588 | 139586588 | 20  | 0.150 | N | NA      | NA            |
| ST14     | Missense_Mutation | p.P452T  | A  | C  |             | 11 | 130066595 | 130066595 | 88  | 0.057 | N | NA      | NA            |
| TTC14    | Missense_Mutation | p.R593M  | T  | G  |             | 3  | 180327795 | 180327795 | 290 | 0.090 | N | NA      | NA            |
| ACER2    | Missense_Mutation | p.R119W  | T  | C  |             | 9  | 19424829  | 19424829  | 53  | 0.245 | N | NA      | NA            |
| ATG7     | Missense_Mutation | p.R481Q  | A  | G  |             | 3  | 11400049  | 11400049  | 43  | 0.070 | N | NA      | NA            |
| BCMO1    | Missense_Mutation | p.A463V  | T  | C  |             | 16 | 81320985  | 81320985  | 53  | 0.113 | N | NA      | NA            |
| C17orf47 | Missense_Mutation | p.K378N  | G  | T  |             | 17 | 56620414  | 56620414  | 29  | 0.138 | N | NA      | NA            |
| C6orf211 | Missense_Mutation | p.V52M   | A  | G  |             | 6  | 151779469 | 151779469 | 204 | 0.137 | N | NA      | NA            |
| COL22A1  | Missense_Mutation | p.G753R  | T  | C  |             | 8  | 139734323 | 139734323 | 4   | 0.500 | N | NA      | NA            |
| CYP8B1   | Missense_Mutation | p.P398T  | T  | G  |             | 3  | 42916117  | 42916117  | 107 | 0.103 | N | NA      | NA            |
| DEAF1    | Copy Number       | Deleted  | NA | NA | NA          | 11 | 703152    | 710488    | NA  | NA    | 2 | -1.1004 | FA<br>LS<br>E |
| DHX37    | Missense_Mutation | p.R327Q  | T  | C  |             | 12 | 125459965 | 125459965 | 57  | 0.140 | N | NA      | NA            |
| EPHA6    | Missense_Mutation | p.H1119Y | T  | C  |             | 3  | 97467507  | 97467507  | 51  | 0.137 | N | NA      | NA            |
| FAM151B  | Nonsense_Mutation | p.Q197*  | T  | C  |             | 5  | 79817875  | 79817875  | 100 | 0.100 | N | NA      | NA            |
| FAM198B  | Missense_Mutation | p.E300Q  | G  | C  |             | 4  | 159091630 | 159091630 | 77  | 0.091 | N | NA      | NA            |
| FAM71C   | Missense_Mutation | p.P83T   | A  | C  |             | 12 | 100042199 | 100042199 | 111 | 0.099 | N | NA      | NA            |

© 2015 American Medical Association. All rights reserved.

|          |                        |          |    |     |    |    |           |           |     |       |   |         |       |
|----------|------------------------|----------|----|-----|----|----|-----------|-----------|-----|-------|---|---------|-------|
| GPATCH8  | Missense_Mutation      | p.G767D  | T  | C   |    | 17 | 42477145  | 42477145  | 67  | 0.060 | N | NA      | NA    |
| NCOA6    | Missense_Mutation      | p.P749L  | A  | G   |    | 20 | 33337752  | 33337752  | 122 | 0.115 | N | NA      | NA    |
| NLRP13   | Missense_Mutation      | p.A883P  | G  | C   |    | 19 | 56413543  | 56413543  | 24  | 0.125 | N | NA      | NA    |
| PCDHA4   | Missense_Mutation      | p.A642T  | A  | G   |    | 5  | 140188696 | 140188696 | 99  | 0.131 | N | NA      | NA    |
| PDE6C    | Missense_Mutation      | p.V9M    | A  | G   |    | 10 | 95372507  | 95372507  | 91  | 0.066 | N | NA      | NA    |
| SSX7     | Frame_Shift_Del        | p.P127fs | -  | T   |    | X  | 52677396  | 52677396  | 122 | 0.172 | N | NA      | NA    |
| TBC1D10A | Missense_Mutation      | p.R107Q  | T  | C   |    | 22 | 30695530  | 30695530  | 39  | 0.128 | N | NA      | NA    |
| TBCEL    | Nonsense_Mutation      | p.Q313*  | T  | C   |    | 11 | 120930775 | 120930775 | 65  | 0.077 | N | NA      | NA    |
| TGIF2LY  | Translation_Start_Site |          | T  | C   |    | Y  | 3447268   | 3447268   | 14  | 0.357 | N | NA      | NA    |
| TMEM80   | Copy Number            | Deleted  | NA | NA  | NA | 11 | 703152    | 710488    | N   | NA    | 2 | -1.1004 | FALSE |
| ZNF518A  | Frame_Shift_Del        | p.E296fs | -  | A   |    | 10 | 97916966  | 97916966  | 6   | 0.333 | N | NA      | NA    |
| ADAMTSL2 | Intron                 |          | -  | CA  |    | 9  | 136400505 | 136400506 | 6   | 0.333 | N | NA      | NA    |
| ANKS1B   | Silent                 | p.P410P  | T  | C   |    | 12 | 100048887 | 100048887 | 41  | 0.122 | N | NA      | NA    |
| APOBEC3H | Intron                 |          | T  | -   |    | 22 | 39497592  | 39497593  | 6   | 0.333 | N | NA      | NA    |
| C10orf79 | Silent                 | p.D1284D | A  | G   |    | 10 | 105906024 | 105906024 | 121 | 0.116 | N | NA      | NA    |
| CCDC18   | 3'UTR                  |          | -  | A   |    | 1  | 93744059  | 93744059  | 159 | 0.101 | N | NA      | NA    |
| CCDC88C  | Intron                 |          | -  | TC  |    | 14 | 91773333  | 91773334  | 7   | 0.429 | N | NA      | NA    |
| CNOT2    | Intron                 |          | T  | -   |    | 12 | 70739864  | 70739865  | 6   | 0.333 | N | NA      | NA    |
| ERGIC2   | Silent                 | p.S351S  | A  | G   |    | 12 | 29494685  | 29494685  | 204 | 0.093 | N | NA      | NA    |
| FLJ40330 | Intron                 |          | -  | AGA |    | 2  | 89102192  | 89102194  | 6   | 0.333 | N | NA      | NA    |
| FOXP2    | Intron                 |          | -  | GGT |    | 7  | 114036725 | 114036727 | 6   | 0.333 | N | NA      | NA    |
| GFOD1    | Silent                 | p.I79I   | T  | G   |    | 6  | 13486886  | 13486886  | 61  | 0.066 | N | NA      | NA    |

© 2015 American Medical Association. All rights reserved.

|                  |        |         |            |        |                             |   |                |               |             |           |        |    |    |
|------------------|--------|---------|------------|--------|-----------------------------|---|----------------|---------------|-------------|-----------|--------|----|----|
| HLA-B            | Intron |         | -          | A      |                             | 6 | 31245<br>032   | 31245<br>032  | 3<br>3      | 0.2<br>73 | N<br>A | NA | NA |
| HSPG2            | Intron |         | -          | A      |                             | 1 | 22198<br>881   | 22198<br>881  | 6           | 0.3<br>33 | N<br>A | NA | NA |
| KLF8             | Intron |         | -          | A<br>G |                             | X | 56296<br>838   | 56296<br>839  | 6           | 0.3<br>33 | N<br>A | NA | NA |
| KNG1             | Intron |         | CCA        | -      |                             | 3 | 18643<br>5622  | 18643<br>5623 | 6           | 0.3<br>33 | N<br>A | NA | NA |
| LATS1            | 3'UTR  |         | T          | C      |                             | 6 | 14998<br>2769  | 14998<br>2769 | 1<br>9      | 0.2<br>11 | N<br>A | NA | NA |
| LOC100<br>286793 | RNA    |         | C          | G      | rs140521978                 | 1 | 14374<br>4411  | 14374<br>4411 | 6           | 0.5<br>00 | N<br>A | NA | NA |
| MARCO            | Intron |         | CCC<br>TGC | -      |                             | 2 | 11973<br>4097  | 11973<br>4098 | 6           | 0.5<br>00 | N<br>A | NA | NA |
| NHLRC2           | Silent | p.P144P | C          | T      |                             | 1 | 11563<br>06380 | 11563<br>6380 | 9<br>3      | 0.1<br>40 | N<br>A | NA | NA |
| NOL8             | Intron |         | -          | A      |                             | 9 | 95062<br>034   | 95062<br>034  | 6           | 0.5<br>00 | N<br>A | NA | NA |
| NSMAF            | Intron |         | CG         | -      | rs141516286;r<br>s151015572 | 8 | 59535<br>859   | 59535<br>860  | 4<br>7      | 0.1<br>70 | N<br>A | NA | NA |
| PCDHB1<br>9P     | 3'UTR  |         | T          | C      |                             | 5 | 14062<br>1220  | 14062<br>1220 | 7<br>9      | 0.0<br>63 | N<br>A | NA | NA |
| PDCL3            | Intron |         | -          | T      |                             | 2 | 10118<br>5540  | 10118<br>5540 | 7           | 0.4<br>29 | N<br>A | NA | NA |
| PIGK             | Intron |         | -          | AAAT   |                             | 1 | 77595<br>400   | 77595<br>403  | 1<br>1      | 0.3<br>64 | N<br>A | NA | NA |
| PION             | Silent | p.L283L | A          | G      |                             | 7 | 77003<br>411   | 77003<br>411  | 1<br>3<br>2 | 0.0<br>76 | N<br>A | NA | NA |
| PLA1A            | 3'UTR  |         | G          | T      | rs139478101                 | 3 | 11934<br>8360  | 11934<br>8360 | 8           | 0.2<br>50 | N<br>A | NA | NA |
| PRPF40<br>A      | Intron |         | -          | A      |                             | 2 | 15351<br>5881  | 15351<br>5881 | 6           | 0.3<br>33 | N<br>A | NA | NA |
| PXDNL            | Intron |         | -          | G      | rs113739338                 | 8 | 52526<br>045   | 52526<br>045  | 6           | 0.3<br>33 | N<br>A | NA | NA |
| REG3A            | 5'UTR  |         | A          | G      | rs56413330                  | 2 | 79386<br>560   | 79386<br>560  | 3<br>4      | 0.1<br>18 | N<br>A | NA | NA |
| RPF2             | Intron |         | AAA<br>C   | -      | rs147892015                 | 6 | 11130<br>6044  | 11130<br>6045 | 6           | 0.5<br>00 | N<br>A | NA | NA |
| SF3B4            | Silent | p.S277S | T          | C      |                             | 1 | 14989<br>7810  | 14989<br>7810 | 3<br>1      | 0.1<br>29 | N<br>A | NA | NA |
| SMAD9            | 3'UTR  |         | T          | C      |                             | 1 | 37422<br>3731  | 37422<br>731  | 5<br>3      | 0.1<br>13 | N<br>A | NA | NA |
| STK4             | Intron |         | T          | -      |                             | 2 | 43623<br>0633  | 43623<br>634  | 6           | 0.5<br>00 | N<br>A | NA | NA |
| SUMF1            | Intron |         | G          | -      | rs144078985                 | 3 | 43154<br>30    | 43154<br>31   | 7           | 0.4<br>29 | N<br>A | NA | NA |
| SYMPK            | Intron |         | -          | AGGG   |                             | 1 | 46320<br>9240  | 46320<br>243  | 6           | 0.3<br>33 | N<br>A | NA | NA |
| TAC1             | Intron |         | -          | G      |                             | 7 | 97362          | 97362         | 6           | 0.3       | N      | NA | NA |

© 2015 American Medical Association. All rights reserved.

|         |         |        |    |             |                            |                         |               |             |           |        |    |    |
|---------|---------|--------|----|-------------|----------------------------|-------------------------|---------------|-------------|-----------|--------|----|----|
|         |         |        |    |             |                            | 958                     | 958           |             | 33        | A      |    |    |
| TARS    | Intron  |        | -  | TT          | rs111754118                | 5<br>33453<br>369       | 33453<br>370  | 8           | 0.3<br>75 | N<br>A | NA | NA |
| TBL3    | Intron  |        | C  | A           |                            | 1<br>6<br>20261<br>80   | 20261<br>80   | 2<br>2      | 0.2<br>73 | N<br>A | NA | NA |
| TNKS    | Intron  |        | G  | -           | rs149114426                | 8<br>95661<br>57        | 95661<br>58   | 6           | 0.6<br>67 | N<br>A | NA | NA |
| Unknown | RNA     |        | G  | A           | rs926027                   | 1<br>4<br>22192<br>106  | 22192<br>106  | 1<br>8<br>6 | 0.0<br>32 | N<br>A | NA | NA |
| Unknown | 5'Flank |        | T  | G           |                            | 1<br>5<br>10230<br>4722 | 10230<br>4722 | 2<br>1      | 0.1<br>43 | N<br>A | NA | NA |
| Unknown | IGR     |        | -  | A<br>G<br>G |                            | 1<br>0<br>29543<br>272  | 29543<br>274  | 6           | 0.3<br>33 | N<br>A | NA | NA |
| Unknown | IGR     |        | -  | C<br>C      |                            | 1<br>0<br>52467<br>359  | 52467<br>360  | 6           | 0.3<br>33 | N<br>A | NA | NA |
| Unknown | IGR     |        | -  | T<br>G      |                            | 1<br>6<br>32399<br>771  | 32399<br>772  | 1<br>0      | 0.4<br>00 | N<br>A | NA | NA |
| Unknown | IGR     |        | -  | A           |                            | 1<br>8<br>49139<br>477  | 49139<br>477  | 9           | 0.3<br>33 | N<br>A | NA | NA |
| Unknown | IGR     |        | -  | C           | rs60129451                 | 2<br>23277<br>0987      | 23277<br>0987 | 6           | 0.3<br>33 | N<br>A | NA | NA |
| Unknown | IGR     |        | -  | G<br>G<br>A | rs71327417                 | 2<br>0<br>58657<br>085  | 58657<br>087  | 6           | 0.3<br>33 | N<br>A | NA | NA |
| Unknown | IGR     |        | -  | T<br>A      | rs79867563;rs<br>117711458 | 7<br>57659<br>470       | 57659<br>471  | 6           | 0.3<br>33 | N<br>A | NA | NA |
| Unknown | IGR     |        | CT | -           |                            | 8<br>20900<br>645       | 20900<br>646  | 6           | 0.3<br>33 | N<br>A | NA | NA |
| ZNF679  | Silent  | p.K78K | A  | G           |                            | 7<br>63721<br>279       | 63721<br>279  | 2<br>4      | 0.2<br>08 | N<br>A | NA | NA |

This table provides information about the point mutations, short insertion/deletions, and copy number alterations observed in this patient's tumor. Additional data regarding allelic fraction, segment mean, and coverage is provided for these alterations.

eTable 2. Exome Somatic Alteration COSMIC Mutations and Pathways

| Gene   | Alteration     | Pathways                                                                                                                                                                                                                                                                                                                                                                                             | COSMIC_overlapping_mutations                                                                                                                                                                                                                                                                                   | COSMIC_total_alterations_in_gene | UniProt_Region                                                                                                             |
|--------|----------------|------------------------------------------------------------------------------------------------------------------------------------------------------------------------------------------------------------------------------------------------------------------------------------------------------------------------------------------------------------------------------------------------------|----------------------------------------------------------------------------------------------------------------------------------------------------------------------------------------------------------------------------------------------------------------------------------------------------------------|----------------------------------|----------------------------------------------------------------------------------------------------------------------------|
| TP53   | p.Y236*        |                                                                                                                                                                                                                                                                                                                                                                                                      | p.Y236C(46) p.Y236N(12) p.Y236H(9) p.Y236*(9) p.O?(7) p.Y236D(6) p.Y236del(4) p.Y236S(3) p.Y236Y(2) p.Y236fs*4(2) p.Y236_M237delYM(1) p.Y236_M237insXX(1) p.Y236fs*5(1) p.H233fs*6(1) p.N235_Y236delNY(1) p.Y236_M243delYMCNSSCM(1) p.V225fs*23(1) p.I232_Y236delIHNY(1) p.Y236_M237>*L(1) p.H233_C242del10(1) | 22245                            | Required for interaction with FBXO42.    Interaction with HIPK1 (By similarity).   Interaction with AXIN1 (By similarity). |
| ABL2   | p.G1028S       |                                                                                                                                                                                                                                                                                                                                                                                                      |                                                                                                                                                                                                                                                                                                                | 14                               | Pro-rich.   F-actin-binding (By similarity).                                                                               |
| ARID1A | p.Y1279C       |                                                                                                                                                                                                                                                                                                                                                                                                      |                                                                                                                                                                                                                                                                                                                | 142                              |                                                                                                                            |
| MAPK1  | p.E322K        | BIOCARTE_CDMAC_PATHWAY  <br>BIOCARTE_IGF1R_PATHWAY  <br>BIOCARTE_41BB_PATHWAY  <br>KEGG_THYROID_CANCER  <br>BIOCARTE_HER2_PATHWAY  <br>BIOCARTE_MET_PATHWAY  <br>KEGG_BLADDER_CANCER  <br>KEGG_NON_SMALL_CELL_LUNG_CANCER  <br>KEGG_COLORECTAL_CANCER  <br>KEGG_PANCREATIC_CANCER  <br>KEGG_ENDOMETRIAL_CANCER  <br>KEGG_RENAL_CELL_CARCINOMA  <br>KEGG_PROSTATE_CANCER  <br>KEGG_PATHWAYS_IN_CANCER | 3                                                                                                                                                                                                                                                                                                              |                                  |                                                                                                                            |
| ABCC2  | p.M1139_splice |                                                                                                                                                                                                                                                                                                                                                                                                      |                                                                                                                                                                                                                                                                                                                | 1                                |                                                                                                                            |
| C8B    | p.P189Q        |                                                                                                                                                                                                                                                                                                                                                                                                      |                                                                                                                                                                                                                                                                                                                | 4                                | MACPF.                                                                                                                     |

|          |           |    |    |                                                                 |
|----------|-----------|----|----|-----------------------------------------------------------------|
| CD209    | p.R129W   |    | 1  | Extracellular (Probable).  2.   7 X approximate tandem repeats. |
| CHD4     | p.R813H   |    | 2  | Helicase ATP-binding.                                           |
| CHGB     | p.N172H   |    | 6  |                                                                 |
| COL11A1  | p.E286V   |    | 12 | Nonhelical region.                                              |
| DDX17    | p.E416K   |    | 4  | Helicase C-terminal.                                            |
| EPS8L2   | Deleted   | NA | NA | NA                                                              |
| GAPVD1   | p.R963C   |    | 4  |                                                                 |
| GTF3C4   | p.H478Q   |    | 2  |                                                                 |
| MUC16    | p.L10956P |    | 57 | Thr-rich.   Extracellular (Potential).                          |
| MUC16    | p.F10954L |    | 57 | Thr-rich.   Extracellular (Potential).                          |
| NDUFC1   | p.E33K    |    | 0  |                                                                 |
| NID2     | p.P716Q   |    | 7  | Nidogen G2 beta-barrel.                                         |
| PDE2A    | p.P40Q    |    | 4  |                                                                 |
| POLA2    | p.T356S   |    | 0  |                                                                 |
| RPL9     | p.L144I   |    | 1  |                                                                 |
| SGCE     | p.S325W   |    | 1  | Cys-rich.   Helical; (Potential).                               |
| SOX3     | p.K213R   |    | 1  |                                                                 |
| ST14     | p.P452T   |    | 5  | Extracellular (Potential).   LDL-receptor class A 1.            |
| TTC14    | p.R593M   |    | 1  |                                                                 |
| ACER2    | p.R119W   |    | 2  | Cytoplasmic (Potential).                                        |
| ATG7     | p.R481Q   |    | 1  |                                                                 |
| BCMO1    | p.A463V   |    | 0  |                                                                 |
| C17orf47 | p.K378N   |    | 1  |                                                                 |
| C6orf211 | p.V52M    |    | 0  |                                                                 |
| COL22A1  | p.G753R   |    | 13 | Collagen-like 5.   Pro-rich.   Gly-rich.                        |
| CYP8B1   | p.P398T   |    | 2  |                                                                 |
| DEAF1    | Deleted   | NA | NA | NA                                                              |
| DHX37    | p.R327Q   |    | 1  | Helicase ATP-binding.                                           |

|              |          |    |    |                                                                                        |
|--------------|----------|----|----|----------------------------------------------------------------------------------------|
| EPHA6        | p.H1119Y |    | 16 | SAM.   Cytoplasmic (Potential).                                                        |
| FAM151B      | p.Q197*  |    | 0  |                                                                                        |
| FAM198B      | p.E300Q  |    | 0  | Extracellular (Potential).                                                             |
| FAM71C       | p.P83T   |    | 0  |                                                                                        |
| GPATCH8      | p.G767D  |    | 4  |                                                                                        |
| NCOA6        | p.P749L  |    | 7  | TBP/GTF2A-binding region.   NCOA1-binding region.   Gln-rich.   CREBBP-binding region. |
| NLRP13       | p.A883P  |    | 9  |                                                                                        |
| PCDHA4       | p.A642T  |    | 6  | Cadherin 6.   Extracellular (Potential).                                               |
| PDE6C        | p.V9M    |    | 4  |                                                                                        |
| SSX7         | p.P127fs |    | 1  |                                                                                        |
| TBC1D10A     | p.R107Q  |    | 1  |                                                                                        |
| TBCEL        | p.Q313*  |    | 1  |                                                                                        |
| TGIF2LY      |          |    | 0  |                                                                                        |
| TMEM80       | Deleted  | NA | NA | NA                                                                                     |
| ZNF518A      | p.E296fs |    | 1  |                                                                                        |
| ADAMTSL2     |          | NA | 1  | NA                                                                                     |
| ANKS1B       | p.P410P  |    | 0  |                                                                                        |
| APOBEC3H     |          | NA | 2  | NA                                                                                     |
| C10orf79     | p.D1284D |    | 0  |                                                                                        |
| CCDC18       |          | NA | 5  | NA                                                                                     |
| CCDC88C      |          | NA | 3  | NA                                                                                     |
| CNOT2        |          | NA | 0  | NA                                                                                     |
| ERGIC2       | p.S351S  |    | 1  | Cytoplasmic (Potential).                                                               |
| FLJ40330     |          | NA | 0  | NA                                                                                     |
| FOXP2        |          | NA | 8  | NA                                                                                     |
| GFOD1        | p.I79I   |    | 2  |                                                                                        |
| HLA-B        |          | NA | 0  | NA                                                                                     |
| HSPG2        |          | NA | 9  | NA                                                                                     |
| KLF8         |          | NA | 1  | NA                                                                                     |
| KNG1         |          | NA | 1  | NA                                                                                     |
| LATS1        |          |    | 6  |                                                                                        |
| LOC100286793 |          |    | 0  |                                                                                        |
| MARCO        |          | NA | 6  | NA                                                                                     |
| NHLRC2       | p.P144P  |    | 1  | Thioredoxin.                                                                           |
| NOL8         |          | NA | 1  | NA                                                                                     |
| NSMAF        |          | NA | 1  | NA                                                                                     |
| PCDHB19P     |          |    | 0  |                                                                                        |
| PDCL3        |          | NA | 0  | NA                                                                                     |
| PIGK         |          | NA | 3  | NA                                                                                     |
| PION         | p.L283L  |    | 1  |                                                                                        |



|         |         |    |   |       |
|---------|---------|----|---|-------|
| PLA1A   |         |    | 3 |       |
| PRPF40A |         | NA | 0 | NA    |
| PXDNL   |         | NA | 2 | NA    |
| REG3A   |         |    | 1 |       |
| RPF2    |         | NA | 2 | NA    |
| SF3B4   | p.S277S |    | 1 |       |
| SMAD9   |         |    | 0 |       |
| STK4    |         | NA | 2 | NA    |
| SUMF1   |         | NA | 1 | NA    |
| SYMPK   |         | NA | 1 | NA    |
| TAC1    |         | NA | 0 | NA    |
| TARS    |         | NA | 2 | NA    |
| TBL3    |         |    | 0 |       |
| TNKS    |         | NA | 7 | NA    |
| ZNF679  | p.K78K  |    | 1 | KRAB. |

This table provides contextual information about the patient exome somatic alterations including similar COSMIC mutations and implicated functional pathways.

eTable 3. Gene-Level Depth of Coverage

| <b>Gene</b> | <b>Total coverage</b> | <b>Average coverage (X)</b> |
|-------------|-----------------------|-----------------------------|
| ABL1        | 202739                | 57.21                       |
| ABL2        | 423709                | 114.45                      |
| ACVR1B      | 152952                | 81.23                       |
| AKT1        | 54075                 | 36.44                       |
| AKT2        | 105321                | 58.51                       |
| AKT3        | 123321                | 85.64                       |
| ALK         | 395533                | 81.27                       |
| ANXA7       | 135702                | 92.5                        |
| APC         | 770706                | 89.83                       |
| AR          | 86018                 | 30.6                        |
| ARAF        | 40989                 | 22.46                       |
| ARHGAP26    | 301023                | 121.87                      |
| ARID1A      | 683181                | 99.62                       |
| ARID2       | 742492                | 134.7                       |
| ASCL1       | 11060                 | 15.56                       |
| ASXL1       | 424665                | 91.66                       |
| ATM         | 1008052               | 109.92                      |
| ATR         | 962029                | 120.15                      |
| ATRX        | 753004                | 100.47                      |
| AURKA       | 132659                | 108.12                      |
| AURKB       | 44037                 | 42.42                       |
| AXL         | 185059                | 68.92                       |
| BAP1        | 129756                | 57.44                       |
| BCL2        | 48711                 | 64.69                       |
| BCL6        | 251371                | 118.52                      |
| BIVM        | 147619                | 108.3                       |
| BLM         | 403164                | 94.77                       |
| BMPR1A      | 218705                | 136.78                      |
| BRAF        | 292242                | 127.01                      |
| BRCA1       | 648038                | 114.53                      |
| BRCA2       | 883373                | 86.12                       |
| BRIP1       | 451606                | 120.43                      |
| BUB1B       | 368291                | 114.73                      |
| CAMK1D      | 90565                 | 75.91                       |
| CARD11      | 227263                | 65.59                       |
| CBFB        | 63231                 | 106.27                      |
| CBL         | 317931                | 116.84                      |
| CBLB        | 385539                | 129.16                      |
| CBLC        | 73335                 | 51.46                       |

|        |        |        |
|--------|--------|--------|
| CCND1  | 47900  | 53.94  |
| CCND2  | 76309  | 87.71  |
| CCND3  | 48422  | 49.26  |
| CCNE1  | 97476  | 77.92  |
| CD79A  | 22961  | 33.72  |
| CD79B  | 28036  | 40.46  |
| CDC73  | 187027 | 117.18 |
| CDH1   | 261563 | 93.58  |
| CDK12  | 369113 | 82.52  |
| CDK4   | 119100 | 130.59 |
| CDK6   | 76332  | 77.81  |
| CDK8   | 214603 | 153.84 |
| CDKN1A | 22372  | 44.74  |
| CDKN1B | 48508  | 65.55  |
| CDKN2A | 74152  | 75.05  |
| CDKN2B | 11477  | 23.05  |
| CDKN2C | 43318  | 85.44  |
| CDX1   | 21382  | 25.98  |
| CEBPA  | 8705   | 8.08   |
| CHEK1  | 168986 | 99.17  |
| CHEK2  | 135231 | 76.4   |
| CHUK   | 225259 | 100.65 |
| CIC    | 203123 | 42.08  |
| CREBBP | 594665 | 78.94  |
| CRKL   | 86275  | 94.6   |
| CRLF2  | 63563  | 82.44  |
| CSF1R  | 196939 | 65.69  |
| CTNNA1 | 260776 | 95.77  |
| CTNNB1 | 282292 | 120.33 |
| CYLD   | 412737 | 143.61 |
| DAXX   | 166850 | 75.06  |
| DCBLD1 | 58278  | 353.2  |
| DDB2   | 97935  | 76.27  |
| DDR2   | 407545 | 148.52 |
| DICER1 | 809066 | 138.97 |
| DLC1   | 485281 | 103.96 |
| DNMT1  | 352347 | 71.79  |
| DNMT3A | 152786 | 53.35  |
| EGFR   | 364059 | 90.36  |
| EP300  | 727860 | 100.46 |
| EPHA3  | 441212 | 148.16 |

© 2015 American Medical Association. All rights reserved.

|         |        |        |
|---------|--------|--------|
| EPHA5   | 411249 | 131.77 |
| EPHB6   | 244401 | 79.71  |
| ERBB2   | 212383 | 56.31  |
| ERBB2IP | 432645 | 105.11 |
| ERBB3   | 456657 | 106.55 |
| ERBB4   | 514369 | 130.98 |
| ERCC2   | 95455  | 40.86  |
| ERCC3   | 229330 | 89.69  |
| ERCC4   | 272163 | 98.9   |
| ERCC5   | 325909 | 91.52  |
| ERCC6   | 474578 | 148.21 |
| ERG     | 132297 | 86.02  |
| ESR1    | 138291 | 77.34  |
| ETV1    | 115913 | 77.53  |
| ETV4    | 102289 | 70.3   |
| ETV5    | 182785 | 113.74 |
| ETV6    | 199024 | 140.16 |
| EWSR1   | 158219 | 74.56  |
| EXT1    | 238359 | 106.36 |
| EXT2    | 288974 | 123.02 |
| EZH2    | 264342 | 117.17 |
| FAM123B | 95173  | 27.46  |
| FANCA   | 239680 | 54.78  |
| FANCB   | 166270 | 64.45  |
| FANCC   | 101729 | 60.66  |
| FANCD2  | 473383 | 104.68 |
| FANCE   | 115854 | 71.91  |
| FANCF   | 102037 | 90.7   |
| FANCG   | 147981 | 79.18  |
| FANCI   | 488448 | 121.5  |
| FANCL   | 115939 | 104.73 |
| FANCM   | 533855 | 86.74  |
| FBXO31  | 76194  | 47.03  |
| FBXW7   | 438647 | 173.24 |
| FGFR1   | 181393 | 67.68  |
| FGFR2   | 280110 | 103.36 |
| FGFR3   | 81333  | 27.27  |
| FGFR4   | 93259  | 29.37  |
| FH      | 186407 | 121.6  |
| FHIT    | 32547  | 73.3   |
| FKBP9   | 199038 | 116.12 |

© 2015 American Medical Association. All rights reserved.

|          |        |        |
|----------|--------|--------|
| FLCN     | 138490 | 66.07  |
| FLT1     | 435751 | 104.3  |
| FLT3     | 302240 | 101.05 |
| FLT4     | 175369 | 40.84  |
| FOXA1    | 48262  | 34.01  |
| FOXL2    | 18139  | 16.04  |
| FUBP1    | 240296 | 123.99 |
| GATA1    | 21500  | 15.97  |
| GATA2    | 53105  | 36.8   |
| GATA3    | 105562 | 78.95  |
| GATA4    | 60242  | 45.23  |
| GATA6    | 66490  | 37.19  |
| GNA11    | 57689  | 53.42  |
| GNAQ     | 130778 | 121.09 |
| GNAS     | 220465 | 55.2   |
| GOPC     | 118421 | 95.81  |
| GPC3     | 190108 | 104.45 |
| GPSM3    | 29332  | 41.08  |
| GUCY1A2  | 206110 | 93.73  |
| HGF      | 285669 | 128.39 |
| HIF1A    | 303053 | 122    |
| HNF1A    | 80617  | 30.65  |
| HRAS     | 38929  | 61.5   |
| HSP90AA1 | 194524 | 75.13  |
| IDH1     | 125153 | 100.52 |
| IDH2     | 93165  | 68.55  |
| IGF1R    | 343014 | 83.58  |
| IGF2     | 23129  | 32.12  |
| IKBKE    | 135898 | 63.18  |
| IKZF1    | 67041  | 42.98  |
| IL6ST    | 403850 | 146.48 |
| IL7R     | 161604 | 103.86 |
| INPP4B   | 365787 | 131.82 |
| JAK1     | 321626 | 92.82  |
| JAK2     | 351217 | 103.33 |
| JAK3     | 150262 | 42.6   |
| KDM5C    | 125594 | 26.29  |
| KDM6A    | 185237 | 44.04  |
| KDR      | 492121 | 120.88 |
| KEAP1    | 102631 | 54.74  |
| KIAA1549 | 359538 | 61.04  |

© 2015 American Medical Association. All rights reserved.

|        |         |        |
|--------|---------|--------|
| KIT    | 333831  | 113.74 |
| KLF6   | 102692  | 100.48 |
| KRAS   | 49850   | 72.56  |
| LMO1   | 35210   | 74.76  |
| MAP2K1 | 114989  | 97.28  |
| MAP2K2 | 20481   | 17.02  |
| MAP2K4 | 160586  | 133.82 |
| MAP3K1 | 411309  | 90.62  |
| MAP3K5 | 452372  | 103.42 |
| MAP3K7 | 198756  | 109.15 |
| MAP3K8 | 130827  | 86.58  |
| MAP3K9 | 211927  | 59.9   |
| MAPK1  | 98692   | 91.13  |
| MAPK3  | 77315   | 63.63  |
| MCL1   | 87814   | 82.53  |
| MDM2   | 209887  | 139.92 |
| MDM4   | 174940  | 118.76 |
| MED12  | 265864  | 40.29  |
| MEN1   | 113108  | 61.21  |
| MET    | 656493  | 152.11 |
| MITF   | 124770  | 69.32  |
| MLH1   | 277069  | 120.05 |
| MLL    | 1328268 | 111.43 |
| MLL2   | 698507  | 42.04  |
| MLL3   | 2484144 | 168.34 |
| MPL    | 158771  | 79.66  |
| MRE11A | 263308  | 123.79 |
| MSH2   | 292535  | 104.29 |
| MSH6   | 399527  | 97.02  |
| MTOR   | 824357  | 105.21 |
| MTUS2  | 200742  | 47.08  |
| MUTYH  | 114110  | 67.56  |
| MYC    | 80470   | 58.95  |
| MYCL1  | 66921   | 51.08  |
| MYCN   | 46413   | 33.27  |
| MYD88  | 79073   | 82.89  |
| MYST3  | 650857  | 107.99 |
| NBN    | 296354  | 130.84 |
| NF1    | 1164121 | 135.3  |
| NF2    | 125402  | 66.67  |
| NFE2L2 | 241265  | 127.65 |

© 2015 American Medical Association. All rights reserved.

|         |         |        |
|---------|---------|--------|
| NFKBIA  | 72359   | 75.85  |
| NKX2-1  | 14634   | 11.88  |
| NLRP2   | 191154  | 59.94  |
| NOTCH1  | 240046  | 31.3   |
| NOTCH2  | 1162047 | 147    |
| NOTCH3  | 183498  | 26.32  |
| NOTCH4  | 309992  | 58.51  |
| NPM1    | 66279   | 74.14  |
| NRAS    | 118605  | 208.08 |
| NTRK1   | 101396  | 40.2   |
| NTRK2   | 308333  | 119.32 |
| NTRK3   | 233338  | 83.84  |
| PALB2   | 313157  | 87.94  |
| PARK2   | 148532  | 105.42 |
| PAX5    | 99619   | 82.53  |
| PBRM1   | 458893  | 93.56  |
| PDGFRA  | 394491  | 119.15 |
| PDGFRB  | 240006  | 71.54  |
| PDPK1   | 259824  | 155.12 |
| PHF6    | 75881   | 62.87  |
| PHOX2B  | 34090   | 36.07  |
| PIK3CA  | 442838  | 138    |
| PIK3CG  | 375748  | 113.55 |
| PIK3R1  | 324428  | 139.78 |
| PMS1    | 278983  | 95.28  |
| PMS2    | 305228  | 117.89 |
| PPP2R1A | 132134  | 69.91  |
| PRDM1   | 287281  | 115.51 |
| PREX2   | 556517  | 114.18 |
| PRF1    | 72803   | 43.65  |
| PRKAR1A | 169019  | 147.49 |
| PTCH1   | 327669  | 71.33  |
| PTEN    | 194480  | 160.46 |
| PTK2B   | 248386  | 76.97  |
| PTPN11  | 163842  | 91.74  |
| PTPRD   | 836277  | 143.57 |
| RAD51L1 | 104794  | 89.41  |
| RAF1    | 197628  | 101.5  |
| RARA    | 100834  | 48.25  |
| RB1     | 252249  | 90.51  |
| REL     | 216332  | 116.31 |

© 2015 American Medical Association. All rights reserved.

|          |        |        |
|----------|--------|--------|
| RET      | 205569 | 60.87  |
| RICTOR   | 936700 | 182.7  |
| ROS1     | 877648 | 124.6  |
| RPTOR    | 327196 | 80.91  |
| RUNX1    | 142181 | 89.65  |
| RUNX1T1  | 240525 | 122.22 |
| RUNX3    | 65587  | 50.22  |
| SBDS     | 77274  | 102.62 |
| SDCCAG8  | 3289   | 74.75  |
| SDHB     | 71808  | 85.18  |
| SDHC     | 70549  | 114.34 |
| SDHD     | 31244  | 90.3   |
| SETD2    | 722130 | 93.84  |
| SF3B1    | 464307 | 116.51 |
| SGK1     | 218804 | 101.39 |
| SGK3     | 184343 | 123.47 |
| SMAD2    | 169638 | 120.82 |
| SMAD3    | 123245 | 91.16  |
| SMAD4    | 223665 | 134.82 |
| SMARCA4  | 270868 | 53.65  |
| SMARCB1  | 106944 | 88.24  |
| SMO      | 128480 | 54.35  |
| SOCS1    | 5496   | 8.64   |
| SOX2     | 36281  | 38.03  |
| SRC      | 70817  | 43.96  |
| STK11    | 25835  | 19.84  |
| SUFU     | 152110 | 94.42  |
| SYK      | 179266 | 93.95  |
| TARBP2   | 80631  | 67.7   |
| TCF4     | 296015 | 144.12 |
| TERT     | 118693 | 34.92  |
| TET2     | 335159 | 54.36  |
| TGFBR2   | 199284 | 112.02 |
| TNFAIP3  | 263440 | 111.02 |
| TNFRSF14 | 35738  | 41.95  |
| TOP1     | 194108 | 84.47  |
| TP53     | 79457  | 62.91  |
| TRIM62   | 67656  | 45.84  |
| TSC1     | 351042 | 98.41  |
| TSC2     | 258974 | 46.42  |
| TSHR     | 325410 | 133.8  |

© 2015 American Medical Association. All rights reserved.



|         |        |       |
|---------|--------|-------|
| UNKNOWN | 211255 | 13.59 |
| VHL     | 24860  | 38.72 |
| VRK2    | 1709   | 47.47 |
| WAS     | 28289  | 18.75 |
| WRN     | 420997 | 97.93 |
| WT1     | 95107  | 61.04 |
| XPA     | 41305  | 50.25 |
| XPC     | 185700 | 65.78 |
| XPO1    | 301024 | 92.99 |
| ZNF276  | 39133  | 46.15 |
| ZNF668  | 88959  | 46.12 |

This table provides mean target coverage per gene. Data was generated using DepthOfCoverage<sup>9</sup>.

eTable 4. Coverage by Intervals Across the Exome

| Target              | Total coverage | Average coverage (X) |
|---------------------|----------------|----------------------|
| 1:2488104-2488172   | 529            | 7.67                 |
| 1:2489165-2489273   | 1109           | 10.17                |
| 1:2489782-2489907   | 13060          | 103.65               |
| 1:2490320-2490438   | 0              | 0                    |
| 1:2490475-2490573   | 0              | 0                    |
| 1:2491262-2491417   | 1974           | 12.65                |
| 1:2492063-2492153   | 2814           | 30.92                |
| 1:2492933-2492963   | 0              | 0                    |
| 1:2493112-2493254   | 7728           | 54.04                |
| 1:2494304-2494335   | 2720           | 85                   |
| 1:2494587-2494712   | 5804           | 46.06                |
| 1:11166997-11167181 | 0              | 0                    |
| 1:11167542-11167557 | 630            | 39.38                |
| 1:11168238-11168343 | 15020          | 141.7                |
| 1:11169347-11169427 | 11020          | 136.05               |
| 1:11169706-11169786 | 5298           | 65.41                |
| 1:11171185-11171188 | 0              | 0                    |
| 1:11172909-11172974 | 8554           | 129.61               |
| 1:11174375-11174510 | 12563          | 92.38                |
| 1:11174870-11174944 | 7921           | 105.61               |
| 1:11175453-11175525 | 16604          | 227.45               |
| 1:11177061-11177143 | 13824          | 166.55               |
| 1:11181303-11181425 | 8859           | 72.02                |
| 1:11182036-11182183 | 6174           | 41.72                |
| 1:11184555-11184690 | 6358           | 46.75                |
| 1:11186679-11186853 | 20893          | 119.39               |
| 1:11187067-11187201 | 8205           | 60.78                |
| 1:11187681-11187863 | 33438          | 182.72               |
| 1:11188061-11188183 | 20680          | 168.13               |
| 1:11188511-11188609 | 9115           | 92.07                |
| 1:11188912-11189008 | 4281           | 44.13                |
| 1:11189795-11189895 | 6330           | 62.67                |
| 1:11190586-11190834 | 7620           | 30.6                 |
| 1:11193137-11193254 | 15293          | 129.6                |
| 1:11194408-11194523 | 18324          | 157.97               |
| 1:11199361-11199492 | 19129          | 144.92               |
| 1:11199590-11199715 | 20118          | 159.67               |
| 1:11204705-11204812 | 13207          | 122.29               |
| 1:11205025-11205102 | 17595          | 225.58               |

|                     |       |        |
|---------------------|-------|--------|
| 1:11206733-11206848 | 10760 | 92.76  |
| 1:11210183-11210283 | 5433  | 53.79  |
| 1:11217209-11217348 | 14648 | 104.63 |
| 1:11227499-11227574 | 12269 | 161.43 |
| 1:11259315-11259460 | 11522 | 78.92  |
| 1:11259598-11259760 | 26277 | 161.21 |
| 1:11264618-11264760 | 9448  | 66.07  |
| 1:11269369-11269515 | 30127 | 204.95 |
| 1:11270871-11270963 | 11001 | 118.29 |
| 1:11272369-11272531 | 21448 | 131.58 |
| 1:11272853-11272965 | 15089 | 133.53 |
| 1:11273456-11273623 | 23229 | 138.27 |
| 1:11276205-11276291 | 7867  | 90.43  |
| 1:11288725-11288975 | 31513 | 125.55 |
| 1:11290982-11291111 | 19490 | 149.92 |
| 1:11291357-11291491 | 22829 | 169.1  |
| 1:11292493-11292585 | 12102 | 130.13 |
| 1:11293455-11293544 | 9337  | 103.74 |
| 1:11294200-11294322 | 13649 | 110.97 |
| 1:11297900-11298105 | 15158 | 73.58  |
| 1:11298459-11298674 | 29461 | 136.39 |
| 1:11300360-11300604 | 17059 | 69.63  |
| 1:11301610-11301738 | 10838 | 84.02  |
| 1:11303171-11303357 | 14042 | 75.09  |
| 1:11307682-11307790 | 19023 | 174.52 |
| 1:11307876-11308151 | 21713 | 78.67  |
| 1:11313896-11314030 | 20035 | 148.41 |
| 1:11316049-11316249 | 5890  | 29.3   |
| 1:11316990-11317222 | 9531  | 40.91  |
| 1:11318542-11318650 | 9507  | 87.22  |
| 1:11319305-11319466 | 17009 | 104.99 |
| 1:17345376-17345453 | 10376 | 133.03 |
| 1:17349103-17349225 | 9114  | 74.1   |
| 1:17350468-17350569 | 4263  | 41.79  |
| 1:17354244-17354360 | 14529 | 124.18 |
| 1:17355095-17355231 | 16043 | 117.1  |
| 1:17359555-17359640 | 6998  | 81.37  |
| 1:17371256-17371383 | 9547  | 74.59  |
| 1:17380443-17380514 | 938   | 13.03  |
| 1:25228613-25229157 | 20804 | 38.17  |
| 1:25233750-25233908 | 5587  | 35.14  |

© 2015 American Medical Association. All rights reserved.

|                     |        |        |
|---------------------|--------|--------|
| 1:25245731-25245835 | 6879   | 65.51  |
| 1:25254065-25254221 | 27626  | 175.96 |
| 1:25255531-25255533 | 0      | 0      |
| 1:25256078-25256359 | 3505   | 12.43  |
| 1:25291005-25291062 | 1186   | 20.45  |
| 1:27022895-27024031 | 4103   | 3.61   |
| 1:27056142-27056354 | 26778  | 125.72 |
| 1:27057643-27058095 | 166655 | 367.89 |
| 1:27059167-27059283 | 11015  | 94.15  |
| 1:27087347-27087587 | 26026  | 107.99 |
| 1:27087875-27087964 | 9884   | 109.82 |
| 1:27088643-27088810 | 15757  | 93.79  |
| 1:27089464-27089776 | 18254  | 58.32  |
| 1:27092712-27092857 | 12977  | 88.88  |
| 1:27092948-27093057 | 2914   | 26.49  |
| 1:27094281-27094490 | 22913  | 109.11 |
| 1:27097610-27097817 | 13062  | 62.8   |
| 1:27098991-27099123 | 11062  | 83.17  |
| 1:27099303-27099478 | 12876  | 73.16  |
| 1:27099837-27099987 | 8916   | 59.05  |
| 1:27100071-27100208 | 13676  | 99.1   |
| 1:27100293-27100389 | 31569  | 325.45 |
| 1:27100820-27101711 | 68011  | 76.25  |
| 1:27102068-27102198 | 9040   | 69.01  |
| 1:27102308-27102391 | 268    | 3.19   |
| 1:27105514-27107247 | 197693 | 114.01 |
| 1:33611460-33611507 | 0      | 0      |
| 1:33612778-33613328 | 39293  | 71.31  |
| 1:33623854-33623969 | 10245  | 88.32  |
| 1:33625289-33625545 | 12887  | 50.14  |
| 1:33631072-33631167 | 2196   | 22.88  |
| 1:33642009-33642053 | 0      | 0      |
| 1:33646626-33647033 | 3035   | 7.44   |
| 1:40363044-40363642 | 62807  | 104.85 |
| 1:40366486-40367115 | 4114   | 6.53   |
| 1:40367480-40367560 | 0      | 0      |
| 1:43803520-43803598 | 1188   | 15.04  |
| 1:43803770-43803902 | 9447   | 71.03  |
| 1:43804213-43804391 | 16652  | 93.03  |
| 1:43804942-43805240 | 20063  | 67.1   |
| 1:43805635-43805797 | 7297   | 44.77  |

© 2015 American Medical Association. All rights reserved.

|                     |       |        |
|---------------------|-------|--------|
| 1:43806058-43806184 | 28433 | 223.88 |
| 1:43812116-43812300 | 21878 | 118.26 |
| 1:43812463-43812605 | 13259 | 92.72  |
| 1:43814514-43814673 | 93    | 0.58   |
| 1:43814934-43815115 | 10519 | 57.8   |
| 1:43817887-43817974 | 10629 | 120.78 |
| 1:43818189-43818443 | 19313 | 75.74  |
| 1:45794978-45795109 | 21851 | 165.54 |
| 1:45795738-45795740 | 0     | 0      |
| 1:45796188-45796229 | 609   | 14.5   |
| 1:45796854-45797006 | 13196 | 86.25  |
| 1:45797092-45797228 | 4068  | 29.69  |
| 1:45797333-45797544 | 3432  | 16.19  |
| 1:45797695-45797758 | 5123  | 80.05  |
| 1:45797838-45797982 | 4773  | 32.92  |
| 1:45798063-45798160 | 4083  | 41.66  |
| 1:45798246-45798359 | 6542  | 57.39  |
| 1:45798435-45798506 | 7706  | 107.03 |
| 1:45798590-45798631 | 2432  | 57.9   |
| 1:45798769-45798842 | 14566 | 196.84 |
| 1:45798957-45798996 | 1397  | 34.93  |
| 1:45799085-45799275 | 10510 | 55.03  |
| 1:45800063-45800183 | 11692 | 96.63  |
| 1:45803858-45803869 | 0     | 0      |
| 1:45805875-45805926 | 2130  | 40.96  |
| 1:51436041-51436169 | 12722 | 98.62  |
| 1:51439565-51439942 | 30596 | 80.94  |
| 1:65300245-65300340 | 8051  | 83.86  |
| 1:65301079-65301189 | 9326  | 84.02  |
| 1:65301781-65301898 | 10292 | 87.22  |
| 1:65303615-65303787 | 14638 | 84.61  |
| 1:65304148-65304272 | 7297  | 58.38  |
| 1:65305286-65305478 | 14886 | 77.13  |
| 1:65306928-65307022 | 8730  | 91.89  |
| 1:65307134-65307284 | 17439 | 115.49 |
| 1:65309747-65309898 | 26546 | 174.64 |
| 1:65310437-65310572 | 9991  | 73.46  |
| 1:65311196-65311323 | 19690 | 153.83 |
| 1:65312332-65312419 | 4488  | 51     |
| 1:65313215-65313358 | 16428 | 114.08 |
| 1:65316487-65316593 | 5491  | 51.32  |

© 2015 American Medical Association. All rights reserved.

|                       |        |        |
|-----------------------|--------|--------|
| 1:65321192-65321381   | 5685   | 29.92  |
| 1:65323339-65323462   | 9712   | 78.32  |
| 1:65325788-65325945   | 14597  | 92.39  |
| 1:65330470-65330655   | 8425   | 45.3   |
| 1:65332549-65332891   | 57691  | 168.2  |
| 1:65334994-65335157   | 18470  | 112.62 |
| 1:65339053-65339206   | 11689  | 75.9   |
| 1:65344708-65344831   | 10004  | 80.68  |
| 1:65348960-65349158   | 11715  | 58.87  |
| 1:65351942-65351947   | 345    | 57.5   |
| 1:78413199-78413237   | 0      | 0      |
| 1:78414451-78414459   | 610    | 67.78  |
| 1:78414558-78414599   | 112    | 2.67   |
| 1:78414840-78414985   | 25433  | 174.2  |
| 1:78420940-78421017   | 6446   | 82.64  |
| 1:78422257-78422385   | 16570  | 128.45 |
| 1:78425869-78425948   | 4268   | 53.35  |
| 1:78426029-78426180   | 2595   | 17.07  |
| 1:78428455-78428615   | 20056  | 124.57 |
| 1:78429259-78429400   | 8140   | 57.32  |
| 1:78429747-78429847   | 27014  | 267.47 |
| 1:78429939-78430041   | 7320   | 71.07  |
| 1:78430331-78430432   | 28048  | 274.98 |
| 1:78430555-78430653   | 18034  | 182.16 |
| 1:78430753-78430915   | 38542  | 236.45 |
| 1:78432378-78432435   | 4407   | 75.98  |
| 1:78432568-78432639   | 6356   | 88.28  |
| 1:78432733-78432785   | 3120   | 58.87  |
| 1:78433311-78433350   | 3973   | 99.33  |
| 1:78433849-78433887   | 1811   | 46.44  |
| 1:78434706-78434768   | 0      | 0      |
| 1:78435609-78435699   | 6780   | 74.51  |
| 1:78444569-78444688   | 10773  | 89.78  |
| 1:115251156-115251275 | 26422  | 220.18 |
| 1:115252190-115252349 | 15824  | 98.9   |
| 1:115256421-115256599 | 46723  | 261.02 |
| 1:115258671-115258781 | 29636  | 266.99 |
| 1:120457929-120459317 | 176623 | 127.16 |
| 1:120460288-120460385 | 18266  | 186.39 |
| 1:120461029-120461176 | 19997  | 135.11 |
| 1:120461935-120462236 | 18528  | 61.35  |

© 2015 American Medical Association. All rights reserved.

|                       |       |        |
|-----------------------|-------|--------|
| 1:120462852-120463020 | 11701 | 69.24  |
| 1:120464336-120464432 | 10080 | 103.92 |
| 1:120464859-120465069 | 15812 | 74.94  |
| 1:120465259-120465401 | 31460 | 220    |
| 1:120466260-120466607 | 33265 | 95.59  |
| 1:120467928-120468433 | 76413 | 151.01 |
| 1:120469122-120469234 | 3087  | 27.32  |
| 1:120471599-120471835 | 19744 | 83.31  |
| 1:120478095-120478227 | 22014 | 165.52 |
| 1:120479905-120480089 | 35340 | 191.03 |
| 1:120480480-120480633 | 9767  | 63.42  |
| 1:120483178-120483379 | 36510 | 180.74 |
| 1:120484149-120484377 | 19354 | 84.52  |
| 1:120491037-120491189 | 23463 | 153.35 |
| 1:120491630-120491749 | 29776 | 248.13 |
| 1:120493117-120493460 | 29805 | 86.64  |
| 1:120496166-120496311 | 31107 | 213.06 |
| 1:120497663-120497855 | 32489 | 168.34 |
| 1:120502015-120502125 | 13585 | 122.39 |
| 1:120506197-120506430 | 75036 | 320.67 |
| 1:120508076-120508189 | 61900 | 542.98 |
| 1:120508999-120509112 | 37546 | 329.35 |
| 1:120510056-120510244 | 38237 | 202.31 |
| 1:120510700-120510855 | 14941 | 95.78  |
| 1:120512134-120512367 | 21130 | 90.3   |
| 1:120529583-120529705 | 21087 | 171.44 |
| 1:120534085-120534105 | 0     | 0      |
| 1:120534232-120534256 | 0     | 0      |
| 1:120539289-120539354 | 9275  | 140.53 |
| 1:120539359-120539369 | 1040  | 94.55  |
| 1:120539424-120539426 | 77    | 25.67  |
| 1:120539620-120539955 | 56596 | 168.44 |
| 1:120547952-120548211 | 69148 | 265.95 |
| 1:120572529-120572610 | 45043 | 549.3  |
| 1:120611397-120611741 | 0     | 0      |
| 1:120611744-120612075 | 3197  | 9.63   |
| 1:150549840-150549967 | 39884 | 311.59 |
| 1:150550720-150550967 | 23332 | 94.08  |
| 1:150551319-150552006 | 24598 | 35.75  |
| 1:156785622-156785630 | 598   | 66.44  |
| 1:156811873-156811985 | 6709  | 59.37  |

© 2015 American Medical Association. All rights reserved.

|                       |        |        |
|-----------------------|--------|--------|
| 1:156830727-156830938 | 1393   | 6.57   |
| 1:156834146-156834220 | 3197   | 42.63  |
| 1:156834520-156834591 | 1649   | 22.9   |
| 1:156836702-156836770 | 4646   | 67.33  |
| 1:156837896-156838041 | 5440   | 37.26  |
| 1:156838297-156838439 | 485    | 3.39   |
| 1:156841415-156841547 | 8641   | 64.97  |
| 1:156843425-156843751 | 3996   | 12.22  |
| 1:156844175-156844192 | 3505   | 194.72 |
| 1:156844363-156844418 | 1563   | 27.91  |
| 1:156844698-156844800 | 13153  | 127.7  |
| 1:156845312-156845458 | 10152  | 69.06  |
| 1:156845863-156846002 | 7816   | 55.83  |
| 1:156846192-156846364 | 3978   | 22.99  |
| 1:156848914-156849154 | 8907   | 36.96  |
| 1:156849791-156849949 | 14204  | 89.33  |
| 1:156851249-156851434 | 1364   | 7.33   |
| 1:161284196-161284215 | 701    | 35.05  |
| 1:161293404-161293460 | 5171   | 90.72  |
| 1:161298186-161298287 | 10328  | 101.25 |
| 1:161309352-161309376 | 0      | 0      |
| 1:161310384-161310445 | 13906  | 224.29 |
| 1:161326467-161326630 | 29040  | 177.07 |
| 1:161332119-161332330 | 11403  | 53.79  |
| 1:162688854-162688935 | 16255  | 198.23 |
| 1:162722885-162722987 | 8035   | 78.01  |
| 1:162724414-162724645 | 17715  | 76.36  |
| 1:162724946-162725093 | 12785  | 86.39  |
| 1:162725454-162725559 | 16283  | 153.61 |
| 1:162729586-162729769 | 32537  | 176.83 |
| 1:162731001-162731244 | 19507  | 79.95  |
| 1:162735791-162735853 | 11600  | 184.13 |
| 1:162737019-162737149 | 27427  | 209.37 |
| 1:162740092-162740469 | 42139  | 111.48 |
| 1:162741814-162742046 | 9622   | 41.3   |
| 1:162743259-162743386 | 18890  | 147.58 |
| 1:162745442-162745633 | 58569  | 305.05 |
| 1:162745926-162746160 | 62690  | 266.77 |
| 1:162748370-162748519 | 24371  | 162.47 |
| 1:162749902-162750036 | 29120  | 215.7  |
| 1:179076853-179078576 | 166270 | 96.44  |

© 2015 American Medical Association. All rights reserved.



|                       |       |        |
|-----------------------|-------|--------|
| 1:179079417-179079590 | 22329 | 128.33 |
| 1:179079940-179079980 | 15561 | 379.54 |
| 1:179081444-179081533 | 5943  | 66.03  |
| 1:179084013-179084165 | 19944 | 130.35 |
| 1:179086467-179086651 | 17680 | 95.57  |
| 1:179087722-179087899 | 34040 | 191.24 |
| 1:179089325-179089409 | 11146 | 131.13 |
| 1:179090730-179091002 | 31048 | 113.73 |
| 1:179095512-179095807 | 39683 | 134.06 |
| 1:179100446-179100616 | 12795 | 74.82  |
| 1:179102447-179102509 | 31907 | 506.46 |
| 1:179112068-179112179 | 13055 | 116.56 |
| 1:179198376-179198532 | 2308  | 14.7   |
| 1:193091331-193091461 | 28060 | 214.2  |
| 1:193094242-193094347 | 10845 | 102.31 |
| 1:193099304-193099373 | 7485  | 106.93 |
| 1:193104521-193104583 | 4614  | 73.24  |
| 1:193104667-193104719 | 1671  | 31.53  |
| 1:193107215-193107303 | 21695 | 243.76 |
| 1:193110980-193111196 | 14057 | 64.78  |
| 1:193116997-193117095 | 5771  | 58.29  |
| 1:193119434-193119512 | 5841  | 73.94  |
| 1:193121510-193121574 | 4277  | 65.8   |
| 1:193172925-193172982 | 6102  | 105.21 |
| 1:193181195-193181230 | 414   | 11.5   |
| 1:193181520-193181607 | 27729 | 315.1  |
| 1:193202123-193202284 | 9222  | 56.93  |
| 1:193205386-193205486 | 19206 | 190.16 |
| 1:193218860-193219001 | 18469 | 130.06 |
| 1:193219806-193219842 | 1569  | 42.41  |
| 1:204494647-204494724 | 11498 | 147.41 |
| 1:204495488-204495562 | 4286  | 57.15  |
| 1:204499812-204499945 | 21396 | 159.67 |
| 1:204501319-204501374 | 7216  | 128.86 |
| 1:204501897-204501947 | 6997  | 137.2  |
| 1:204506046-204506047 | 31    | 15.5   |
| 1:204506558-204506625 | 16441 | 241.78 |
| 1:204507042-204507119 | 3820  | 48.97  |
| 1:204507337-204507436 | 12768 | 127.68 |
| 1:204511912-204512072 | 14873 | 92.38  |
| 1:204513663-204513812 | 10987 | 73.25  |

© 2015 American Medical Association. All rights reserved.

|                       |       |        |
|-----------------------|-------|--------|
| 1:204515925-204516005 | 5372  | 66.32  |
| 1:204518241-204518810 | 70103 | 122.99 |
| 1:204527769-204527809 | 0     | 0      |
| 1:206646571-206646657 | 1926  | 22.14  |
| 1:206647674-206647814 | 6214  | 44.07  |
| 1:206648208-206648337 | 5636  | 43.35  |
| 1:206649524-206649705 | 16776 | 92.18  |
| 1:206650021-206650181 | 10636 | 66.06  |
| 1:206651092-206651202 | 794   | 7.15   |
| 1:206651503-206651682 | 26672 | 148.18 |
| 1:206652286-206652476 | 23368 | 122.35 |
| 1:206653213-206653277 | 2362  | 36.34  |
| 1:206653365-206653456 | 572   | 6.22   |
| 1:206653790-206653876 | 4435  | 50.98  |
| 1:206658334-206658409 | 3985  | 52.43  |
| 1:206658531-206658643 | 2915  | 25.8   |
| 1:206661251-206661327 | 2981  | 38.71  |
| 1:206664152-206664191 | 4523  | 113.08 |
| 1:206664981-206665082 | 6279  | 61.56  |
| 1:206666356-206666452 | 449   | 4.63   |
| 1:206666599-206666711 | 8371  | 74.08  |
| 1:206667253-206667324 | 4363  | 60.6   |
| 1:206669445-206669478 | 2641  | 77.68  |
| 1:241661128-241661270 | 6727  | 47.04  |
| 1:241663737-241663890 | 31084 | 201.84 |
| 1:241665743-241665870 | 18272 | 142.75 |
| 1:241667342-241667545 | 19637 | 96.26  |
| 1:241669303-241669468 | 11759 | 70.84  |
| 1:241671903-241672085 | 18404 | 100.57 |
| 1:241675267-241675443 | 45076 | 254.67 |
| 1:241676903-241677013 | 18794 | 169.32 |
| 1:241680482-241680616 | 16346 | 121.08 |
| 1:241682891-241683022 | 308   | 2.33   |
| 1:243663045-243663088 | 3289  | 74.75  |
| 1:243668551-243668636 | 6815  | 79.24  |
| 1:243675626-243675728 | 4885  | 47.43  |
| 1:243708812-243708899 | 8059  | 91.58  |
| 1:243716031-243716245 | 23547 | 109.52 |
| 1:243727022-243727150 | 13452 | 104.28 |
| 1:243736228-243736350 | 9026  | 73.38  |
| 1:243776973-243777041 | 9290  | 134.64 |

© 2015 American Medical Association. All rights reserved.

|                       |       |        |
|-----------------------|-------|--------|
| 1:243778398-243778463 | 4582  | 69.42  |
| 1:243800913-243801044 | 4976  | 37.7   |
| 1:243809195-243809339 | 10019 | 69.1   |
| 1:243828074-243828185 | 14536 | 129.79 |
| 1:243858893-243859018 | 4118  | 32.68  |
| 1:244006427-244006472 | 10016 | 217.74 |
| 2:16082187-16082976   | 11116 | 14.07  |
| 2:16085615-16086219   | 35297 | 58.34  |
| 2:25457148-25457289   | 9124  | 64.25  |
| 2:25458576-25458694   | 9371  | 78.75  |
| 2:25459805-25459874   | 1680  | 24     |
| 2:25461999-25462084   | 4081  | 47.45  |
| 2:25462359-25462382   | 0     | 0      |
| 2:25463171-25463319   | 10591 | 71.08  |
| 2:25463509-25463599   | 6648  | 73.05  |
| 2:25464431-25464576   | 7356  | 50.38  |
| 2:25466767-25466851   | 156   | 1.84   |
| 2:25467024-25467207   | 3388  | 18.41  |
| 2:25467409-25467521   | 7238  | 64.05  |
| 2:25468122-25468201   | 2100  | 26.25  |
| 2:25468889-25468933   | 2731  | 60.69  |
| 2:25469029-25469178   | 15283 | 101.89 |
| 2:25469489-25469645   | 13577 | 86.48  |
| 2:25469920-25470027   | 4339  | 40.18  |
| 2:25470460-25470618   | 12170 | 76.54  |
| 2:25470906-25471121   | 10394 | 48.12  |
| 2:25472526-25472593   | 6603  | 97.1   |
| 2:25475063-25475066   | 18    | 4.5    |
| 2:25497810-25497956   | 2162  | 14.71  |
| 2:25498369-25498412   | 8780  | 199.55 |
| 2:25505257-25505580   | 8596  | 26.53  |
| 2:25523008-25523112   | 6196  | 59.01  |
| 2:25536782-25536853   | 204   | 2.83   |
| 2:29416090-29416788   | 88030 | 125.94 |
| 2:29419636-29419726   | 13017 | 143.04 |
| 2:29420408-29420542   | 16584 | 122.84 |
| 2:29430037-29430138   | 7087  | 69.48  |
| 2:29430911            | 0     | 0      |
| 2:29432652-29432744   | 6071  | 65.28  |
| 2:29436850-29436947   | 8296  | 84.65  |
| 2:29443572-29443701   | 5915  | 45.5   |

© 2015 American Medical Association. All rights reserved.

|                     |       |        |
|---------------------|-------|--------|
| 2:29443854-29444103 | 30    | 0.12   |
| 2:29445210-29445274 | 2442  | 37.57  |
| 2:29445383-29445473 | 2189  | 24.05  |
| 2:29446208-29446394 | 10870 | 58.13  |
| 2:29448327-29448431 | 2697  | 25.69  |
| 2:29449788-29449940 | 26822 | 175.31 |
| 2:29450440-29450538 | 11217 | 113.3  |
| 2:29451750-29451932 | 11237 | 61.4   |
| 2:29455170-29455314 | 8978  | 61.92  |
| 2:29456431-29456562 | 14736 | 111.64 |
| 2:29462546-29462696 | 15451 | 102.32 |
| 2:29473971-29474133 | 4232  | 25.96  |
| 2:29497965-29498093 | 7024  | 54.45  |
| 2:29498268-29498362 | 8874  | 93.41  |
| 2:29519754-29519923 | 11731 | 69.01  |
| 2:29541170-29541270 | 8743  | 86.56  |
| 2:29543617-29543748 | 21406 | 162.17 |
| 2:29551216-29551347 | 8055  | 61.02  |
| 2:29606598-29606725 | 10192 | 79.63  |
| 2:29754781-29754982 | 17074 | 84.52  |
| 2:29917716-29917880 | 18319 | 111.02 |
| 2:29940440-29940563 | 13172 | 106.23 |
| 2:30142859-30143525 | 15072 | 22.6   |
| 2:47630331-47630541 | 1326  | 6.28   |
| 2:47635540-47635694 | 7617  | 49.14  |
| 2:47637233-47637511 | 64281 | 230.4  |
| 2:47639553-47639699 | 9312  | 63.35  |
| 2:47641408-47641557 | 11299 | 75.33  |
| 2:47643435-47643568 | 12298 | 91.78  |
| 2:47656881-47657080 | 20091 | 100.46 |
| 2:47672687-47672796 | 5354  | 48.67  |
| 2:47690170-47690293 | 12061 | 97.27  |
| 2:47691419-47691465 | 0     | 0      |
| 2:47693797-47693947 | 14792 | 97.96  |
| 2:47698104-47698201 | 5872  | 59.92  |
| 2:47702164-47702409 | 28027 | 113.93 |
| 2:47703506-47703710 | 25401 | 123.91 |
| 2:47705411-47705658 | 51691 | 208.43 |
| 2:47707835-47708010 | 17266 | 98.1   |
| 2:47709918-47710088 | 5847  | 34.19  |
| 2:47739442-47739573 | 1316  | 9.97   |

© 2015 American Medical Association. All rights reserved.

|                     |        |        |
|---------------------|--------|--------|
| 2:48010373-48010632 | 3840   | 14.77  |
| 2:48018066-48018262 | 25363  | 128.75 |
| 2:48023033-48023202 | 6451   | 37.95  |
| 2:48025750-48028329 | 283506 | 109.89 |
| 2:48030559-48030824 | 24243  | 91.14  |
| 2:48032049-48032166 | 12751  | 108.06 |
| 2:48032757-48032846 | 13400  | 148.89 |
| 2:48033343-48033497 | 12901  | 83.23  |
| 2:48033591-48033790 | 10597  | 52.99  |
| 2:48033918-48033999 | 6475   | 78.96  |
| 2:58386900-58386935 | 1709   | 47.47  |
| 2:58387243-58387314 | 12036  | 167.17 |
| 2:58388657-58388773 | 13380  | 114.36 |
| 2:58390001-58390082 | 5697   | 69.48  |
| 2:58390164-58390209 | 4351   | 94.59  |
| 2:58390569-58390652 | 5380   | 64.05  |
| 2:58392859-58393009 | 18078  | 119.72 |
| 2:58421364-58421408 | 0      | 0      |
| 2:58425714-58425797 | 7415   | 88.27  |
| 2:58431265-58431361 | 20284  | 209.11 |
| 2:58449077-58449177 | 7206   | 71.35  |
| 2:58453863-58453919 | 3939   | 69.11  |
| 2:58456949-58457009 | 5562   | 91.18  |
| 2:58459189-58459247 | 6326   | 107.22 |
| 2:58468353-58468448 | 6285   | 65.47  |
| 2:61108976-61108985 | 20     | 2      |
| 2:61118818-61118960 | 24583  | 171.91 |
| 2:61121532-61121680 | 12481  | 83.77  |
| 2:61128127-61128218 | 4648   | 50.52  |
| 2:61144012-61144152 | 12883  | 91.37  |
| 2:61145326-61145430 | 6823   | 64.98  |
| 2:61145529-61145741 | 31758  | 149.1  |
| 2:61147176-61147244 | 4880   | 70.72  |
| 2:61147518-61147613 | 69     | 0.72   |
| 2:61147709-61147777 | 3713   | 53.81  |
| 2:61148898-61149670 | 114474 | 148.09 |
| 2:61705955-61706101 | 11525  | 78.4   |
| 2:61708320-61708416 | 3653   | 37.66  |
| 2:61709515-61709674 | 14923  | 93.27  |
| 2:61710092-61710226 | 11176  | 82.79  |
| 2:61711072-61711240 | 23928  | 141.59 |

© 2015 American Medical Association. All rights reserved.

|                       |        |        |
|-----------------------|--------|--------|
| 2:61712903-61713097   | 17069  | 87.53  |
| 2:61715300-61715406   | 23238  | 217.18 |
| 2:61715723-61715906   | 6318   | 34.34  |
| 2:61717777-61717911   | 22006  | 163.01 |
| 2:61719170-61719333   | 14262  | 86.96  |
| 2:61719460-61719616   | 5804   | 36.97  |
| 2:61719702-61719883   | 13266  | 72.89  |
| 2:61720050-61720188   | 18639  | 134.09 |
| 2:61721029-61721226   | 36229  | 182.97 |
| 2:61722590-61722748   | 9743   | 61.28  |
| 2:61724014-61724142   | 14987  | 116.18 |
| 2:61725808-61725927   | 10777  | 89.81  |
| 2:61726000-61726048   | 1084   | 22.12  |
| 2:61726848-61727029   | 16412  | 90.18  |
| 2:61729131-61729175   | 1655   | 36.78  |
| 2:61729384-61729445   | 2701   | 43.56  |
| 2:61749746-61749818   | 6263   | 85.79  |
| 2:61753534-61753656   | 7228   | 58.76  |
| 2:61760907-61761032   | 8138   | 64.59  |
| 2:128015172-128015303 | 8515   | 64.51  |
| 2:128016872-128017024 | 11444  | 74.8   |
| 2:128018804-128018922 | 6291   | 52.87  |
| 2:128028912-128029029 | 12041  | 102.04 |
| 2:128030441-128030537 | 8484   | 87.46  |
| 2:128036749-128036951 | 11476  | 56.53  |
| 2:128038023-128038207 | 9432   | 50.98  |
| 2:128044279-128044593 | 31535  | 100.11 |
| 2:128046236-128046440 | 73836  | 360.18 |
| 2:128046913-128047095 | 8624   | 47.13  |
| 2:128047265-128047400 | 6502   | 47.81  |
| 2:128047800-128047851 | 5880   | 113.08 |
| 2:128050186-128050422 | 24691  | 104.18 |
| 2:128051089-128051294 | 8918   | 43.29  |
| 2:128051442-128051657 | 1661   | 7.69   |
| 2:178092634-178092681 | 0      | 0      |
| 2:178095513-178096736 | 200141 | 163.51 |
| 2:178097120-178097311 | 13016  | 67.79  |
| 2:178097906-178098067 | 13597  | 83.93  |
| 2:178098733-178098999 | 14371  | 53.82  |
| 2:178129260-178129304 | 140    | 3.11   |
| 2:190656536-190656667 | 7204   | 54.58  |

© 2015 American Medical Association. All rights reserved.

|                       |       |        |
|-----------------------|-------|--------|
| 2:190660495-190660677 | 24491 | 133.83 |
| 2:190670378-190670608 | 12979 | 56.19  |
| 2:190671149-190671228 | 0     | 0      |
| 2:190682743-190682907 | 3179  | 19.27  |
| 2:190708690-190708806 | 17851 | 152.57 |
| 2:190717381-190717503 | 21864 | 177.76 |
| 2:190718665-190718808 | 13768 | 95.61  |
| 2:190718965-190719854 | 80322 | 90.25  |
| 2:190722211-190722230 | 0     | 0      |
| 2:190728469-190728954 | 62110 | 127.8  |
| 2:190729080-190729085 | 37    | 6.17   |
| 2:190732525-190732655 | 10753 | 82.08  |
| 2:190738222-190738382 | 10794 | 67.04  |
| 2:190741998-190742162 | 13668 | 82.84  |
| 2:198257027-198257185 | 6200  | 38.99  |
| 2:198257696-198257912 | 16645 | 76.71  |
| 2:198260780-198261052 | 55736 | 204.16 |
| 2:198262709-198262840 | 12421 | 94.1   |
| 2:198263185-198263305 | 28643 | 236.72 |
| 2:198263693-198263752 | 0     | 0      |
| 2:198264779-198264890 | 18861 | 168.4  |
| 2:198264976-198265158 | 33985 | 185.71 |
| 2:198265439-198265660 | 21760 | 98.02  |
| 2:198266124-198266249 | 10521 | 83.5   |
| 2:198266466-198266612 | 19584 | 133.22 |
| 2:198266709-198266854 | 12665 | 86.75  |
| 2:198267280-198267550 | 28849 | 106.45 |
| 2:198267673-198267759 | 5119  | 58.84  |
| 2:198268309-198268488 | 12146 | 67.48  |
| 2:198269800-198269901 | 4090  | 40.1   |
| 2:198269999-198270196 | 10670 | 53.89  |
| 2:198272722-198272843 | 10902 | 89.36  |
| 2:198273093-198273305 | 22498 | 105.62 |
| 2:198274494-198274731 | 46648 | 196    |
| 2:198281465-198281635 | 28083 | 164.23 |
| 2:198283233-198283312 | 8185  | 102.31 |
| 2:198283656-198283675 | 228   | 11.4   |
| 2:198285102-198285266 | 15122 | 91.65  |
| 2:198285753-198285857 | 20216 | 192.53 |
| 2:198288532-198288698 | 13166 | 78.84  |
| 2:198299696-198299723 | 1364  | 48.71  |

© 2015 American Medical Association. All rights reserved.

|                       |       |        |
|-----------------------|-------|--------|
| 2:209101803-209101893 | 2917  | 32.05  |
| 2:209103795-209103957 | 9467  | 58.08  |
| 2:209104587-209104727 | 17709 | 125.6  |
| 2:209106718-209106869 | 22111 | 145.47 |
| 2:209108151-209108328 | 16360 | 91.91  |
| 2:209110043-209110148 | 17696 | 166.94 |
| 2:209113093-209113384 | 29913 | 102.44 |
| 2:209116154-209116275 | 8980  | 73.61  |
| 2:212248340-212248785 | 75639 | 169.59 |
| 2:212251578-212251875 | 46331 | 155.47 |
| 2:212252670-212252717 | 6583  | 137.15 |
| 2:212285166-212285336 | 11023 | 64.46  |
| 2:212286732-212286829 | 8441  | 86.13  |
| 2:212288880-212289026 | 14619 | 99.45  |
| 2:212293133-212293208 | 11756 | 154.68 |
| 2:212295670-212295825 | 21417 | 137.29 |
| 2:212426628-212426813 | 44862 | 241.19 |
| 2:212483902-212484000 | 7839  | 79.18  |
| 2:212488647-212488769 | 8487  | 69     |
| 2:212495187-212495319 | 8606  | 64.71  |
| 2:212522479-212522553 | 19880 | 265.07 |
| 2:212522675-212522719 | 3417  | 75.93  |
| 2:212530048-212530202 | 19511 | 125.88 |
| 2:212537889-212537982 | 15304 | 162.81 |
| 2:212543777-212543909 | 5409  | 40.67  |
| 2:212566692-212566891 | 47580 | 237.9  |
| 2:212568829-212568919 | 12178 | 133.82 |
| 2:212570043-212570116 | 11545 | 156.01 |
| 2:212576775-212576901 | 11872 | 93.48  |
| 2:212578260-212578373 | 8370  | 73.42  |
| 2:212587118-212587259 | 19065 | 134.26 |
| 2:212589801-212589919 | 25923 | 217.84 |
| 2:212615364-212615429 | 9014  | 136.58 |
| 2:212652750-212652884 | 12932 | 95.79  |
| 2:212812155-212812341 | 8781  | 46.96  |
| 2:212989477-212989628 | 15763 | 103.7  |
| 2:213403173-213403254 | 5639  | 68.77  |
| 3:10070342-10070405   | 3059  | 47.8   |
| 3:10073983-10074035   | 0     | 0      |
| 3:10074516-10074656   | 8723  | 61.87  |
| 3:10076153-10076220   | 6124  | 90.06  |

© 2015 American Medical Association. All rights reserved.



|                     |       |        |
|---------------------|-------|--------|
| 3:10076379-10076482 | 322   | 3.1    |
| 3:10076857-10076917 | 5577  | 91.43  |
| 3:10077971-10078023 | 3455  | 65.19  |
| 3:10080963-10081041 | 4605  | 58.29  |
| 3:10081405-10081560 | 17391 | 111.48 |
| 3:10082221-10082224 | 0     | 0      |
| 3:10083307-10083394 | 11691 | 132.85 |
| 3:10084243-10084347 | 24864 | 236.8  |
| 3:10084734-10084834 | 7120  | 70.5   |
| 3:10085168-10085276 | 5665  | 51.97  |
| 3:10085513-10085548 | 2696  | 74.89  |
| 3:10088264-10088407 | 20789 | 144.37 |
| 3:10089601-10089735 | 21553 | 159.65 |
| 3:10091058-10091189 | 35731 | 270.69 |
| 3:10094071-10094181 | 8629  | 77.74  |
| 3:10101978-10102087 | 7499  | 68.17  |
| 3:10103835-10103895 | 1135  | 18.61  |
| 3:10105476-10105595 | 9046  | 75.38  |
| 3:10106040-10106113 | 18683 | 252.47 |
| 3:10106413-10106559 | 14840 | 100.95 |
| 3:10107078-10107178 | 15193 | 150.43 |
| 3:10107548-10107663 | 6440  | 55.52  |
| 3:10108893-10109001 | 6486  | 59.5   |
| 3:10114555-10114665 | 6929  | 62.42  |
| 3:10114937-10115046 | 13042 | 118.56 |
| 3:10116214-10116357 | 9788  | 67.97  |
| 3:10119765-10119881 | 14863 | 127.03 |
| 3:10122784-10122912 | 9114  | 70.65  |
| 3:10123030-10123148 | 20315 | 170.71 |
| 3:10127496-10127606 | 14324 | 129.05 |
| 3:10128818-10128948 | 15850 | 120.99 |
| 3:10130133-10130226 | 8226  | 87.51  |
| 3:10130512-10130634 | 19994 | 162.55 |
| 3:10131976-10132069 | 3953  | 42.05  |
| 3:10133865-10133936 | 12568 | 174.56 |
| 3:10134969-10135007 | 2983  | 76.49  |
| 3:10135973-10136047 | 13365 | 178.2  |
| 3:10136884-10136958 | 4395  | 58.6   |
| 3:10138010-10138156 | 14304 | 97.31  |
| 3:10140404-10140634 | 16149 | 69.91  |
| 3:10142872-10142946 | 5905  | 78.73  |

© 2015 American Medical Association. All rights reserved.

|                     |       |        |
|---------------------|-------|--------|
| 3:10183532-10183871 | 2665  | 7.84   |
| 3:10188198-10188320 | 17884 | 145.4  |
| 3:10191471-10191649 | 4311  | 24.08  |
| 3:12626013-12626156 | 14414 | 100.1  |
| 3:12626346-12626480 | 5103  | 37.8   |
| 3:12626621-12626752 | 9958  | 75.44  |
| 3:12627180-12627298 | 10069 | 84.61  |
| 3:12629090-12629136 | 10014 | 213.06 |
| 3:12632297-12632473 | 25322 | 143.06 |
| 3:12633207-12633291 | 9525  | 112.06 |
| 3:12641190-12641307 | 6196  | 52.51  |
| 3:12641651-12641778 | 8034  | 62.77  |
| 3:12641887-12641914 | 1954  | 69.79  |
| 3:12644977-12645036 | 0     | 0      |
| 3:12645635-12645788 | 16620 | 107.92 |
| 3:12647700-12647798 | 3070  | 31.01  |
| 3:12650265-12650422 | 18070 | 114.37 |
| 3:12650732-12650834 | 12085 | 117.33 |
| 3:12653449-12653561 | 20038 | 177.33 |
| 3:12660014-12660220 | 27156 | 131.19 |
| 3:14187441-14187659 | 8251  | 37.68  |
| 3:14188790-14188879 | 1092  | 12.13  |
| 3:14189408-14189501 | 1074  | 11.43  |
| 3:14190062-14190231 | 12405 | 72.97  |
| 3:14190314-14190448 | 7360  | 54.52  |
| 3:14193835-14193916 | 3046  | 37.15  |
| 3:14197835-14197995 | 17392 | 108.02 |
| 3:14199511-14200392 | 90262 | 102.34 |
| 3:14201241-14201330 | 645   | 7.17   |
| 3:14206313-14206433 | 4938  | 40.81  |
| 3:14206928-14207085 | 4011  | 25.39  |
| 3:14208669-14208753 | 1968  | 23.15  |
| 3:14209757-14209880 | 5816  | 46.9   |
| 3:14211938-14212050 | 18144 | 160.57 |
| 3:14214367-14214562 | 3896  | 19.88  |
| 3:14219966-14220068 | 5400  | 52.43  |
| 3:30648376-30648469 | 513   | 5.46   |
| 3:30664691-30664765 | 2497  | 33.29  |
| 3:30686239-30686407 | 12402 | 73.38  |
| 3:30691762-30691952 | 15802 | 82.73  |
| 3:30703024-30703131 | 2873  | 26.6   |

© 2015 American Medical Association. All rights reserved.

|                     |        |        |
|---------------------|--------|--------|
| 3:30713130-30713929 | 124573 | 155.72 |
| 3:30715597-30715738 | 17548  | 123.58 |
| 3:30729876-30730003 | 10231  | 79.93  |
| 3:30732912-30733091 | 15718  | 87.32  |
| 3:37035039-37035185 | 13213  | 89.88  |
| 3:37038110-37038200 | 7055   | 77.53  |
| 3:37042446-37042544 | 9028   | 91.19  |
| 3:37045892-37045965 | 8785   | 118.72 |
| 3:37048482-37048554 | 5187   | 71.05  |
| 3:37050305-37050396 | 5472   | 59.48  |
| 3:37053311-37053353 | 5608   | 130.42 |
| 3:37053502-37053590 | 11373  | 127.79 |
| 3:37055923-37056035 | 8850   | 78.32  |
| 3:37058997-37059090 | 15184  | 161.53 |
| 3:37061801-37061954 | 14824  | 96.26  |
| 3:37067128-37067498 | 40349  | 108.76 |
| 3:37070275-37070423 | 43696  | 293.26 |
| 3:37081677-37081785 | 15364  | 140.95 |
| 3:37083753-37083822 | 7616   | 108.8  |
| 3:37089010-37089174 | 22602  | 136.98 |
| 3:37090008-37090100 | 14931  | 160.55 |
| 3:37090395-37090508 | 10986  | 96.37  |
| 3:37091977-37092144 | 16946  | 100.87 |
| 3:37107108-37107110 | 6      | 2      |
| 3:38180153-38180519 | 11960  | 32.59  |
| 3:38181355-38181489 | 3853   | 28.54  |
| 3:38181879-38182083 | 29492  | 143.86 |
| 3:38182248-38182339 | 13467  | 146.38 |
| 3:38182623-38182777 | 20301  | 130.97 |
| 3:41265560-41265572 | 3157   | 242.85 |
| 3:41266017-41266244 | 14422  | 63.25  |
| 3:41266445-41266698 | 42103  | 165.76 |
| 3:41266825-41267063 | 11074  | 46.33  |
| 3:41267151-41267352 | 17307  | 85.68  |
| 3:41268699-41268843 | 9794   | 67.54  |
| 3:41274832-41274935 | 7623   | 73.3   |
| 3:41275020-41275358 | 73007  | 215.36 |
| 3:41275630-41275788 | 16717  | 105.14 |
| 3:41277215-41277334 | 25633  | 213.61 |
| 3:41277840-41277990 | 13725  | 90.89  |
| 3:41278079-41278200 | 16004  | 131.18 |

© 2015 American Medical Association. All rights reserved.

|                     |        |        |
|---------------------|--------|--------|
| 3:41279507-41279567 | 17024  | 279.08 |
| 3:41280625-41280833 | 14702  | 70.34  |
| 3:47058583-47058744 | 14193  | 87.61  |
| 3:47059128-47059229 | 7167   | 70.26  |
| 3:47061250-47061330 | 5889   | 72.7   |
| 3:47079156-47079267 | 7326   | 65.41  |
| 3:47084051-47084190 | 17080  | 122    |
| 3:47087977-47088111 | 10408  | 77.1   |
| 3:47098311-47098980 | 64899  | 96.86  |
| 3:47103653-47103836 | 28567  | 155.26 |
| 3:47106104-47106120 | 0      | 0      |
| 3:47108560-47108608 | 7296   | 148.9  |
| 3:47125210-47125872 | 131499 | 198.34 |
| 3:47127685-47127804 | 9663   | 80.53  |
| 3:47129603-47129737 | 17913  | 132.69 |
| 3:47139445-47139571 | 13364  | 105.23 |
| 3:47142948-47143045 | 20078  | 204.88 |
| 3:47144836-47144913 | 13166  | 168.79 |
| 3:47147487-47147610 | 15717  | 126.75 |
| 3:47155366-47155494 | 10635  | 82.44  |
| 3:47158113-47158244 | 18981  | 143.8  |
| 3:47161243-47161270 | 0      | 0      |
| 3:47161672-47166038 | 308145 | 70.56  |
| 3:47168138-47168153 | 40     | 2.5    |
| 3:47169049-47169053 | 0      | 0      |
| 3:47179765-47179775 | 0      | 0      |
| 3:47186999-47187007 | 0      | 0      |
| 3:47199048-47199054 | 0      | 0      |
| 3:47205344-47205414 | 104    | 1.46   |
| 3:52436304-52436437 | 552    | 4.12   |
| 3:52436618-52436690 | 5831   | 79.88  |
| 3:52436795-52436956 | 12130  | 74.88  |
| 3:52437154-52437314 | 6754   | 41.95  |
| 3:52437432-52437910 | 27918  | 58.28  |
| 3:52438469-52438602 | 4099   | 30.59  |
| 3:52439126-52439310 | 20060  | 108.43 |
| 3:52439781-52439928 | 5784   | 39.08  |
| 3:52440269-52440392 | 6486   | 52.31  |
| 3:52440845-52440923 | 393    | 4.97   |
| 3:52441190-52441332 | 6738   | 47.12  |
| 3:52441415-52441476 | 6882   | 111    |

© 2015 American Medical Association. All rights reserved.

|                     |       |        |
|---------------------|-------|--------|
| 3:52441974-52442093 | 3849  | 32.08  |
| 3:52442490-52442622 | 1826  | 13.73  |
| 3:52443570-52443624 | 18519 | 336.71 |
| 3:52443730-52443759 | 316   | 10.53  |
| 3:52443858-52443894 | 1619  | 43.76  |
| 3:52582079-52582251 | 14231 | 82.26  |
| 3:52584437-52584653 | 13110 | 60.41  |
| 3:52584763-52584833 | 3804  | 53.58  |
| 3:52588740-52588895 | 8892  | 57     |
| 3:52592265-52592429 | 0     | 0      |
| 3:52595783-52595984 | 40516 | 200.57 |
| 3:52597299-52597509 | 16550 | 78.44  |
| 3:52598066-52598249 | 11547 | 62.76  |
| 3:52610557-52610714 | 8246  | 52.19  |
| 3:52613070-52613215 | 17615 | 120.65 |
| 3:52620441-52620704 | 31844 | 120.62 |
| 3:52621369-52621526 | 12396 | 78.46  |
| 3:52623086-52623271 | 32118 | 172.68 |
| 3:52637537-52637748 | 4814  | 22.71  |
| 3:52643329-52643971 | 65704 | 102.18 |
| 3:52649367-52649472 | 6501  | 61.33  |
| 3:52651278-52651554 | 20300 | 73.29  |
| 3:52658913-52658957 | 0     | 0      |
| 3:52661289-52661386 | 8353  | 85.23  |
| 3:52662910-52663051 | 11753 | 82.77  |
| 3:52668618-52668831 | 20952 | 97.91  |
| 3:52675970-52676061 | 23153 | 251.66 |
| 3:52677264-52677359 | 16051 | 167.2  |
| 3:52678720-52678805 | 957   | 11.13  |
| 3:52682360-52682458 | 10152 | 102.55 |
| 3:52685758-52685826 | 3489  | 50.57  |
| 3:52692215-52692331 | 7326  | 62.62  |
| 3:52696149-52696292 | 24035 | 166.91 |
| 3:52702514-52702661 | 5927  | 40.05  |
| 3:52712516-52712613 | 10264 | 104.73 |
| 3:52713590-52713727 | 8293  | 60.09  |
| 3:59737952-59738047 | 4679  | 48.74  |
| 3:59908072-59908140 | 6395  | 92.68  |
| 3:59997097-59997126 | 2438  | 81.27  |
| 3:59999733-59999878 | 12910 | 88.42  |
| 3:60522593-60522695 | 6125  | 59.47  |

© 2015 American Medical Association. All rights reserved.

|                       |        |        |
|-----------------------|--------|--------|
| 3:69788749-69788852   | 1387   | 13.34  |
| 3:69812993-69813093   | 630    | 6.24   |
| 3:69915442-69915497   | 5244   | 93.64  |
| 3:69928256-69928534   | 16876  | 60.49  |
| 3:69985874-69985906   | 2657   | 80.52  |
| 3:69986973-69987200   | 19747  | 86.61  |
| 3:69988249-69988332   | 6416   | 76.38  |
| 3:69990387-69990482   | 7509   | 78.22  |
| 3:69998202-69998319   | 7060   | 59.83  |
| 3:70000963-70001037   | 5074   | 67.65  |
| 3:70005606-70005681   | 4703   | 61.88  |
| 3:70008424-70008571   | 7811   | 52.78  |
| 3:70013998-70014399   | 39656  | 98.65  |
| 3:89156899-89156986   | 17608  | 200.09 |
| 3:89176359-89176423   | 8172   | 125.72 |
| 3:89259010-89259670   | 116892 | 176.84 |
| 3:89390066-89390221   | 37608  | 241.08 |
| 3:89390905-89391240   | 29870  | 88.9   |
| 3:89444987-89445111   | 27613  | 220.9  |
| 3:89448468-89448656   | 20097  | 106.33 |
| 3:89456419-89456521   | 8990   | 87.28  |
| 3:89457217-89457281   | 11401  | 175.4  |
| 3:89462291-89462416   | 25087  | 199.1  |
| 3:89468355-89468540   | 16041  | 86.24  |
| 3:89478256-89478317   | 9872   | 159.23 |
| 3:89480300-89480509   | 18682  | 88.96  |
| 3:89498375-89498524   | 32329  | 215.53 |
| 3:89499327-89499520   | 24744  | 127.55 |
| 3:89521614-89521769   | 32062  | 205.53 |
| 3:89528547-89528652   | 4144   | 39.09  |
| 3:105377814-105378073 | 33436  | 128.6  |
| 3:105389077-105389196 | 12131  | 101.09 |
| 3:105397275-105397415 | 8850   | 62.77  |
| 3:105400318-105400454 | 19415  | 141.72 |
| 3:105400551-105400662 | 18200  | 162.5  |
| 3:105404164-105404310 | 16496  | 112.22 |
| 3:105412338-105412432 | 8083   | 85.08  |
| 3:105420938-105421303 | 40515  | 110.7  |
| 3:105422832-105423017 | 35942  | 193.24 |
| 3:105438891-105439094 | 11840  | 58.04  |
| 3:105452853-105452984 | 13284  | 100.64 |

© 2015 American Medical Association. All rights reserved.

|                       |       |        |
|-----------------------|-------|--------|
| 3:105456015-105456102 | 10356 | 117.68 |
| 3:105459338-105459475 | 20667 | 149.76 |
| 3:105464761-105464882 | 20409 | 167.29 |
| 3:105468568-105468609 | 0     | 0      |
| 3:105470306-105470462 | 14739 | 93.88  |
| 3:105495240-105495386 | 19552 | 133.01 |
| 3:105572258-105572508 | 44860 | 178.73 |
| 3:105586254-105586435 | 36764 | 202    |
| 3:105588181-105588232 | 0     | 0      |
| 3:128199862-128200161 | 22213 | 74.04  |
| 3:128200662-128200787 | 6216  | 49.33  |
| 3:128202703-128202848 | 9011  | 61.72  |
| 3:128204570-128205211 | 12461 | 19.41  |
| 3:128205646-128205874 | 3204  | 13.99  |
| 3:138664434-138665564 | 18139 | 16.04  |
| 3:142168271-142168444 | 15772 | 90.64  |
| 3:142169375-142169444 | 5319  | 75.99  |
| 3:142171898-142172075 | 9853  | 55.35  |
| 3:142176446-142176597 | 13144 | 86.47  |
| 3:142177800-142177953 | 11552 | 75.01  |
| 3:142178069-142178225 | 14311 | 91.15  |
| 3:142180782-142180932 | 42435 | 281.03 |
| 3:142183939-142184082 | 8062  | 55.99  |
| 3:142185166-142185375 | 26575 | 126.55 |
| 3:142186776-142186910 | 18700 | 138.52 |
| 3:142188179-142188411 | 40220 | 172.62 |
| 3:142188928-142189025 | 4421  | 45.11  |
| 3:142203982-142204124 | 11764 | 82.27  |
| 3:142211974-142212153 | 13260 | 73.67  |
| 3:142215203-142215362 | 29855 | 186.59 |
| 3:142215855-142216034 | 15266 | 84.81  |
| 3:142217439-142217616 | 7564  | 42.49  |
| 3:142217972-142218034 | 0     | 0      |
| 3:142218469-142218560 | 20641 | 224.36 |
| 3:142222204-142222295 | 14034 | 152.54 |
| 3:142223981-142224145 | 30173 | 182.87 |
| 3:142226773-142226951 | 11396 | 63.66  |
| 3:142231102-142231312 | 44917 | 212.88 |
| 3:142232343-142232480 | 22290 | 161.52 |
| 3:142234237-142234357 | 8596  | 71.04  |
| 3:142238511-142238626 | 21867 | 188.51 |

© 2015 American Medical Association. All rights reserved.

|                       |       |        |
|-----------------------|-------|--------|
| 3:142241570-142241683 | 20510 | 179.91 |
| 3:142242835-142243041 | 33418 | 161.44 |
| 3:142253922-142254047 | 10698 | 84.9   |
| 3:142254950-142255043 | 5271  | 56.07  |
| 3:142257324-142257467 | 13690 | 95.07  |
| 3:142259746-142259876 | 8748  | 66.78  |
| 3:142261507-142261599 | 6422  | 69.05  |
| 3:142266567-142266752 | 19106 | 102.72 |
| 3:142268321-142268515 | 7472  | 38.32  |
| 3:142268974-142269144 | 19681 | 115.09 |
| 3:142272069-142272240 | 16594 | 96.48  |
| 3:142272482-142272582 | 6247  | 61.85  |
| 3:142272667-142272857 | 9178  | 48.05  |
| 3:142274719-142274981 | 27880 | 106.01 |
| 3:142275225-142275417 | 24936 | 129.2  |
| 3:142277466-142277618 | 92891 | 607.13 |
| 3:142278093-142278283 | 14707 | 77     |
| 3:142279105-142279296 | 32985 | 171.8  |
| 3:142280085-142280263 | 25478 | 142.34 |
| 3:142281074-142281951 | 81568 | 92.9   |
| 3:142284963-142285103 | 20214 | 143.36 |
| 3:142286905-142286996 | 6639  | 72.16  |
| 3:142297488-142297546 | 1028  | 17.42  |
| 3:178916614-178916967 | 30174 | 85.24  |
| 3:178917478-178917687 | 30848 | 146.9  |
| 3:178919078-178919328 | 35848 | 142.82 |
| 3:178921332-178921577 | 31518 | 128.12 |
| 3:178922291-178922376 | 16999 | 197.66 |
| 3:178927383-178927488 | 28575 | 269.58 |
| 3:178927974-178928126 | 21812 | 142.56 |
| 3:178928219-178928353 | 24391 | 180.67 |
| 3:178935998-178936122 | 9683  | 77.46  |
| 3:178936984-178937065 | 8880  | 108.29 |
| 3:178937359-178937523 | 15703 | 95.17  |
| 3:178937737-178937840 | 24532 | 235.88 |
| 3:178938774-178938945 | 22113 | 128.56 |
| 3:178941869-178941975 | 7809  | 72.98  |
| 3:178942488-178942609 | 16588 | 135.97 |
| 3:178943750-178943828 | 11323 | 143.33 |
| 3:178947060-178947230 | 19875 | 116.23 |
| 3:178947792-178947909 | 42469 | 359.91 |

© 2015 American Medical Association. All rights reserved.



|                       |        |        |
|-----------------------|--------|--------|
| 3:178948013-178948164 | 12272  | 80.74  |
| 3:178951882-178952152 | 31426  | 115.96 |
| 3:181430149-181431102 | 36281  | 38.03  |
| 3:185766428-185766649 | 15323  | 69.02  |
| 3:185769819-185769920 | 14291  | 140.11 |
| 3:185774864-185775033 | 16666  | 98.04  |
| 3:185775212-185775280 | 29209  | 423.32 |
| 3:185782206-185782265 | 8859   | 147.65 |
| 3:185783602-185783861 | 24362  | 93.7   |
| 3:185797606-185797893 | 27549  | 95.66  |
| 3:185798835-185798964 | 22201  | 170.78 |
| 3:185801958-185802069 | 0      | 0      |
| 3:185823094-185823144 | 7584   | 148.71 |
| 3:185823238-185823285 | 3567   | 74.31  |
| 3:185823414-185823501 | 10468  | 118.95 |
| 3:185823613-185823731 | 2706   | 22.74  |
| 3:185826246-185826297 | 0      | 0      |
| 3:187440246-187440389 | 18780  | 130.42 |
| 3:187442729-187442866 | 10940  | 79.28  |
| 3:187443287-187443417 | 19395  | 148.05 |
| 3:187444519-187444686 | 23525  | 140.03 |
| 3:187446148-187446332 | 6185   | 33.43  |
| 3:187446838-187447809 | 112945 | 116.2  |
| 3:187449497-187449718 | 29360  | 132.25 |
| 3:187451321-187451481 | 30241  | 187.83 |
| 4:1795662-1795770     | 72     | 0.66   |
| 4:1800981-1801250     | 7837   | 29.03  |
| 4:1801474-1801539     | 1177   | 17.83  |
| 4:1803094-1803263     | 90     | 0.53   |
| 4:1803347-1803470     | 2380   | 19.19  |
| 4:1803562-1803752     | 10050  | 52.62  |
| 4:1804641-1804791     | 2021   | 13.38  |
| 4:1805419-1805563     | 7276   | 50.18  |
| 4:1806057-1806247     | 19441  | 101.79 |
| 4:1806548-1806696     | 125    | 0.84   |
| 4:1807082-1807203     | 2990   | 24.51  |
| 4:1807286-1807396     | 2614   | 23.55  |
| 4:1807477-1807667     | 10127  | 53.02  |
| 4:1807778-1807900     | 2240   | 18.21  |
| 4:1807984-1808054     | 2533   | 35.68  |
| 4:1808273-1808410     | 4858   | 35.2   |

© 2015 American Medical Association. All rights reserved.

|                     |       |        |
|---------------------|-------|--------|
| 4:1808556-1808661   | 2442  | 23.04  |
| 4:1808843-1809139   | 1113  | 3.75   |
| 4:1809145-1809315   | 242   | 1.42   |
| 4:1809320-1809343   | 129   | 5.38   |
| 4:1809348-1809383   | 690   | 19.17  |
| 4:1809388-1809414   | 886   | 32.81  |
| 4:41747824-41748339 | 13957 | 27.05  |
| 4:41749366-41749553 | 12679 | 67.44  |
| 4:41749665-41749724 | 91    | 1.52   |
| 4:41750387-41750627 | 7454  | 30.93  |
| 4:55106220-55106282 | 0     | 0      |
| 4:55124924-55124984 | 5755  | 94.34  |
| 4:55127262-55127579 | 59817 | 188.1  |
| 4:55129834-55130123 | 25258 | 87.1   |
| 4:55131086-55131216 | 16175 | 123.47 |
| 4:55133456-55133627 | 15697 | 91.26  |
| 4:55133719-55133908 | 16801 | 88.43  |
| 4:55136800-55136915 | 11275 | 97.2   |
| 4:55138561-55138687 | 13730 | 108.11 |
| 4:55139704-55139897 | 14232 | 73.36  |
| 4:55140698-55140792 | 18464 | 194.36 |
| 4:55141008-55141140 | 12505 | 94.02  |
| 4:55143555-55143659 | 9462  | 90.11  |
| 4:55144063-55144173 | 7591  | 68.39  |
| 4:55144529-55144682 | 14203 | 92.23  |
| 4:55144986-55145061 | 0     | 0      |
| 4:55146483-55146649 | 10881 | 65.16  |
| 4:55151538-55151653 | 6640  | 57.24  |
| 4:55152008-55152130 | 33964 | 276.13 |
| 4:55153597-55153708 | 23223 | 207.35 |
| 4:55154966-55155065 | 11940 | 119.4  |
| 4:55155176-55155281 | 7435  | 70.14  |
| 4:55156480-55156721 | 35169 | 145.33 |
| 4:55161292-55161439 | 24274 | 164.01 |
| 4:55524182-55524248 | 1301  | 19.42  |
| 4:55561678-55561947 | 22237 | 82.36  |
| 4:55564450-55564731 | 19036 | 67.5   |
| 4:55565796-55565932 | 17038 | 124.36 |
| 4:55569890-55570058 | 27798 | 164.49 |
| 4:55573264-55573453 | 15290 | 80.47  |
| 4:55575590-55575709 | 11722 | 97.68  |

© 2015 American Medical Association. All rights reserved.

|                     |       |        |
|---------------------|-------|--------|
| 4:55575750-55575753 | 28    | 7      |
| 4:55589750-55589864 | 11139 | 96.86  |
| 4:55592023-55592216 | 13490 | 69.54  |
| 4:55593384-55593490 | 42099 | 393.45 |
| 4:55593582-55593708 | 11459 | 90.23  |
| 4:55593989-55594093 | 8098  | 77.12  |
| 4:55594177-55594287 | 10369 | 93.41  |
| 4:55595501-55595651 | 10383 | 68.76  |
| 4:55597494-55597585 | 8383  | 91.12  |
| 4:55598037-55598164 | 15807 | 123.49 |
| 4:55599236-55599358 | 23094 | 187.76 |
| 4:55602664-55602775 | 16411 | 146.53 |
| 4:55602887-55602986 | 12629 | 126.29 |
| 4:55603341-55603446 | 13213 | 124.65 |
| 4:55604595-55604723 | 22835 | 177.02 |
| 4:55946108-55946330 | 46165 | 207.02 |
| 4:55948123-55948208 | 9129  | 106.15 |
| 4:55948703-55948802 | 13338 | 133.38 |
| 4:55953774-55953925 | 15367 | 101.1  |
| 4:55955035-55955140 | 7217  | 68.08  |
| 4:55955541-55955640 | 2382  | 23.82  |
| 4:55955858-55955969 | 14383 | 128.42 |
| 4:55956123-55956245 | 13601 | 110.58 |
| 4:55958784-55958881 | 7391  | 75.42  |
| 4:55960969-55961122 | 17419 | 113.11 |
| 4:55961744-55961832 | 7889  | 88.64  |
| 4:55962396-55962509 | 13300 | 116.67 |
| 4:55963829-55963933 | 11875 | 113.1  |
| 4:55964304-55964439 | 22566 | 165.93 |
| 4:55964864-55964970 | 14097 | 131.75 |
| 4:55968064-55968195 | 14416 | 109.21 |
| 4:55968529-55968675 | 16706 | 113.65 |
| 4:55970810-55971151 | 33548 | 98.09  |
| 4:55971999-55972107 | 50338 | 461.82 |
| 4:55972854-55972977 | 7254  | 58.5   |
| 4:55973904-55974060 | 27080 | 172.48 |
| 4:55976570-55976733 | 18803 | 114.65 |
| 4:55976821-55976935 | 14414 | 125.34 |
| 4:55979471-55979648 | 21254 | 119.4  |
| 4:55980293-55980432 | 22225 | 158.75 |
| 4:55981041-55981209 | 10492 | 62.08  |

|                       |        |        |
|-----------------------|--------|--------|
| 4:55981448-55981578   | 6684   | 51.02  |
| 4:55984771-55984967   | 23660  | 120.1  |
| 4:55987264-55987357   | 8127   | 86.46  |
| 4:55991394-55991460   | 1001   | 14.94  |
| 4:66189832-66189937   | 10826  | 102.13 |
| 4:66197687-66197846   | 18077  | 112.98 |
| 4:66201650-66201843   | 31248  | 161.07 |
| 4:66213772-66213921   | 26493  | 176.62 |
| 4:66217107-66217316   | 30767  | 146.51 |
| 4:66218760-66218821   | 6056   | 97.68  |
| 4:66230735-66230920   | 43384  | 233.25 |
| 4:66231650-66231775   | 25594  | 203.13 |
| 4:66233075-66233142   | 7246   | 106.56 |
| 4:66242716-66242781   | 4196   | 63.58  |
| 4:66270092-66270197   | 10756  | 101.47 |
| 4:66280002-66280161   | 27340  | 170.88 |
| 4:66286159-66286283   | 8484   | 67.87  |
| 4:66356095-66356430   | 45001  | 133.93 |
| 4:66361106-66361261   | 29928  | 191.85 |
| 4:66467359-66468022   | 76802  | 115.67 |
| 4:66509081-66509145   | 5587   | 85.95  |
| 4:66535280-66535460   | 3464   | 19.14  |
| 4:106111627-106111643 | 0      | 0      |
| 4:106155054-106158597 | 334807 | 94.47  |
| 4:106162496-106162590 | 0      | 0      |
| 4:106163991-106164084 | 56     | 0.6    |
| 4:106164727-106164935 | 0      | 0      |
| 4:106180776-106180926 | 0      | 0      |
| 4:106182916-106183005 | 0      | 0      |
| 4:106190767-106190904 | 0      | 0      |
| 4:106193721-106194075 | 0      | 0      |
| 4:106196205-106197676 | 296    | 0.2    |
| 4:142949935-142950067 | 15556  | 116.96 |
| 4:142951281-142951455 | 0      | 0      |
| 4:143003184-143003338 | 25019  | 161.41 |
| 4:143007297-143007409 | 6422   | 56.83  |
| 4:143029246-143029343 | 4733   | 48.3   |
| 4:143033695-143033835 | 21866  | 155.08 |
| 4:143043281-143043398 | 9299   | 78.81  |
| 4:143044445-143044568 | 18223  | 146.96 |
| 4:143045741-143045913 | 15473  | 89.44  |

© 2015 American Medical Association. All rights reserved.

|                       |       |        |
|-----------------------|-------|--------|
| 4:143066993-143067149 | 42469 | 270.5  |
| 4:143081511-143081714 | 24497 | 120.08 |
| 4:143094785-143094962 | 24509 | 137.69 |
| 4:143114240-143114348 | 12769 | 117.15 |
| 4:143129578-143129682 | 14698 | 139.98 |
| 4:143130049-143130179 | 19879 | 151.75 |
| 4:143159017-143159164 | 8962  | 60.55  |
| 4:143181645-143181717 | 5083  | 69.63  |
| 4:143191816-143191927 | 20217 | 180.51 |
| 4:143226611-143226690 | 24472 | 305.9  |
| 4:143226853-143226888 | 7     | 0.19   |
| 4:143235865-143235915 | 9361  | 183.55 |
| 4:143268680-143268709 | 0     | 0      |
| 4:143305246-143305269 | 0     | 0      |
| 4:143324091-143324207 | 14511 | 124.03 |
| 4:143326359-143326477 | 16388 | 137.71 |
| 4:143344963-143344970 | 0     | 0      |
| 4:143348605-143348630 | 875   | 33.65  |
| 4:143350326-143350370 | 1778  | 39.51  |
| 4:143352322-143352412 | 9603  | 105.53 |
| 4:153244033-153244301 | 76318 | 283.71 |
| 4:153245336-153245546 | 21368 | 101.27 |
| 4:153247158-153247383 | 57076 | 252.55 |
| 4:153249360-153249541 | 80013 | 439.63 |
| 4:153250824-153250937 | 25729 | 225.69 |
| 4:153251884-153252020 | 27450 | 200.36 |
| 4:153253748-153253871 | 8721  | 70.33  |
| 4:153258954-153259088 | 13741 | 101.79 |
| 4:153268082-153268223 | 22205 | 156.37 |
| 4:153269826-153269881 | 0     | 0      |
| 4:153271194-153271276 | 1059  | 12.76  |
| 4:153273622-153273882 | 17499 | 67.05  |
| 4:153303341-153303487 | 12872 | 87.56  |
| 4:153332455-153332955 | 74596 | 148.89 |
| 5:1253843-1253946     | 1618  | 15.56  |
| 5:1254483-1254620     | 7323  | 53.07  |
| 5:1255402-1255526     | 3297  | 26.38  |
| 5:1258713-1258774     | 496   | 8      |
| 5:1260589-1260715     | 8864  | 69.8   |
| 5:1264519-1264707     | 9037  | 47.81  |
| 5:1266579-1266650     | 1893  | 26.29  |

© 2015 American Medical Association. All rights reserved.

|                     |        |        |
|---------------------|--------|--------|
| 5:1268635-1268748   | 4822   | 42.3   |
| 5:1271234-1271319   | 2443   | 28.41  |
| 5:1272300-1272395   | 3233   | 33.68  |
| 5:1278756-1278911   | 42104  | 269.9  |
| 5:1279406-1279585   | 400    | 2.22   |
| 5:1280273-1280453   | 14232  | 78.63  |
| 5:1282544-1282739   | 8259   | 42.14  |
| 5:1293428-1294781   | 10539  | 7.78   |
| 5:1294886-1295104   | 133    | 0.61   |
| 5:35857080-35857161 | 14610  | 178.17 |
| 5:35860954-35861092 | 45748  | 329.12 |
| 5:35867408-35867639 | 11871  | 51.17  |
| 5:35871158-35871315 | 9086   | 57.51  |
| 5:35873582-35873750 | 13391  | 79.24  |
| 5:35874551-35874644 | 15028  | 159.87 |
| 5:35875516-35875693 | 8801   | 49.44  |
| 5:35876085-35876588 | 43069  | 85.45  |
| 5:38942406-38942480 | 20454  | 272.72 |
| 5:38942935-38943073 | 15181  | 109.22 |
| 5:38944548-38944671 | 21405  | 172.62 |
| 5:38945015-38945170 | 35923  | 230.28 |
| 5:38945593-38945826 | 32176  | 137.5  |
| 5:38946570-38946654 | 16251  | 191.19 |
| 5:38947366-38947543 | 33643  | 189.01 |
| 5:38949458-38949529 | 5181   | 71.96  |
| 5:38949814-38950822 | 276498 | 274.03 |
| 5:38952298-38952527 | 31636  | 137.55 |
| 5:38953087-38953193 | 20156  | 188.37 |
| 5:38953563-38953655 | 23132  | 248.73 |
| 5:38954876-38954963 | 14458  | 164.3  |
| 5:38955697-38955806 | 26475  | 240.68 |
| 5:38957754-38957832 | 14088  | 178.33 |
| 5:38958545-38958621 | 17912  | 232.62 |
| 5:38958769-38958933 | 16666  | 101.01 |
| 5:38959297-38959423 | 9989   | 78.65  |
| 5:38959881-38960080 | 43776  | 218.88 |
| 5:38960500-38960635 | 22188  | 163.15 |
| 5:38962417-38962463 | 2470   | 52.55  |
| 5:38962587-38962688 | 6507   | 63.79  |
| 5:38962978-38963143 | 19415  | 116.96 |
| 5:38964894-38964994 | 13296  | 131.64 |

© 2015 American Medical Association. All rights reserved.

|                     |        |        |
|---------------------|--------|--------|
| 5:38966743-38966823 | 8111   | 100.14 |
| 5:38967263-38967329 | 31844  | 475.28 |
| 5:38967439-38967529 | 10551  | 115.95 |
| 5:38968045-38968132 | 13573  | 154.24 |
| 5:38971979-38972061 | 5277   | 63.58  |
| 5:38975639-38975706 | 6200   | 91.18  |
| 5:38978685-38978752 | 3656   | 53.76  |
| 5:38981969-38982138 | 34909  | 205.35 |
| 5:38991051-38991177 | 12998  | 102.35 |
| 5:38996921-38996984 | 27770  | 433.91 |
| 5:39002637-39002768 | 14854  | 112.53 |
| 5:39003660-39003724 | 9399   | 144.6  |
| 5:39021141-39021238 | 20316  | 207.31 |
| 5:39074213-39074260 | 3478   | 72.46  |
| 5:39074431-39074479 | 69     | 1.41   |
| 5:55236910-55237647 | 132498 | 179.54 |
| 5:55238498-55238579 | 6719   | 81.94  |
| 5:55243321-55243417 | 10265  | 105.82 |
| 5:55246018-55246031 | 248    | 17.71  |
| 5:55247292-55247432 | 29116  | 206.5  |
| 5:55247757-55247903 | 6942   | 47.22  |
| 5:55248078-55248179 | 8496   | 83.29  |
| 5:55250638-55250820 | 46362  | 253.34 |
| 5:55251853-55252063 | 41430  | 196.35 |
| 5:55253037-55253119 | 7284   | 87.76  |
| 5:55255471-55255499 | 0      | 0      |
| 5:55256230-55256389 | 31956  | 199.73 |
| 5:55259180-55259334 | 11353  | 73.25  |
| 5:55259974-55260140 | 23786  | 142.43 |
| 5:55264104-55264224 | 17157  | 141.79 |
| 5:55265378-55265683 | 25833  | 84.42  |
| 5:55272043-55272106 | 4653   | 72.7   |
| 5:56111401-56111882 | 0      | 0      |
| 5:56152427-56152577 | 16272  | 107.76 |
| 5:56155542-56155742 | 7349   | 36.56  |
| 5:56160561-56160761 | 23954  | 119.17 |
| 5:56161167-56161283 | 9038   | 77.25  |
| 5:56161656-56161804 | 17726  | 118.97 |
| 5:56167737-56167858 | 13438  | 110.15 |
| 5:56168468-56168549 | 6512   | 79.41  |
| 5:56168652-56168832 | 11267  | 62.25  |

© 2015 American Medical Association. All rights reserved.

|                     |        |        |
|---------------------|--------|--------|
| 5:56170859-56171137 | 35557  | 127.44 |
| 5:56174807-56174928 | 20529  | 168.27 |
| 5:56176538-56176629 | 8899   | 96.73  |
| 5:56176910-56177099 | 10308  | 54.25  |
| 5:56177397-56178693 | 136487 | 105.23 |
| 5:56179354-56179506 | 20641  | 134.91 |
| 5:56180491-56180653 | 10205  | 62.61  |
| 5:56181759-56181890 | 13538  | 102.56 |
| 5:56183205-56183347 | 27377  | 191.45 |
| 5:56184053-56184184 | 11780  | 89.24  |
| 5:56189358-56189507 | 10432  | 69.55  |
| 5:65288547-65288735 | 21257  | 112.47 |
| 5:65290575-65290692 | 5812   | 49.25  |
| 5:65307877-65307955 | 3070   | 38.86  |
| 5:65309377-65309466 | 11962  | 132.91 |
| 5:65310497-65310553 | 1607   | 28.19  |
| 5:65317150-65317213 | 4636   | 72.44  |
| 5:65319118-65319192 | 15060  | 200.8  |
| 5:65320134-65320278 | 13529  | 93.3   |
| 5:65321308-65321380 | 13402  | 183.59 |
| 5:65321676-65321805 | 5913   | 45.48  |
| 5:65322130-65322245 | 10689  | 92.15  |
| 5:65324102-65324171 | 5453   | 77.9   |
| 5:65334211-65334310 | 11465  | 114.65 |
| 5:65338905-65339026 | 5459   | 44.75  |
| 5:65339965-65340138 | 16164  | 92.9   |
| 5:65342181-65342366 | 29483  | 158.51 |
| 5:65344495-65344609 | 7549   | 65.64  |
| 5:65346611-65346794 | 23805  | 129.38 |
| 5:65349234-65350779 | 158101 | 102.26 |
| 5:65364705-65364848 | 0      | 0      |
| 5:65367997-65368122 | 0      | 0      |
| 5:65370852-65371058 | 39615  | 191.38 |
| 5:65372144-65372236 | 9760   | 104.95 |
| 5:65372703-65372777 | 10816  | 144.21 |
| 5:65374251-65374358 | 8038   | 74.43  |
| 5:67522504-67522837 | 31176  | 93.34  |
| 5:67535726-67535765 | 0      | 0      |
| 5:67569218-67569310 | 38035  | 408.98 |
| 5:67569767-67569841 | 12816  | 170.88 |
| 5:67575430-67575561 | 17085  | 129.43 |

© 2015 American Medical Association. All rights reserved.



|                       |        |        |
|-----------------------|--------|--------|
| 5:67576356-67576557   | 31808  | 157.47 |
| 5:67576755-67576834   | 5541   | 69.26  |
| 5:67584564-67584579   | 1664   | 104    |
| 5:67586557-67586662   | 11955  | 112.78 |
| 5:67588087-67588189   | 18605  | 180.63 |
| 5:67588314-67588351   | 3      | 0.08   |
| 5:67588929-67589027   | 7653   | 77.3   |
| 5:67589131-67589311   | 15291  | 84.48  |
| 5:67589537-67589662   | 7462   | 59.22  |
| 5:67590364-67590506   | 7933   | 55.48  |
| 5:67590976-67591152   | 19356  | 109.36 |
| 5:67591248-67591316   | 10940  | 158.55 |
| 5:67591975-67592169   | 33993  | 174.32 |
| 5:67593240-67593429   | 53115  | 279.55 |
| 5:112043415-112043579 | 83     | 0.5    |
| 5:112090588-112090722 | 10184  | 75.44  |
| 5:112102023-112102107 | 7969   | 93.75  |
| 5:112102886-112103087 | 20664  | 102.3  |
| 5:112111326-112111434 | 7580   | 69.54  |
| 5:112116487-112116600 | 7473   | 65.55  |
| 5:112128143-112128226 | 7241   | 86.2   |
| 5:112136976-112137080 | 10199  | 97.13  |
| 5:112145823-112145852 | 0      | 0      |
| 5:112151192-112151290 | 11955  | 120.76 |
| 5:112154663-112155041 | 47085  | 124.23 |
| 5:112157593-112157688 | 8485   | 88.39  |
| 5:112162805-112162944 | 13547  | 96.76  |
| 5:112163626-112163703 | 4371   | 56.04  |
| 5:112170648-112170862 | 23526  | 109.42 |
| 5:112173250-112179823 | 590344 | 89.8   |
| 5:138117614-138117718 | 6479   | 61.7   |
| 5:138117979-138118041 | 0      | 0      |
| 5:138118866-138119063 | 10107  | 51.05  |
| 5:138145727-138145893 | 24678  | 147.77 |
| 5:138147872-138147991 | 6294   | 52.45  |
| 5:138160219-138160488 | 27616  | 102.28 |
| 5:138163204-138163407 | 13660  | 66.96  |
| 5:138216731-138216793 | 0      | 0      |
| 5:138221901-138221981 | 8483   | 104.73 |
| 5:138223179-138223331 | 27569  | 180.19 |
| 5:138240038-138240130 | 7578   | 81.48  |

© 2015 American Medical Association. All rights reserved.

|                       |       |        |
|-----------------------|-------|--------|
| 5:138253431-138253587 | 46589 | 296.75 |
| 5:138260199-138260399 | 8705  | 43.31  |
| 5:138260945-138261096 | 11296 | 74.32  |
| 5:138264935-138265045 | 9077  | 81.77  |
| 5:138266162-138266343 | 24536 | 134.81 |
| 5:138266519-138266624 | 10649 | 100.46 |
| 5:138268267-138268401 | 7478  | 55.39  |
| 5:138268577-138268647 | 3459  | 48.72  |
| 5:138269491-138269778 | 9982  | 34.66  |
| 5:142150327-142150480 | 8074  | 52.43  |
| 5:142152346-142152415 | 16287 | 232.67 |
| 5:142252965-142253060 | 5061  | 52.72  |
| 5:142254675-142254736 | 7434  | 119.9  |
| 5:142258939-142259010 | 11636 | 161.61 |
| 5:142264863-142264964 | 5862  | 57.47  |
| 5:142273803-142273913 | 6757  | 60.87  |
| 5:142281500-142281604 | 9414  | 89.66  |
| 5:142283105-142283234 | 9124  | 70.18  |
| 5:142287269-142287369 | 16992 | 168.24 |
| 5:142292764-142292858 | 19618 | 206.51 |
| 5:142311612-142311690 | 10079 | 127.58 |
| 5:142393645-142393681 | 4105  | 110.95 |
| 5:142416761-142416826 | 5763  | 87.32  |
| 5:142421381-142421455 | 2352  | 31.36  |
| 5:142434004-142434091 | 22481 | 255.47 |
| 5:142435593-142435651 | 8926  | 151.29 |
| 5:142437207-142437312 | 12876 | 121.47 |
| 5:142437423-142437606 | 83    | 0.45   |
| 5:142500553-142500712 | 30096 | 188.1  |
| 5:142513532-142513670 | 31810 | 228.85 |
| 5:142526796-142526946 | 22106 | 146.4  |
| 5:142545592-142545652 | 0     | 0      |
| 5:142586763-142587038 | 40908 | 148.22 |
| 5:142593562-142593653 | 1954  | 21.24  |
| 5:142595752-142595846 | 0     | 0      |
| 5:142601923-142602036 | 7595  | 66.62  |
| 5:149433632-149433793 | 4847  | 29.92  |
| 5:149433885-149433993 | 8174  | 74.99  |
| 5:149434800-149434899 | 6040  | 60.4   |
| 5:149435589-149435700 | 6390  | 57.05  |
| 5:149435782-149435904 | 12861 | 104.56 |

© 2015 American Medical Association. All rights reserved.

|                       |       |        |
|-----------------------|-------|--------|
| 5:149436850-149436947 | 1946  | 19.86  |
| 5:149437067-149437155 | 4325  | 48.6   |
| 5:149437824-149437834 | 0     | 0      |
| 5:149439263-149439425 | 8721  | 53.5   |
| 5:149440425-149440535 | 1196  | 10.77  |
| 5:149441054-149441231 | 9927  | 55.77  |
| 5:149441286-149441412 | 13397 | 105.49 |
| 5:149447778-149447893 | 9615  | 82.89  |
| 5:149449436-149449626 | 9900  | 51.83  |
| 5:149449745-149449865 | 4024  | 33.26  |
| 5:149450019-149450134 | 347   | 2.99   |
| 5:149452864-149453056 | 26939 | 139.58 |
| 5:149456839-149456998 | 26614 | 166.34 |
| 5:149457675-149457811 | 14058 | 102.61 |
| 5:149459615-149459899 | 16644 | 58.4   |
| 5:149460330-149460587 | 10283 | 39.86  |
| 5:149465942-149465990 | 691   | 14.1   |
| 5:149495326-149495509 | 1445  | 7.85   |
| 5:149497181-149497413 | 9993  | 42.89  |
| 5:149498310-149498415 | 13241 | 124.92 |
| 5:149499030-149499129 | 16207 | 162.07 |
| 5:149499575-149499686 | 6578  | 58.73  |
| 5:149500451-149500573 | 7807  | 63.47  |
| 5:149500767-149500885 | 8370  | 70.34  |
| 5:149501443-149501603 | 10597 | 65.82  |
| 5:149502605-149502764 | 13568 | 84.8   |
| 5:149503813-149503923 | 4682  | 42.18  |
| 5:149504290-149504394 | 1439  | 13.7   |
| 5:149505008-149505140 | 10568 | 79.46  |
| 5:149506083-149506177 | 7270  | 76.53  |
| 5:149509320-149509531 | 15421 | 72.74  |
| 5:149510102-149510225 | 17066 | 137.63 |
| 5:149511542-149511657 | 5863  | 50.54  |
| 5:149512313-149512505 | 1338  | 6.93   |
| 5:149513149-149513323 | 34244 | 195.68 |
| 5:149513444-149513571 | 15364 | 120.03 |
| 5:149514279-149514579 | 21833 | 72.53  |
| 5:149515118-149515441 | 15871 | 48.98  |
| 5:149516571-149516610 | 1241  | 31.03  |
| 5:149546415-149546884 | 615   | 1.31   |
| 5:149562331-149562476 | 16158 | 110.67 |

© 2015 American Medical Association. All rights reserved.

|                       |       |        |
|-----------------------|-------|--------|
| 5:149563037-149563243 | 4609  | 22.27  |
| 5:170814953-170815010 | 3730  | 64.31  |
| 5:170817055-170817134 | 3157  | 39.46  |
| 5:170818309-170818428 | 23665 | 197.21 |
| 5:170818710-170818803 | 7571  | 80.54  |
| 5:170819714-170819820 | 8421  | 78.7   |
| 5:170819918-170819982 | 1266  | 19.48  |
| 5:170827157-170827214 | 3321  | 57.26  |
| 5:170827843-170827929 | 6888  | 79.17  |
| 5:170832306-170832407 | 811   | 7.95   |
| 5:170833401-170833409 | 912   | 101.33 |
| 5:170834704-170834778 | 5326  | 71.01  |
| 5:170837531-170837569 | 1211  | 31.05  |
| 5:176516604-176516694 | 1338  | 14.7   |
| 5:176516859-176516941 | 34    | 0.41   |
| 5:176517070-176517156 | 64    | 0.74   |
| 5:176517159-176517654 | 8173  | 16.48  |
| 5:176517746-176518105 | 10022 | 27.84  |
| 5:176518686-176518809 | 7175  | 57.86  |
| 5:176519322-176519512 | 1804  | 9.45   |
| 5:176519647-176520063 | 8432  | 20.22  |
| 5:176520069-176520552 | 26272 | 54.28  |
| 5:176520655-176520776 | 2098  | 17.2   |
| 5:176522331-176522441 | 6057  | 54.57  |
| 5:176522534-176522724 | 989   | 5.18   |
| 5:176523058-176523180 | 4704  | 38.24  |
| 5:176523288-176523358 | 3027  | 42.63  |
| 5:176523605-176523742 | 3199  | 23.18  |
| 5:176524293-176524398 | 1258  | 11.87  |
| 5:176524528-176524677 | 8711  | 58.07  |
| 5:180030192-180030390 | 4746  | 23.85  |
| 5:180035132-180035159 | 0     | 0      |
| 5:180035281-180035284 | 0     | 0      |
| 5:180035968-180036053 | 5178  | 60.21  |
| 5:180036905-180037025 | 7852  | 64.89  |
| 5:180038331-180038479 | 9167  | 61.52  |
| 5:180039506-180039611 | 4075  | 38.44  |
| 5:180040011-180040110 | 5322  | 53.22  |
| 5:180041068-180041179 | 8109  | 72.4   |
| 5:180043367-180043489 | 6496  | 52.81  |
| 5:180043900-180043994 | 3458  | 36.4   |

© 2015 American Medical Association. All rights reserved.

|                       |       |        |
|-----------------------|-------|--------|
| 5:180045770-180045920 | 327   | 2.17   |
| 5:180046021-180046109 | 103   | 1.16   |
| 5:180046253-180046366 | 2175  | 19.08  |
| 5:180046454-180046489 | 253   | 7.03   |
| 5:180046495-180046769 | 12227 | 44.46  |
| 5:180047173-180047308 | 11807 | 86.82  |
| 5:180047609-180047715 | 2786  | 26.04  |
| 5:180047876-180048007 | 1520  | 11.52  |
| 5:180048106-180048252 | 5388  | 36.65  |
| 5:180048542-180048904 | 14501 | 39.95  |
| 5:180049731-180049839 | 5405  | 49.59  |
| 5:180050935-180051061 | 6725  | 52.95  |
| 5:180052869-180053031 | 6564  | 40.27  |
| 5:180053111-180053265 | 9999  | 64.51  |
| 5:180055882-180055999 | 2400  | 20.34  |
| 5:180056259-180056427 | 4337  | 25.66  |
| 5:180056696-180056835 | 1739  | 12.42  |
| 5:180056943-180057105 | 8867  | 54.4   |
| 5:180057225-180057337 | 5650  | 50     |
| 5:180057555-180057799 | 11128 | 45.42  |
| 5:180058682-180058778 | 7199  | 74.22  |
| 5:180076488-180076545 | 119   | 2.05   |
| 6:32163214-32163927   | 29332 | 41.08  |
| 6:32164101-32164198   | 10868 | 110.9  |
| 6:32164702-32164849   | 30449 | 205.74 |
| 6:32165076-32165371   | 18015 | 60.86  |
| 6:32166198-32166336   | 4397  | 31.63  |
| 6:32166426-32166507   | 1803  | 21.99  |
| 6:32166703-32166922   | 13693 | 62.24  |
| 6:32168608-32168783   | 3390  | 19.26  |
| 6:32168894-32169277   | 25118 | 65.41  |
| 6:32169853-32170376   | 23891 | 45.59  |
| 6:32171547-32171659   | 487   | 4.31   |
| 6:32171914-32172166   | 8535  | 33.74  |
| 6:32178529-32178713   | 8024  | 43.37  |
| 6:32180251-32180404   | 15067 | 97.84  |
| 6:32180601-32180688   | 243   | 2.76   |
| 6:32180912-32181029   | 4645  | 39.36  |
| 6:32181465-32181617   | 7294  | 47.67  |
| 6:32181887-32182032   | 17563 | 120.29 |
| 6:32183003-32183162   | 1838  | 11.49  |

© 2015 American Medical Association. All rights reserved.

|                     |       |        |
|---------------------|-------|--------|
| 6:32184722-32184844 | 5291  | 43.02  |
| 6:32184930-32185043 | 4864  | 42.67  |
| 6:32185772-32185885 | 5400  | 47.37  |
| 6:32187369-32187563 | 6386  | 32.75  |
| 6:32187906-32188061 | 5561  | 35.65  |
| 6:32188182-32188418 | 27973 | 118.03 |
| 6:32188533-32188655 | 15270 | 124.15 |
| 6:32188755-32189102 | 13477 | 38.73  |
| 6:32190288-32190583 | 12541 | 42.37  |
| 6:32190782-32190863 | 14387 | 175.45 |
| 6:32191633-32191705 | 3522  | 48.25  |
| 6:33286520-33286579 | 4673  | 77.88  |
| 6:33286774-33286996 | 28438 | 127.52 |
| 6:33287157-33287631 | 31087 | 65.45  |
| 6:33287788-33288001 | 7932  | 37.07  |
| 6:33288157-33288368 | 11884 | 56.06  |
| 6:33288513-33289344 | 52611 | 63.23  |
| 6:33289496-33289702 | 30225 | 146.01 |
| 6:35420323-35420570 | 73    | 0.29   |
| 6:35423524-35424130 | 46932 | 77.32  |
| 6:35425333-35425377 | 1173  | 26.07  |
| 6:35425693-35425761 | 3596  | 52.12  |
| 6:35426074-35426217 | 20362 | 141.4  |
| 6:35427108-35427231 | 13241 | 106.78 |
| 6:35427459-35427537 | 10155 | 128.54 |
| 6:35428329-35428395 | 3917  | 58.46  |
| 6:35430566-35430691 | 10123 | 80.34  |
| 6:35434021-35434122 | 6282  | 61.59  |
| 6:36645614-36645710 | 0     | 0      |
| 6:36651874-36652323 | 15264 | 33.92  |
| 6:36653528-36653577 | 7108  | 142.16 |
| 6:41903589-41903845 | 4730  | 18.4   |
| 6:41904282-41904433 | 6655  | 43.78  |
| 6:41904973-41905132 | 12731 | 79.57  |
| 6:41908108-41908323 | 21031 | 97.37  |
| 6:41908690-41908737 | 5197  | 108.27 |
| 6:41909190-41909387 | 3275  | 16.54  |
| 6:91226220-91226400 | 17357 | 95.9   |
| 6:91228166-91228281 | 10283 | 88.65  |
| 6:91228977-91229038 | 6599  | 106.44 |
| 6:91233397-91233502 | 12385 | 116.84 |

© 2015 American Medical Association. All rights reserved.

|                       |        |        |
|-----------------------|--------|--------|
| 6:91246056-91246120   | 6461   | 99.4   |
| 6:91254271-91254351   | 12165  | 150.19 |
| 6:91256977-91257106   | 31814  | 244.72 |
| 6:91257766-91257896   | 11444  | 87.36  |
| 6:91260187-91260268   | 7901   | 96.35  |
| 6:91261768-91261898   | 11943  | 91.17  |
| 6:91263177-91263305   | 14211  | 110.16 |
| 6:91266219-91266343   | 20579  | 164.63 |
| 6:91269795-91269933   | 15391  | 110.73 |
| 6:91271341-91271386   | 5342   | 116.13 |
| 6:91278277-91278342   | 3733   | 56.56  |
| 6:91281416-91281526   | 7851   | 70.73  |
| 6:91296483-91296602   | 3297   | 27.48  |
| 6:106534429-106534470 | 0      | 0      |
| 6:106536076-106536324 | 28857  | 115.89 |
| 6:106543490-106543609 | 8446   | 70.38  |
| 6:106546549-106546596 | 0      | 0      |
| 6:106546961-106546969 | 390    | 43.33  |
| 6:106547175-106547427 | 27473  | 108.59 |
| 6:106552700-106553808 | 116395 | 104.95 |
| 6:106554246-106554374 | 12874  | 99.8   |
| 6:106554786-106555361 | 92846  | 161.19 |
| 6:117609655-117609965 | 24131  | 77.59  |
| 6:117622137-117622300 | 17625  | 107.47 |
| 6:117629957-117630091 | 11449  | 84.81  |
| 6:117631244-117631444 | 33053  | 164.44 |
| 6:117632183-117632280 | 12253  | 125.03 |
| 6:117638306-117638435 | 25064  | 192.8  |
| 6:117639351-117639415 | 5282   | 81.26  |
| 6:117641031-117641193 | 24010  | 147.3  |
| 6:117642422-117642557 | 34434  | 253.19 |
| 6:117645495-117645578 | 4327   | 51.51  |
| 6:117647387-117647577 | 18133  | 94.94  |
| 6:117649970-117649976 | 1979   | 282.71 |
| 6:117650492-117650609 | 17539  | 148.64 |
| 6:117658335-117658503 | 9598   | 56.79  |
| 6:117662298-117662474 | 18649  | 105.36 |
| 6:117662563-117662795 | 31326  | 134.45 |
| 6:117663563-117663707 | 7793   | 53.74  |
| 6:117665223-117665425 | 22316  | 109.93 |
| 6:117674153-117674332 | 19336  | 107.42 |

© 2015 American Medical Association. All rights reserved.

|                       |       |        |
|-----------------------|-------|--------|
| 6:117677792-117678078 | 37954 | 132.24 |
| 6:117678967-117679172 | 13151 | 63.84  |
| 6:117680972-117681174 | 27359 | 134.77 |
| 6:117681505-117681568 | 3193  | 49.89  |
| 6:117683766-117684028 | 23780 | 90.42  |
| 6:117686223-117686367 | 11594 | 79.96  |
| 6:117686744-117686904 | 7201  | 44.73  |
| 6:117687239-117687453 | 38140 | 177.4  |
| 6:117700222-117700322 | 8630  | 85.45  |
| 6:117704480-117704671 | 58512 | 304.75 |
| 6:117706846-117707024 | 20903 | 116.78 |
| 6:117708052-117708162 | 12800 | 115.32 |
| 6:117708943-117709197 | 49800 | 195.29 |
| 6:117710513-117711009 | 49871 | 100.34 |
| 6:117714387-117714484 | 49458 | 504.67 |
| 6:117715325-117715509 | 13716 | 74.14  |
| 6:117715779-117715901 | 9745  | 79.23  |
| 6:117717351-117717427 | 13809 | 179.34 |
| 6:117718078-117718279 | 29271 | 144.91 |
| 6:117724302-117724440 | 11369 | 81.79  |
| 6:117725443-117725591 | 12146 | 81.52  |
| 6:117730745-117730805 | 5616  | 92.07  |
| 6:117735682-117735708 | 939   | 34.78  |
| 6:117737421-117737480 | 5619  | 93.65  |
| 6:117739625-117739669 | 3901  | 86.69  |
| 6:117746697-117746819 | 23792 | 193.43 |
| 6:117884417-117884547 | 14560 | 111.15 |
| 6:117888017-117888197 | 18543 | 102.45 |
| 6:117890735-117890899 | 58278 | 353.2  |
| 6:117892023-117892118 | 4828  | 50.29  |
| 6:117894630-117894799 | 26933 | 158.43 |
| 6:117896340-117896515 | 18629 | 105.85 |
| 6:117896677-117896692 | 1315  | 82.19  |
| 6:117898611-117898634 | 583   | 24.29  |
| 6:117900055-117900227 | 13281 | 76.77  |
| 6:117923167-117923451 | 21064 | 73.91  |
| 6:134491406-134491573 | 10260 | 61.07  |
| 6:134491964-134492053 | 17490 | 194.33 |
| 6:134492161-134492316 | 15352 | 98.41  |
| 6:134492775-134492870 | 5132  | 53.46  |
| 6:134493331-134493454 | 29353 | 236.72 |

© 2015 American Medical Association. All rights reserved.



|                       |       |        |
|-----------------------|-------|--------|
| 6:134493800-134493912 | 5699  | 50.43  |
| 6:134494161-134494292 | 22779 | 172.57 |
| 6:134494412-134494495 | 5893  | 70.15  |
| 6:134494600-134494704 | 10860 | 103.43 |
| 6:134495143-134495218 | 11052 | 145.42 |
| 6:134495649-134495770 | 6566  | 53.82  |
| 6:134495870-134495945 | 14706 | 193.5  |
| 6:134496682-134496799 | 651   | 5.52   |
| 6:134498801-134498960 | 7924  | 49.53  |
| 6:134528494-134528569 | 2894  | 38.08  |
| 6:134536193-134536231 | 0     | 0      |
| 6:134582894-134583286 | 37038 | 94.24  |
| 6:134638530-134638598 | 15155 | 219.64 |
| 6:136878896-136878956 | 8995  | 147.46 |
| 6:136879938-136880014 | 14445 | 187.6  |
| 6:136882671-136882783 | 9898  | 87.59  |
| 6:136883641-136883753 | 15027 | 132.98 |
| 6:136888769-136889012 | 18407 | 75.44  |
| 6:136900967-136900977 | 0     | 0      |
| 6:136901439-136901544 | 13475 | 127.12 |
| 6:136904693-136904878 | 24323 | 130.77 |
| 6:136913311-136913479 | 23307 | 137.91 |
| 6:136913575-136913761 | 22720 | 121.5  |
| 6:136914837-136914848 | 0     | 0      |
| 6:136922160-136922180 | 1031  | 49.1   |
| 6:136922940-136923117 | 11034 | 61.99  |
| 6:136926347-136926504 | 12350 | 78.16  |
| 6:136932420-136932525 | 23940 | 225.85 |
| 6:136934258-136934394 | 15937 | 116.33 |
| 6:136935297-136935424 | 15996 | 124.97 |
| 6:136943986-136944119 | 30586 | 228.25 |
| 6:136958463-136958544 | 9267  | 113.01 |
| 6:136960681-136960776 | 3343  | 34.82  |
| 6:136963658-136963707 | 13497 | 269.94 |
| 6:136972122-136972229 | 4555  | 42.18  |
| 6:136977445-136977598 | 26667 | 173.16 |
| 6:136980357-136980516 | 12264 | 76.65  |
| 6:136990421-136990533 | 17422 | 154.18 |
| 6:137015278-137015448 | 13115 | 76.7   |
| 6:137017089-137017195 | 8562  | 80.02  |
| 6:137018357-137018525 | 26171 | 154.86 |

© 2015 American Medical Association. All rights reserved.

|                       |       |        |
|-----------------------|-------|--------|
| 6:137019627-137019820 | 15151 | 78.1   |
| 6:137026248-137026271 | 1069  | 44.54  |
| 6:137041588-137041727 | 18342 | 131.01 |
| 6:137112848-137113535 | 21476 | 31.22  |
| 6:138192365-138192659 | 44493 | 150.82 |
| 6:138195982-138196172 | 25242 | 132.16 |
| 6:138196825-138196972 | 31367 | 211.94 |
| 6:138197133-138197303 | 20038 | 117.18 |
| 6:138197413-138197417 | 5     | 1      |
| 6:138198213-138198393 | 20340 | 112.38 |
| 6:138199569-138200488 | 68728 | 74.7   |
| 6:138201208-138201389 | 14687 | 80.7   |
| 6:138202172-138202456 | 38545 | 135.25 |
| 6:152129048-152129499 | 7477  | 16.54  |
| 6:152130242-152130407 | 0     | 0      |
| 6:152163732-152163922 | 14248 | 74.6   |
| 6:152201790-152201906 | 6214  | 53.11  |
| 6:152265308-152265643 | 41290 | 122.89 |
| 6:152332791-152332929 | 16906 | 121.63 |
| 6:152382126-152382259 | 13658 | 101.93 |
| 6:152415520-152415703 | 22430 | 121.9  |
| 6:152419867-152420101 | 16068 | 68.37  |
| 6:152446401-152446483 | 0     | 0      |
| 6:161771131-161771243 | 4627  | 40.95  |
| 6:161781120-161781237 | 13433 | 113.84 |
| 6:161791005-161791019 | 0     | 0      |
| 6:161807826-161807909 | 12176 | 144.95 |
| 6:161966446-161966469 | 1481  | 61.71  |
| 6:161969886-161970035 | 22993 | 153.29 |
| 6:161990387-161990448 | 5197  | 83.82  |
| 6:162204698-162204717 | 4729  | 236.45 |
| 6:162206804-162206940 | 10557 | 77.06  |
| 6:162394334-162394449 | 9905  | 85.39  |
| 6:162475123-162475206 | 10930 | 130.12 |
| 6:162622163-162622284 | 13735 | 112.58 |
| 6:162683493-162683502 | 1082  | 108.2  |
| 6:162683550-162683797 | 20076 | 80.95  |
| 6:162864342-162864509 | 24799 | 147.61 |
| 6:163148694-163148700 | 104   | 14.86  |
| 7:2946272-2946476     | 11642 | 56.79  |
| 7:2949684-2949799     | 12608 | 108.69 |

© 2015 American Medical Association. All rights reserved.

|                     |       |        |
|---------------------|-------|--------|
| 7:2951806-2951930   | 4973  | 39.78  |
| 7:2952921-2953100   | 7673  | 42.63  |
| 7:2954871-2955006   | 7355  | 54.08  |
| 7:2956924-2957019   | 1050  | 10.94  |
| 7:2958125-2958221   | 120   | 1.24   |
| 7:2959006-2959246   | 11436 | 47.45  |
| 7:2962268-2962394   | 5117  | 40.29  |
| 7:2962766-2962967   | 8366  | 41.42  |
| 7:2963867-2963999   | 6161  | 46.32  |
| 7:2966373-2966425   | 2587  | 48.81  |
| 7:2968232-2968332   | 5586  | 55.31  |
| 7:2969626-2969708   | 3220  | 38.8   |
| 7:2972169-2972220   | 1192  | 22.92  |
| 7:2974087-2974263   | 4922  | 27.81  |
| 7:2976671-2976868   | 11592 | 58.55  |
| 7:2977541-2977666   | 12268 | 97.37  |
| 7:2978313-2978465   | 6060  | 39.61  |
| 7:2979383-2979562   | 16887 | 93.82  |
| 7:2983846-2984171   | 26790 | 82.18  |
| 7:2985453-2985590   | 27316 | 197.94 |
| 7:2987209-2987421   | 31938 | 149.94 |
| 7:2998134-2998140   | 404   | 57.71  |
| 7:6013030-6013173   | 36786 | 255.46 |
| 7:6017219-6017388   | 8850  | 52.06  |
| 7:6018227-6018327   | 5472  | 54.18  |
| 7:6022455-6022622   | 18042 | 107.39 |
| 7:6026390-6027251   | 67790 | 78.64  |
| 7:6029431-6029586   | 14289 | 91.6   |
| 7:6031604-6031688   | 6632  | 78.02  |
| 7:6035165-6035264   | 12421 | 124.21 |
| 7:6036957-6037054   | 2606  | 26.59  |
| 7:6038739-6038906   | 19980 | 118.93 |
| 7:6042084-6042267   | 32130 | 174.62 |
| 7:6043321-6043423   | 8215  | 79.76  |
| 7:6043603-6043689   | 10605 | 121.9  |
| 7:6045523-6045662   | 60185 | 429.89 |
| 7:6048628-6048650   | 1225  | 53.26  |
| 7:13935491-13935712 | 6002  | 27.04  |
| 7:13940363-13940464 | 3389  | 33.23  |
| 7:13946055-13946224 | 3728  | 21.93  |
| 7:13947418-13947481 | 0     | 0      |

© 2015 American Medical Association. All rights reserved.

|                     |       |        |
|---------------------|-------|--------|
| 7:13949257-13949325 | 11611 | 168.28 |
| 7:13950864-13950932 | 3809  | 55.2   |
| 7:13971127-13971374 | 14283 | 57.59  |
| 7:13975333-13975521 | 43551 | 230.43 |
| 7:13978742-13978871 | 14214 | 109.34 |
| 7:14017052-14017105 | 516   | 9.56   |
| 7:14025741-14025801 | 789   | 12.93  |
| 7:14026263-14026310 | 3601  | 75.02  |
| 7:14027711-14027798 | 8603  | 97.76  |
| 7:14028305-14028391 | 16843 | 193.6  |
| 7:14028633-14028677 | 1817  | 40.38  |
| 7:32997186-32997406 | 1766  | 7.99   |
| 7:33003156-33003314 | 0     | 0      |
| 7:33014229-33014374 | 17717 | 121.35 |
| 7:33014794-33014983 | 15502 | 81.59  |
| 7:33015966-33016111 | 30893 | 211.6  |
| 7:33019189-33019195 | 0     | 0      |
| 7:33019976-33020165 | 47721 | 251.16 |
| 7:33028119-33028264 | 12200 | 83.56  |
| 7:33035775-33035961 | 29834 | 159.54 |
| 7:33039727-33039873 | 19613 | 133.42 |
| 7:33042288-33042451 | 4589  | 27.98  |
| 7:33044787-33044963 | 19203 | 108.49 |
| 7:50358658-50358697 | 8691  | 217.28 |
| 7:50367234-50367353 | 2936  | 24.47  |
| 7:50435704-50436068 | 0     | 0      |
| 7:50444231-50444491 | 18691 | 71.61  |
| 7:50450238-50450405 | 6514  | 38.77  |
| 7:50455043-50455168 | 2333  | 18.52  |
| 7:50459427-50459561 | 5928  | 43.91  |
| 7:50467616-50468325 | 21948 | 30.91  |
| 7:55086971-55087058 | 699   | 7.94   |
| 7:55209979-55210130 | 20991 | 138.1  |
| 7:55210998-55211181 | 20839 | 113.26 |
| 7:55214299-55214433 | 16513 | 122.32 |
| 7:55218987-55219055 | 9415  | 136.45 |
| 7:55220030-55220039 | 60    | 6      |
| 7:55220239-55220357 | 17223 | 144.73 |
| 7:55221704-55221845 | 18401 | 129.58 |
| 7:55223523-55223639 | 6655  | 56.88  |
| 7:55224226-55224352 | 17135 | 134.92 |

© 2015 American Medical Association. All rights reserved.

|                     |       |        |
|---------------------|-------|--------|
| 7:55224452-55224536 | 10405 | 122.41 |
| 7:55225356-55225446 | 6221  | 68.36  |
| 7:55227832-55228031 | 11207 | 56.04  |
| 7:55229192-55229324 | 14071 | 105.8  |
| 7:55231426-55231516 | 13253 | 145.64 |
| 7:55232973-55233130 | 16326 | 103.33 |
| 7:55236216-55236222 | 173   | 24.71  |
| 7:55238000-55238237 | 15980 | 67.14  |
| 7:55238868-55238906 | 4295  | 110.13 |
| 7:55240539-55240593 | 740   | 13.45  |
| 7:55240676-55240817 | 10246 | 72.15  |
| 7:55241614-55241736 | 6402  | 52.05  |
| 7:55242415-55242513 | 6383  | 64.47  |
| 7:55248986-55249171 | 20435 | 109.87 |
| 7:55259412-55259567 | 12457 | 79.85  |
| 7:55260459-55260534 | 7539  | 99.2   |
| 7:55266410-55266556 | 15357 | 104.47 |
| 7:55268009-55268106 | 10966 | 111.9  |
| 7:55268881-55269048 | 23386 | 139.2  |
| 7:55269428-55269475 | 8954  | 186.54 |
| 7:55270210-55270458 | 1677  | 6.73   |
| 7:55272949-55273310 | 20455 | 56.51  |
| 7:66453358-66453486 | 7322  | 56.76  |
| 7:66456124-66456288 | 8659  | 52.48  |
| 7:66458204-66458404 | 31996 | 159.18 |
| 7:66459199-66459328 | 20295 | 156.12 |
| 7:66460277-66460404 | 9002  | 70.33  |
| 7:81331897-81332073 | 22257 | 125.75 |
| 7:81334706-81334851 | 23196 | 158.88 |
| 7:81334963-81335069 | 13560 | 126.73 |
| 7:81335603-81335743 | 17822 | 126.4  |
| 7:81336606-81336680 | 6122  | 81.63  |
| 7:81339463-81339559 | 19270 | 198.66 |
| 7:81340797-81340835 | 2160  | 55.38  |
| 7:81346548-81346681 | 27254 | 203.39 |
| 7:81350061-81350163 | 9384  | 91.11  |
| 7:81355206-81355333 | 30286 | 236.61 |
| 7:81358921-81359095 | 30132 | 172.18 |
| 7:81372241-81372266 | 1474  | 56.69  |
| 7:81372669-81372787 | 15908 | 133.68 |
| 7:81374316-81374436 | 10939 | 90.4   |

© 2015 American Medical Association. All rights reserved.

|                       |        |        |
|-----------------------|--------|--------|
| 7:81381428-81381578   | 17109  | 113.3  |
| 7:81385307-81385379   | 0      | 0      |
| 7:81386501-81386619   | 12683  | 106.58 |
| 7:81388008-81388120   | 11277  | 99.8   |
| 7:81392023-81392188   | 14028  | 84.51  |
| 7:81399200-81399287   | 808    | 9.18   |
| 7:92244454-92244600   | 6692   | 45.52  |
| 7:92247386-92247521   | 6872   | 50.53  |
| 7:92252350-92252400   | 1058   | 20.75  |
| 7:92300740-92300849   | 13987  | 127.15 |
| 7:92354940-92355107   | 25162  | 149.77 |
| 7:92404010-92404145   | 17070  | 125.51 |
| 7:92462405-92462637   | 5491   | 23.57  |
| 7:106508007-106510001 | 191763 | 96.12  |
| 7:106512982-106513047 | 19061  | 288.8  |
| 7:106513158-106513383 | 32046  | 141.8  |
| 7:106515145-106515248 | 6143   | 59.07  |
| 7:106519964-106520110 | 13472  | 91.65  |
| 7:106522562-106522652 | 15014  | 164.99 |
| 7:106523478-106523608 | 21293  | 162.54 |
| 7:106524600-106524711 | 24220  | 216.25 |
| 7:106526580-106526737 | 9442   | 59.76  |
| 7:106545554-106545832 | 43294  | 155.18 |
| 7:116335811-116335853 | 0      | 0      |
| 7:116339125-116340338 | 222053 | 182.91 |
| 7:116371722-116371913 | 18569  | 96.71  |
| 7:116380004-116380138 | 26428  | 195.76 |
| 7:116380906-116381079 | 41601  | 239.09 |
| 7:116395409-116395569 | 11672  | 72.5   |
| 7:116397491-116397593 | 18858  | 183.09 |
| 7:116397692-116397828 | 16097  | 117.5  |
| 7:116398513-116398674 | 15701  | 96.92  |
| 7:116399391-116399544 | 8217   | 53.36  |
| 7:116403104-116403322 | 36033  | 164.53 |
| 7:116409699-116409920 | 14310  | 64.46  |
| 7:116411552-116411708 | 31466  | 200.42 |
| 7:116411903-116412043 | 14336  | 101.67 |
| 7:116414935-116415165 | 48323  | 209.19 |
| 7:116417443-116417523 | 19689  | 243.07 |
| 7:116418830-116419011 | 17464  | 95.96  |
| 7:116422042-116422151 | 7623   | 69.3   |

© 2015 American Medical Association. All rights reserved.

|                       |        |        |
|-----------------------|--------|--------|
| 7:116423358-116423523 | 15981  | 96.27  |
| 7:116435709-116435845 | 28930  | 211.17 |
| 7:116435941-116436178 | 43142  | 181.27 |
| 7:128828993-128829323 | 68     | 0.21   |
| 7:128843225-128843430 | 2002   | 9.72   |
| 7:128845044-128845253 | 5685   | 27.07  |
| 7:128845451-128845623 | 13373  | 77.3   |
| 7:128845991-128846210 | 35840  | 162.91 |
| 7:128846305-128846428 | 19299  | 155.64 |
| 7:128848600-128848692 | 3240   | 34.84  |
| 7:128849130-128849238 | 5922   | 54.33  |
| 7:128850204-128850389 | 12455  | 66.96  |
| 7:128850806-128850954 | 12394  | 83.18  |
| 7:128851224-128851246 | 23     | 1      |
| 7:128851477-128851611 | 10627  | 78.72  |
| 7:128851865-128852292 | 7575   | 17.7   |
| 7:138522651-138522905 | 3038   | 11.91  |
| 7:138524878-138525023 | 1360   | 9.32   |
| 7:138529062-138529219 | 6959   | 44.04  |
| 7:138536969-138537015 | 1510   | 32.13  |
| 7:138545885-138546202 | 14945  | 47     |
| 7:138552721-138552874 | 4310   | 27.99  |
| 7:138554284-138554507 | 3789   | 16.92  |
| 7:138555903-138556108 | 11956  | 58.04  |
| 7:138564284-138564399 | 0      | 0      |
| 7:138566134-138566330 | 13170  | 66.85  |
| 7:138579088-138579272 | 28974  | 156.62 |
| 7:138583701-138583878 | 41762  | 234.62 |
| 7:138588334-138588482 | 3572   | 23.97  |
| 7:138589768-138589827 | 207    | 3.45   |
| 7:138591665-138591848 | 15845  | 86.11  |
| 7:138593737-138593867 | 3531   | 26.95  |
| 7:138595892-138596069 | 1987   | 11.16  |
| 7:138597118-138597206 | 10743  | 120.71 |
| 7:138601494-138604221 | 191880 | 70.34  |
| 7:138665829-138666015 | 0      | 0      |
| 7:140426294-140426316 | 0      | 0      |
| 7:140434397-140434570 | 53099  | 305.17 |
| 7:140439612-140439746 | 6425   | 47.59  |
| 7:140447215-140447247 | 0      | 0      |
| 7:140449087-140449218 | 13698  | 103.77 |

© 2015 American Medical Association. All rights reserved.

|                       |       |        |
|-----------------------|-------|--------|
| 7:140453075-140453193 | 13449 | 113.02 |
| 7:140453987-140454033 | 7157  | 152.28 |
| 7:140476712-140476888 | 20773 | 117.36 |
| 7:140477791-140477875 | 9274  | 109.11 |
| 7:140481376-140481493 | 25521 | 216.28 |
| 7:140482821-140482957 | 6968  | 50.86  |
| 7:140487348-140487384 | 4760  | 128.65 |
| 7:140494108-140494267 | 26312 | 164.45 |
| 7:140500162-140500281 | 15738 | 131.15 |
| 7:140501212-140501360 | 7658  | 51.4   |
| 7:140507760-140507862 | 14162 | 137.5  |
| 7:140508095-140508116 | 0     | 0      |
| 7:140508692-140508795 | 13850 | 133.17 |
| 7:140534409-140534672 | 35984 | 136.3  |
| 7:140549911-140550012 | 17352 | 170.12 |
| 7:140624366-140624503 | 62    | 0.45   |
| 7:142560986-142561085 | 5110  | 51.1   |
| 7:142561389-142561453 | 9321  | 143.4  |
| 7:142561724-142562504 | 89885 | 115.09 |
| 7:142563230-142563385 | 5085  | 32.6   |
| 7:142563715-142564071 | 7890  | 22.1   |
| 7:142564236-142564360 | 9439  | 75.51  |
| 7:142564661-142564823 | 17959 | 110.18 |
| 7:142565363-142565477 | 2430  | 21.13  |
| 7:142565752-142565804 | 382   | 7.21   |
| 7:142565996-142566115 | 9638  | 80.32  |
| 7:142566247-142566494 | 6514  | 26.27  |
| 7:142566727-142566900 | 8092  | 46.51  |
| 7:142567570-142567719 | 9550  | 63.67  |
| 7:142567967-142568160 | 41705 | 214.97 |
| 7:142568283-142568438 | 14627 | 93.76  |
| 7:142568549-142568657 | 6774  | 62.15  |
| 7:148504738-148504798 | 1026  | 16.82  |
| 7:148506163-148506247 | 18277 | 215.02 |
| 7:148506402-148506482 | 13430 | 165.8  |
| 7:148507425-148507506 | 9003  | 109.79 |
| 7:148508717-148508812 | 8022  | 83.56  |
| 7:148511051-148511229 | 31525 | 176.12 |
| 7:148512006-148512131 | 11264 | 89.4   |
| 7:148512598-148512638 | 7363  | 179.59 |
| 7:148513776-148513870 | 7030  | 74     |

© 2015 American Medical Association. All rights reserved.



|                       |        |        |
|-----------------------|--------|--------|
| 7:148514314-148514483 | 10194  | 59.96  |
| 7:148514969-148515209 | 26841  | 111.37 |
| 7:148516131-148516151 | 0      | 0      |
| 7:148516688-148516779 | 15545  | 168.97 |
| 7:148523546-148523724 | 13727  | 76.69  |
| 7:148524256-148524358 | 13045  | 126.65 |
| 7:148525832-148525972 | 10313  | 73.14  |
| 7:148526820-148526940 | 7608   | 62.88  |
| 7:148529726-148529842 | 16647  | 142.28 |
| 7:148533914-148534092 | 0      | 0      |
| 7:148543562-148543690 | 11278  | 87.43  |
| 7:148544274-148544390 | 32204  | 275.25 |
| 7:151833917-151834009 | 14046  | 151.03 |
| 7:151835869-151835989 | 26909  | 222.39 |
| 7:151836271-151836344 | 10577  | 142.93 |
| 7:151836760-151836876 | 15484  | 132.34 |
| 7:151841798-151841966 | 28238  | 167.09 |
| 7:151842238-151842380 | 13250  | 92.66  |
| 7:151843684-151843820 | 7678   | 56.04  |
| 7:151845118-151846237 | 114725 | 102.43 |
| 7:151847985-151848092 | 11280  | 104.44 |
| 7:151848527-151848666 | 8315   | 59.39  |
| 7:151849790-151850039 | 55811  | 223.24 |
| 7:151851095-151851231 | 13647  | 99.61  |
| 7:151851352-151851530 | 25948  | 144.96 |
| 7:151852995-151853142 | 7924   | 53.54  |
| 7:151853290-151853431 | 28652  | 201.77 |
| 7:151854846-151855010 | 1992   | 12.07  |
| 7:151855942-151856157 | 44497  | 206    |
| 7:151859202-151860911 | 282026 | 164.93 |
| 7:151864231-151864463 | 34212  | 146.83 |
| 7:151866271-151866334 | 6026   | 94.16  |
| 7:151868349-151868427 | 3484   | 44.1   |
| 7:151871216-151871327 | 7089   | 63.29  |
| 7:151873276-151875095 | 208594 | 114.61 |
| 7:151876919-151877211 | 73552  | 251.03 |
| 7:151877796-151879679 | 273602 | 145.22 |
| 7:151880059-151880241 | 60676  | 331.56 |
| 7:151882643-151882716 | 12305  | 166.28 |
| 7:151884347-151884561 | 36501  | 169.77 |
| 7:151884800-151884932 | 15481  | 116.4  |

© 2015 American Medical Association. All rights reserved.

|                       |        |         |
|-----------------------|--------|---------|
| 7:151891094-151891213 | 25334  | 211.12  |
| 7:151891314-151891346 | 578    | 17.52   |
| 7:151891525-151891653 | 18291  | 141.79  |
| 7:151892992-151893096 | 12157  | 115.78  |
| 7:151896364-151896544 | 9847   | 54.4    |
| 7:151900019-151900149 | 7569   | 57.78   |
| 7:151902191-151902310 | 6500   | 54.17   |
| 7:151904385-151904513 | 9872   | 76.53   |
| 7:151917608-151917820 | 27052  | 127     |
| 7:151919086-151919151 | 8824   | 133.7   |
| 7:151919658-151919767 | 5232   | 47.56   |
| 7:151921100-151921264 | 26042  | 157.83  |
| 7:151921520-151921701 | 20079  | 110.32  |
| 7:151927008-151927112 | 157200 | 1497.14 |
| 7:151927305-151927406 | 8376   | 82.12   |
| 7:151932902-151933018 | 25106  | 214.58  |
| 7:151935792-151935911 | 12599  | 104.99  |
| 7:151944987-151945705 | 274924 | 382.37  |
| 7:151946961-151947038 | 9943   | 127.47  |
| 7:151947938-151948051 | 16019  | 140.52  |
| 7:151949024-151949175 | 11496  | 75.63   |
| 7:151949631-151949800 | 14574  | 85.73   |
| 7:151960101-151960215 | 24360  | 211.83  |
| 7:151962123-151962294 | 177061 | 1029.42 |
| 7:151970790-151970952 | 40160  | 246.38  |
| 7:152007051-152007160 | 11807  | 107.34  |
| 7:152008883-152009031 | 23779  | 159.59  |
| 7:152012223-152012423 | 22780  | 113.33  |
| 7:152027686-152027827 | 17826  | 125.54  |
| 7:152055672-152055760 | 17698  | 198.85  |
| 7:152132711-152132871 | 530    | 3.29    |
| 8:11565822-11566437   | 447    | 0.73    |
| 8:11606425-11606594   | 21710  | 127.71  |
| 8:11607620-11607745   | 5344   | 42.41   |
| 8:11612555-11612642   | 1956   | 22.23   |
| 8:11614444-11614592   | 12026  | 80.71   |
| 8:11615802-11615984   | 18759  | 102.51  |
| 8:12943320-12943440   | 8604   | 71.11   |
| 8:12943799-12943972   | 18207  | 104.64  |
| 8:12945996-12946213   | 18042  | 82.76   |
| 8:12947761-12947979   | 16781  | 76.63   |

© 2015 American Medical Association. All rights reserved.

|                     |        |        |
|---------------------|--------|--------|
| 8:12948827-12948941 | 8042   | 69.93  |
| 8:12950121-12950334 | 7430   | 34.72  |
| 8:12952268-12952466 | 11669  | 58.64  |
| 8:12952595-12952754 | 11326  | 70.79  |
| 8:12955908-12956084 | 22241  | 125.66 |
| 8:12956856-12958279 | 89215  | 62.65  |
| 8:12960299-12960362 | 6313   | 98.64  |
| 8:12968251-12968332 | 16237  | 198.01 |
| 8:12973095-12973166 | 4614   | 64.08  |
| 8:12990453-12990489 | 355    | 9.59   |
| 8:13072135-13072283 | 21847  | 146.62 |
| 8:13133771-13133909 | 0      | 0      |
| 8:13162734-13162811 | 6292   | 80.67  |
| 8:13251062-13251202 | 24379  | 172.9  |
| 8:13258979-13259128 | 13460  | 89.73  |
| 8:13356558-13357580 | 202074 | 197.53 |
| 8:27255087-27255306 | 25487  | 115.85 |
| 8:27277412-27277590 | 12981  | 72.52  |
| 8:27278174-27278261 | 7497   | 85.19  |
| 8:27279821-27279902 | 4067   | 49.6   |
| 8:27287610-27287672 | 22092  | 350.67 |
| 8:27287881-27287935 | 4531   | 82.38  |
| 8:27288393-27288533 | 17823  | 126.4  |
| 8:27288867-27288989 | 6421   | 52.2   |
| 8:27289777-27289878 | 4550   | 44.61  |
| 8:27290952-27291069 | 5315   | 45.04  |
| 8:27291610-27291649 | 5571   | 139.28 |
| 8:27292030-27292076 | 439    | 9.34   |
| 8:27293260-27293310 | 3291   | 64.53  |
| 8:27293768-27293865 | 18017  | 183.85 |
| 8:27294639-27294723 | 7294   | 85.81  |
| 8:27294913-27295013 | 9241   | 91.5   |
| 8:27295282-27295397 | 3831   | 33.03  |
| 8:27296548-27296648 | 5223   | 51.71  |
| 8:27296826-27296915 | 11537  | 128.19 |
| 8:27297754-27297958 | 14715  | 71.78  |
| 8:27300392-27300500 | 4523   | 41.5   |
| 8:27301723-27301788 | 5439   | 82.41  |
| 8:27303311-27303436 | 17742  | 140.81 |
| 8:27308266-27308412 | 5696   | 38.75  |
| 8:27308560-27308595 | 1867   | 51.86  |

© 2015 American Medical Association. All rights reserved.

|                     |       |        |
|---------------------|-------|--------|
| 8:27309002-27309157 | 2927  | 18.76  |
| 8:27310631-27310677 | 2970  | 63.19  |
| 8:27311671-27311808 | 8774  | 63.58  |
| 8:27312048-27312128 | 4077  | 50.33  |
| 8:27315811-27316026 | 4448  | 20.59  |
| 8:30915964-30916059 | 4570  | 47.6   |
| 8:30916669-30916781 | 25448 | 225.2  |
| 8:30921805-30921950 | 31947 | 218.82 |
| 8:30922431-30922579 | 10829 | 72.68  |
| 8:30924549-30924698 | 10628 | 70.85  |
| 8:30925774-30925843 | 1129  | 16.13  |
| 8:30933689-30933803 | 15969 | 138.86 |
| 8:30938383-30938812 | 34354 | 79.89  |
| 8:30941215-30941295 | 8280  | 102.22 |
| 8:30942682-30942762 | 9991  | 123.35 |
| 8:30945292-30945436 | 8961  | 61.8   |
| 8:30946406-30946481 | 2604  | 34.26  |
| 8:30947981-30948048 | 10111 | 148.69 |
| 8:30948350-30948458 | 20434 | 187.47 |
| 8:30949346-30949414 | 10256 | 148.64 |
| 8:30954284-30954366 | 7764  | 93.54  |
| 8:30958365-30958471 | 5194  | 48.54  |
| 8:30969131-30969315 | 19361 | 104.65 |
| 8:30973870-30974044 | 22080 | 126.17 |
| 8:30977759-30977940 | 34426 | 189.15 |
| 8:30982038-30982139 | 6412  | 62.86  |
| 8:30982424-30982516 | 8525  | 91.67  |
| 8:30989881-30990022 | 6782  | 47.76  |
| 8:30998946-30999116 | 15383 | 89.96  |
| 8:30999197-30999291 | 4935  | 51.95  |
| 8:31000142-31000217 | 7827  | 102.99 |
| 8:31001066-31001139 | 4226  | 57.11  |
| 8:31004569-31004644 | 4388  | 57.74  |
| 8:31004880-31004992 | 8871  | 78.5   |
| 8:31007857-31007971 | 15468 | 134.5  |
| 8:31012140-31012271 | 6450  | 48.86  |
| 8:31014884-31015046 | 12307 | 75.5   |
| 8:31024538-31024746 | 16648 | 79.66  |
| 8:31030511-31030618 | 8439  | 78.14  |
| 8:38271146-38271322 | 3323  | 18.77  |
| 8:38271436-38271552 | 3650  | 31.2   |

© 2015 American Medical Association. All rights reserved.

|                     |        |        |
|---------------------|--------|--------|
| 8:38271670-38271807 | 6836   | 49.54  |
| 8:38272077-38272147 | 6902   | 97.21  |
| 8:38272297-38272419 | 13249  | 107.72 |
| 8:38273363-38273578 | 4365   | 20.21  |
| 8:38274824-38274934 | 10706  | 96.45  |
| 8:38275388-38275509 | 12697  | 104.07 |
| 8:38275746-38275891 | 6968   | 47.73  |
| 8:38277051-38277253 | 13206  | 65.05  |
| 8:38279315-38279459 | 11089  | 76.48  |
| 8:38280543-38280693 | 5240   | 34.7   |
| 8:38282027-38282217 | 25590  | 133.98 |
| 8:38283640-38283763 | 32710  | 263.79 |
| 8:38285439-38285611 | 14905  | 86.16  |
| 8:38285864-38285962 | 3150   | 31.82  |
| 8:38286814-38286908 | 1043   | 10.98  |
| 8:38287200-38287466 | 5512   | 20.64  |
| 8:38297824-38297890 | 647    | 9.66   |
| 8:38314874-38315052 | 5888   | 32.89  |
| 8:38318614-38318624 | 0      | 0      |
| 8:41789723-41792385 | 272004 | 102.14 |
| 8:41794774-41795086 | 23567  | 75.29  |
| 8:41798360-41798962 | 53919  | 89.42  |
| 8:41800299-41800518 | 28359  | 128.9  |
| 8:41801266-41801497 | 26174  | 112.82 |
| 8:41804109-41804202 | 7228   | 76.89  |
| 8:41805269-41805430 | 8147   | 50.29  |
| 8:41806740-41806881 | 1762   | 12.41  |
| 8:41812814-41812929 | 11923  | 102.78 |
| 8:41814567-41814788 | 25008  | 112.65 |
| 8:41832222-41832340 | 11728  | 98.55  |
| 8:41834526-41834845 | 41252  | 128.91 |
| 8:41836160-41836295 | 25276  | 185.85 |
| 8:41838364-41838445 | 22843  | 278.57 |
| 8:41839357-41839472 | 7765   | 66.94  |
| 8:41844973-41845081 | 31079  | 285.13 |
| 8:41905896-41906495 | 77831  | 129.72 |
| 8:67705972-67706067 | 2992   | 31.17  |
| 8:67710777-67710860 | 20421  | 243.11 |
| 8:67716610-67716682 | 6879   | 94.23  |
| 8:67726088-67726163 | 4880   | 64.21  |
| 8:67734607-67734694 | 20585  | 233.92 |

© 2015 American Medical Association. All rights reserved.

|                     |       |        |
|---------------------|-------|--------|
| 8:67740889-67740938 | 15503 | 310.06 |
| 8:67743489-67743548 | 10502 | 175.03 |
| 8:67747998-67748081 | 5490  | 65.36  |
| 8:67748178-67748309 | 17519 | 132.72 |
| 8:67752238-67752350 | 13405 | 118.63 |
| 8:67752446-67752482 | 2185  | 59.05  |
| 8:67753259-67753345 | 8818  | 101.36 |
| 8:67755687-67755782 | 11800 | 122.92 |
| 8:67759428-67759583 | 12017 | 77.03  |
| 8:67763066-67763155 | 3446  | 38.29  |
| 8:67771646-67771816 | 27901 | 163.16 |
| 8:68864630-68864770 | 2053  | 14.56  |
| 8:68930081-68930152 | 5236  | 72.72  |
| 8:68931784-68931906 | 4301  | 34.97  |
| 8:68934271-68934375 | 10021 | 95.44  |
| 8:68939457-68939558 | 17186 | 168.49 |
| 8:68942732-68942893 | 21047 | 129.92 |
| 8:68950394-68950527 | 12293 | 91.74  |
| 8:68956722-68956825 | 21151 | 203.38 |
| 8:68965332-68965481 | 22318 | 148.79 |
| 8:68968065-68968209 | 13579 | 93.65  |
| 8:68972914-68973014 | 16231 | 160.7  |
| 8:68981268-68981371 | 8993  | 86.47  |
| 8:68982070-68982119 | 6119  | 122.38 |
| 8:68984730-68984805 | 9182  | 120.82 |
| 8:68989632-68989704 | 12823 | 175.66 |
| 8:68992678-68992820 | 6455  | 45.14  |
| 8:68992981-68993073 | 9625  | 103.49 |
| 8:68995475-68995623 | 13177 | 88.44  |
| 8:68999959-69000044 | 26410 | 307.09 |
| 8:69002814-69002950 | 21390 | 156.13 |
| 8:69005840-69005957 | 14658 | 124.22 |
| 8:69009252-69009436 | 32987 | 178.31 |
| 8:69011917-69012119 | 27211 | 134.04 |
| 8:69012178-69012219 | 603   | 14.36  |
| 8:69012266-69012274 | 439   | 48.78  |
| 8:69012370-69012385 | 182   | 11.38  |
| 8:69012411-69012461 | 250   | 4.9    |
| 8:69013628-69013660 | 4247  | 128.7  |
| 8:69020338-69020566 | 13188 | 57.59  |
| 8:69021651-69021858 | 25013 | 120.25 |

© 2015 American Medical Association. All rights reserved.

|                     |       |        |
|---------------------|-------|--------|
| 8:69027988-69028167 | 31236 | 173.53 |
| 8:69030779-69030879 | 20405 | 202.03 |
| 8:69031067-69031069 | 327   | 109    |
| 8:69031667-69031749 | 16343 | 196.9  |
| 8:69032431-69032521 | 12363 | 135.86 |
| 8:69033156-69033284 | 8989  | 69.68  |
| 8:69039613-69039654 | 4799  | 114.26 |
| 8:69046294-69046511 | 23709 | 108.76 |
| 8:69050650-69050752 | 10015 | 97.23  |
| 8:69058444-69058587 | 9171  | 63.69  |
| 8:69069557-69069671 | 11009 | 95.73  |
| 8:69103957-69104023 | 7882  | 117.64 |
| 8:69104570-69104760 | 11185 | 58.56  |
| 8:69129851-69129953 | 8770  | 85.15  |
| 8:69136794-69136861 | 6955  | 102.28 |
| 8:69143568-69143613 | 1039  | 22.59  |
| 8:90947810-90947840 | 2295  | 74.03  |
| 8:90948315-90948351 | 0     | 0      |
| 8:90949254-90949303 | 3996  | 79.92  |
| 8:90955481-90955594 | 25884 | 227.05 |
| 8:90958368-90958523 | 19488 | 124.92 |
| 8:90960052-90960120 | 1727  | 25.03  |
| 8:90965472-90965919 | 60954 | 136.06 |
| 8:90967511-90967783 | 24055 | 88.11  |
| 8:90970953-90971082 | 18655 | 143.5  |
| 8:90976638-90976735 | 21586 | 220.27 |
| 8:90982592-90982785 | 29085 | 149.92 |
| 8:90983401-90983518 | 8033  | 68.08  |
| 8:90990448-90990551 | 12134 | 116.67 |
| 8:90992962-90993121 | 23039 | 143.99 |
| 8:90993603-90993751 | 17593 | 118.07 |
| 8:90994225-90994230 | 0     | 0      |
| 8:90994950-90995083 | 26629 | 198.72 |
| 8:90996753-90996789 | 1201  | 32.46  |
| 8:92972470-92972745 | 12416 | 44.99  |
| 8:92982886-92983076 | 16917 | 88.57  |
| 8:92988133-92988201 | 18224 | 264.12 |
| 8:92992155-92992159 | 0     | 0      |
| 8:92998352-92998553 | 35737 | 176.92 |
| 8:92999115-92999200 | 20743 | 241.2  |
| 8:93003867-93004117 | 34988 | 139.39 |

© 2015 American Medical Association. All rights reserved.

|                       |       |        |
|-----------------------|-------|--------|
| 8:93006819-93006851   | 0     | 0      |
| 8:93015558-93015608   | 0     | 0      |
| 8:93017340-93017525   | 22836 | 122.77 |
| 8:93023230-93023319   | 13533 | 150.37 |
| 8:93026807-93027048   | 23659 | 97.76  |
| 8:93029454-93029591   | 17978 | 130.28 |
| 8:93029637-93029659   | 776   | 33.74  |
| 8:93074774-93074780   | 1874  | 267.71 |
| 8:93074819-93074937   | 7849  | 65.96  |
| 8:93088193-93088280   | 12995 | 147.67 |
| 8:93107575-93107695   | 57    | 0.47   |
| 8:118811951-118812136 | 16450 | 88.44  |
| 8:118816961-118817132 | 29526 | 171.66 |
| 8:118819456-118819616 | 24184 | 150.21 |
| 8:118825111-118825200 | 3357  | 37.3   |
| 8:118830674-118830769 | 17409 | 181.34 |
| 8:118831915-118832033 | 16962 | 142.54 |
| 8:118834704-118834836 | 18602 | 139.86 |
| 8:118842469-118842588 | 7332  | 61.1   |
| 8:118843838-118843892 | 0     | 0      |
| 8:118847683-118847790 | 10305 | 95.42  |
| 8:118849347-118849440 | 12994 | 138.23 |
| 8:119122324-119123285 | 81238 | 84.45  |
| 8:128748840-128748869 | 725   | 24.17  |
| 8:128750494-128751265 | 36924 | 47.83  |
| 8:128752642-128753204 | 42821 | 76.06  |
| 9:5021988-5022213     | 25280 | 111.86 |
| 9:5029783-5029906     | 20093 | 162.04 |
| 9:5044403-5044520     | 4793  | 40.62  |
| 9:5050686-5050831     | 17225 | 117.98 |
| 9:5054563-5054884     | 30179 | 93.72  |
| 9:5055669-5055788     | 4343  | 36.19  |
| 9:5064883-5065040     | 10647 | 67.39  |
| 9:5066678-5066789     | 6341  | 56.62  |
| 9:5069022-5069208     | 13475 | 72.06  |
| 9:5069925-5070052     | 5452  | 42.59  |
| 9:5072492-5072626     | 5840  | 43.26  |
| 9:5073698-5073785     | 11347 | 128.94 |
| 9:5077453-5077580     | 3903  | 30.49  |
| 9:5078306-5078444     | 32209 | 231.72 |
| 9:5080229-5080380     | 39721 | 261.32 |

© 2015 American Medical Association. All rights reserved.



|                   |        |        |
|-------------------|--------|--------|
| 9:5080533-5080683 | 26690  | 176.75 |
| 9:5081725-5081861 | 11661  | 85.12  |
| 9:5089674-5089863 | 19309  | 101.63 |
| 9:5090446-5090570 | 10007  | 80.06  |
| 9:5090739-5090911 | 22422  | 129.61 |
| 9:5123004-5123121 | 9132   | 77.39  |
| 9:5126333-5126446 | 10798  | 94.72  |
| 9:5126684-5126791 | 10350  | 95.83  |
| 9:8317874-8317942 | 12686  | 183.86 |
| 9:8319831-8319966 | 12726  | 93.57  |
| 9:8331582-8331736 | 17302  | 111.63 |
| 9:8338922-8339047 | 17406  | 138.14 |
| 9:8340343-8340469 | 7440   | 58.58  |
| 9:8341090-8341268 | 30807  | 172.11 |
| 9:8341693-8341978 | 42165  | 147.43 |
| 9:8375936-8376090 | 14034  | 90.54  |
| 9:8376607-8376726 | 12282  | 102.35 |
| 9:8389232-8389407 | 30681  | 174.32 |
| 9:8404537-8404660 | 9007   | 72.64  |
| 9:8436592-8436689 | 9752   | 99.51  |
| 9:8437198-8437239 | 97     | 2.31   |
| 9:8449725-8449845 | 17783  | 146.97 |
| 9:8454580-8454594 | 415    | 27.67  |
| 9:8460277-8460280 | 73     | 18.25  |
| 9:8460411-8460571 | 16871  | 104.79 |
| 9:8465466-8465675 | 38868  | 185.09 |
| 9:8470995-8471085 | 15030  | 165.16 |
| 9:8484119-8484378 | 29781  | 114.54 |
| 9:8485227-8485324 | 6606   | 67.41  |
| 9:8485762-8486349 | 56658  | 96.36  |
| 9:8486456-8486459 | 136    | 34     |
| 9:8492862-8492979 | 23685  | 200.72 |
| 9:8497242-8497268 | 1366   | 50.59  |
| 9:8499647-8499840 | 35049  | 180.66 |
| 9:8500754-8501059 | 62905  | 205.57 |
| 9:8504261-8504405 | 30567  | 210.81 |
| 9:8507301-8507434 | 25098  | 187.3  |
| 9:8517848-8518429 | 105147 | 180.66 |
| 9:8521277-8521546 | 47526  | 176.02 |
| 9:8523513-8523524 | 679    | 56.58  |
| 9:8524779-8524790 | 209    | 17.42  |

© 2015 American Medical Association. All rights reserved.

|                     |       |        |
|---------------------|-------|--------|
| 9:8524925-8525046   | 30183 | 247.4  |
| 9:8525168-8525186   | 2773  | 145.95 |
| 9:8526627-8526644   | 2014  | 111.89 |
| 9:8527345-8527353   | 784   | 87.11  |
| 9:8528425-8528492   | 134   | 1.97   |
| 9:8528581-8528779   | 37966 | 190.78 |
| 9:8633317-8633458   | 19983 | 140.73 |
| 9:8636699-8636844   | 14596 | 99.97  |
| 9:8733780-8733843   | 332   | 5.19   |
| 9:21968228-21968241 | 406   | 29     |
| 9:21968724-21968770 | 0     | 0      |
| 9:21970901-21971207 | 11535 | 37.57  |
| 9:21974476-21974826 | 55265 | 157.45 |
| 9:21994138-21994453 | 6946  | 21.98  |
| 9:22005986-22006246 | 6472  | 24.8   |
| 9:22008716-22008952 | 5005  | 21.12  |
| 9:35074105-35074213 | 7080  | 64.95  |
| 9:35074368-35074491 | 18374 | 148.18 |
| 9:35074924-35075079 | 12424 | 79.64  |
| 9:35075276-35075322 | 4413  | 93.89  |
| 9:35075462-35075751 | 31927 | 110.09 |
| 9:35075959-35076025 | 10965 | 163.66 |
| 9:35076429-35076580 | 8823  | 58.05  |
| 9:35076721-35076867 | 10876 | 73.99  |
| 9:35076968-35077098 | 7200  | 54.96  |
| 9:35077261-35077396 | 11091 | 81.55  |
| 9:35078138-35078340 | 8784  | 43.27  |
| 9:35078602-35078733 | 6931  | 52.51  |
| 9:35079148-35079238 | 1239  | 13.62  |
| 9:35079438-35079521 | 7854  | 93.5   |
| 9:36840526-36840633 | 184   | 1.7    |
| 9:36846840-36846926 | 1713  | 19.69  |
| 9:36882001-36882102 | 2884  | 28.27  |
| 9:36923352-36923481 | 10488 | 80.68  |
| 9:36930885-36930941 | 0     | 0      |
| 9:36966546-36966721 | 9290  | 52.78  |
| 9:37002645-37002773 | 1210  | 9.38   |
| 9:37006470-37006534 | 7773  | 119.58 |
| 9:37014994-37015191 | 42213 | 213.2  |
| 9:37020633-37020798 | 22853 | 137.67 |
| 9:37033983-37034028 | 1011  | 21.98  |

© 2015 American Medical Association. All rights reserved.

|                     |       |        |
|---------------------|-------|--------|
| 9:80336239-80336429 | 21310 | 111.57 |
| 9:80343430-80343583 | 31313 | 203.33 |
| 9:80409379-80409508 | 17902 | 137.71 |
| 9:80412436-80412564 | 16609 | 128.75 |
| 9:80430532-80430686 | 9235  | 59.58  |
| 9:80537077-80537261 | 30560 | 165.19 |
| 9:80645431-80645479 | 0     | 0      |
| 9:80646016-80646151 | 3849  | 28.3   |
| 9:87285664-87285875 | 17998 | 84.9   |
| 9:87317074-87317148 | 5888  | 78.51  |
| 9:87317263-87317334 | 12318 | 171.08 |
| 9:87322759-87322827 | 14561 | 211.03 |
| 9:87325552-87325706 | 17833 | 115.05 |
| 9:87338488-87338624 | 20580 | 150.22 |
| 9:87339139-87339271 | 32006 | 240.65 |
| 9:87342569-87342874 | 40483 | 132.3  |
| 9:87356807-87356842 | 1005  | 27.92  |
| 9:87359888-87359988 | 17589 | 174.15 |
| 9:87366901-87367000 | 10868 | 108.68 |
| 9:87425457-87425494 | 1196  | 31.47  |
| 9:87475955-87476002 | 1992  | 41.5   |
| 9:87482158-87482346 | 41853 | 221.44 |
| 9:87486704-87486732 | 7286  | 251.24 |
| 9:87549077-87549207 | 9969  | 76.1   |
| 9:87563377-87563549 | 8493  | 49.09  |
| 9:87570198-87570432 | 7798  | 33.18  |
| 9:87635121-87635279 | 22345 | 140.53 |
| 9:87636167-87636352 | 16272 | 87.48  |
| 9:93606181-93606597 | 10640 | 25.52  |
| 9:93607716-93607876 | 8408  | 52.22  |
| 9:93624488-93624626 | 5344  | 38.45  |
| 9:93626871-93626949 | 8672  | 109.77 |
| 9:93627330-93627379 | 5055  | 101.1  |
| 9:93629413-93629481 | 10691 | 154.94 |
| 9:93636486-93636573 | 8937  | 101.56 |
| 9:93636954-93637131 | 23861 | 134.05 |
| 9:93639853-93640062 | 20897 | 99.51  |
| 9:93641046-93641235 | 33324 | 175.39 |
| 9:93650031-93650171 | 28896 | 204.94 |
| 9:93650797-93650909 | 3325  | 29.42  |
| 9:93657810-93657882 | 11216 | 153.64 |

© 2015 American Medical Association. All rights reserved.

|                     |       |        |
|---------------------|-------|--------|
| 9:97863989-97864132 | 5183  | 35.99  |
| 9:97869348-97869551 | 7648  | 37.49  |
| 9:97873745-97873919 | 13876 | 79.29  |
| 9:97876911-97876992 | 11930 | 145.49 |
| 9:97879597-97879672 | 3016  | 39.68  |
| 9:97887368-97887467 | 7054  | 70.54  |
| 9:97888811-97888863 | 2896  | 54.64  |
| 9:97897628-97897784 | 8703  | 55.43  |
| 9:97912205-97912369 | 3902  | 23.65  |
| 9:97933361-97933425 | 5880  | 90.46  |
| 9:97934319-97934429 | 5919  | 53.32  |
| 9:98002931-98003025 | 4422  | 46.55  |
| 9:98009714-98009798 | 7767  | 91.38  |
| 9:98011409-98011573 | 13533 | 82.02  |
| 9:98208665-98208673 | 157   | 17.44  |
| 9:98209193-98209733 | 34988 | 64.67  |
| 9:98211351-98211605 | 2164  | 8.49   |
| 9:98212123-98212222 | 4874  | 48.74  |
| 9:98215760-98215902 | 12878 | 90.06  |
| 9:98218558-98218695 | 10573 | 76.62  |
| 9:98220295-98220575 | 14637 | 52.09  |
| 9:98221882-98222065 | 11989 | 65.16  |
| 9:98224138-98224280 | 15406 | 107.73 |
| 9:98229398-98229707 | 41504 | 133.88 |
| 9:98231033-98231435 | 43599 | 108.19 |
| 9:98232095-98232213 | 9317  | 78.29  |
| 9:98236294-98236425 | 1821  | 13.8   |
| 9:98238316-98238441 | 2603  | 20.66  |
| 9:98239041-98239139 | 2552  | 25.78  |
| 9:98239829-98239984 | 8146  | 52.22  |
| 9:98240337-98240468 | 9872  | 74.79  |
| 9:98241282-98241429 | 16716 | 112.95 |
| 9:98242251-98242372 | 18051 | 147.96 |
| 9:98242672-98242870 | 22932 | 115.24 |
| 9:98244227-98244322 | 5662  | 58.98  |
| 9:98244416-98244520 | 4335  | 41.29  |
| 9:98247967-98248156 | 19851 | 104.48 |
| 9:98268689-98268881 | 4790  | 24.82  |
| 9:98270443-98270643 | 3136  | 15.6   |
| 9:98278751-98278753 | 3     | 1      |
| 9:98278905-98279102 | 6934  | 35.02  |

|                       |       |        |
|-----------------------|-------|--------|
| 9:100437721-100437869 | 12688 | 85.15  |
| 9:100444591-100444712 | 12135 | 99.47  |
| 9:100447205-100447322 | 4571  | 38.74  |
| 9:100449378-100449543 | 11213 | 67.55  |
| 9:100451816-100451921 | 3806  | 35.91  |
| 9:100455931-100456041 | 6630  | 59.73  |
| 9:100459403-100459574 | 2397  | 13.94  |
| 9:133589707-133589842 | 5791  | 42.58  |
| 9:133709420-133709431 | 0     | 0      |
| 9:133710261-133710269 | 0     | 0      |
| 9:133710700-133710732 | 0     | 0      |
| 9:133710744-133710782 | 0     | 0      |
| 9:133710788-133710817 | 7     | 0.23   |
| 9:133710819-133710912 | 640   | 6.81   |
| 9:133729451-133729624 | 23712 | 136.28 |
| 9:133730188-133730483 | 25428 | 85.91  |
| 9:133738150-133738422 | 25357 | 92.88  |
| 9:133747516-133747600 | 2731  | 32.13  |
| 9:133748247-133748424 | 12138 | 68.19  |
| 9:133750255-133750439 | 16990 | 91.84  |
| 9:133753802-133753954 | 19583 | 127.99 |
| 9:133755455-133755544 | 12787 | 142.08 |
| 9:133755887-133756051 | 3635  | 22.03  |
| 9:133759356-133761070 | 53947 | 31.46  |
| 9:135771622-135772141 | 48230 | 92.75  |
| 9:135772571-135772732 | 13692 | 84.52  |
| 9:135772810-135772997 | 17122 | 91.07  |
| 9:135776102-135776224 | 15695 | 127.6  |
| 9:135776976-135777086 | 23566 | 212.31 |
| 9:135777992-135778174 | 34157 | 186.65 |
| 9:135779038-135779204 | 9179  | 54.96  |
| 9:135779798-135779841 | 1988  | 45.18  |
| 9:135780968-135781526 | 32038 | 57.31  |
| 9:135782118-135782222 | 3218  | 30.65  |
| 9:135782688-135782757 | 7693  | 109.9  |
| 9:135785958-135786079 | 27440 | 224.92 |
| 9:135786389-135786500 | 12197 | 108.9  |
| 9:135786768-135786955 | 26863 | 142.89 |
| 9:135787669-135787844 | 11927 | 67.77  |
| 9:135796750-135796823 | 7514  | 101.54 |
| 9:135797206-135797360 | 15447 | 99.66  |

© 2015 American Medical Association. All rights reserved.

|                       |       |        |
|-----------------------|-------|--------|
| 9:135798735-135798879 | 8419  | 58.06  |
| 9:135800974-135801126 | 14004 | 91.53  |
| 9:135802588-135802691 | 6727  | 64.68  |
| 9:135804154-135804259 | 13926 | 131.38 |
| 9:139390523-139392010 | 48104 | 32.33  |
| 9:139393351-139393448 | 17981 | 183.48 |
| 9:139393564-139393711 | 5780  | 39.05  |
| 9:139395004-139395299 | 18976 | 64.11  |
| 9:139396200-139396365 | 3249  | 19.57  |
| 9:139396453-139396540 | 4357  | 49.51  |
| 9:139396724-139396940 | 1414  | 6.52   |
| 9:139397634-139397782 | 6421  | 43.09  |
| 9:139399125-139399556 | 3644  | 8.44   |
| 9:139399762-139400333 | 7127  | 12.46  |
| 9:139400979-139401091 | 765   | 6.77   |
| 9:139401168-139401425 | 2477  | 9.6    |
| 9:139401757-139401889 | 1811  | 13.62  |
| 9:139402407-139402591 | 7134  | 38.56  |
| 9:139402684-139402837 | 16739 | 108.69 |
| 9:139403322-139403523 | 562   | 2.78   |
| 9:139404185-139404413 | 20362 | 88.92  |
| 9:139405105-139405257 | 2837  | 18.54  |
| 9:139405604-139405723 | 4777  | 39.81  |
| 9:139407473-139407586 | 5578  | 48.93  |
| 9:139407844-139407989 | 5576  | 38.19  |
| 9:139408962-139409154 | 3110  | 16.11  |
| 9:139409742-139409852 | 7226  | 65.1   |
| 9:139409935-139410168 | 2758  | 11.79  |
| 9:139410433-139410546 | 6248  | 54.81  |
| 9:139411724-139411837 | 2138  | 18.75  |
| 9:139412204-139412389 | 8783  | 47.22  |
| 9:139412589-139412744 | 2051  | 13.15  |
| 9:139413043-139413276 | 7919  | 33.84  |
| 9:139413895-139414017 | 9591  | 77.98  |
| 9:139417302-139417640 | 1772  | 5.23   |
| 9:139418169-139418431 | 2549  | 9.69   |
| 9:139438476-139438554 | 230   | 2.91   |
| 9:139440178-139440238 | 0     | 0      |
| 10:3821731-3821782    | 3304  | 63.54  |
| 10:3822298-3822421    | 13710 | 110.56 |
| 10:3823663-3824406    | 79357 | 106.66 |

© 2015 American Medical Association. All rights reserved.

|                      |       |        |
|----------------------|-------|--------|
| 10:3827105-3827206   | 6321  | 61.97  |
| 10:8097619-8097859   | 2206  | 9.15   |
| 10:8100268-8100804   | 39194 | 72.99  |
| 10:8105956-8106101   | 14220 | 97.4   |
| 10:8111436-8111563   | 15716 | 122.78 |
| 10:8115702-8115986   | 34226 | 120.09 |
| 10:12391818-12391909 | 1864  | 20.26  |
| 10:12595224-12595355 | 6168  | 46.73  |
| 10:12708735-12708809 | 11045 | 147.27 |
| 10:12802947-12803085 | 11275 | 81.12  |
| 10:12811672-12811798 | 14569 | 114.72 |
| 10:12833157-12833232 | 8744  | 115.05 |
| 10:12856194-12856306 | 8144  | 72.07  |
| 10:12858249-12858327 | 3436  | 43.49  |
| 10:12866464-12866551 | 4053  | 46.06  |
| 10:12867572-12867724 | 16793 | 109.76 |
| 10:12870768-12870886 | 4474  | 37.6   |
| 10:30727868-30728266 | 30143 | 75.55  |
| 10:30736711-30736878 | 20113 | 119.72 |
| 10:30739187-30739492 | 34174 | 111.68 |
| 10:30740567-30740673 | 11923 | 111.43 |
| 10:30747013-30747165 | 11242 | 73.48  |
| 10:30748184-30748430 | 11012 | 44.58  |
| 10:30749635-30749765 | 12220 | 93.28  |
| 10:43572707-43572779 | 44    | 0.6    |
| 10:43595907-43596170 | 8224  | 31.15  |
| 10:43597790-43598077 | 13754 | 47.76  |
| 10:43600400-43600641 | 4791  | 19.8   |
| 10:43601824-43602019 | 3084  | 15.73  |
| 10:43604479-43604678 | 7697  | 38.49  |
| 10:43606655-43606913 | 18119 | 69.96  |
| 10:43607547-43607672 | 1428  | 11.33  |
| 10:43608301-43608411 | 6211  | 55.95  |
| 10:43609004-43609123 | 1526  | 12.72  |
| 10:43609928-43610184 | 17223 | 67.02  |
| 10:43612032-43612179 | 18407 | 124.37 |
| 10:43613821-43613928 | 5618  | 52.02  |
| 10:43614979-43615193 | 9662  | 44.94  |
| 10:43615529-43615651 | 2755  | 22.4   |
| 10:43617394-43617464 | 14677 | 206.72 |
| 10:43619119-43619256 | 12091 | 87.62  |

© 2015 American Medical Association. All rights reserved.

|                      |        |        |
|----------------------|--------|--------|
| 10:43620331-43620430 | 9241   | 92.41  |
| 10:43622023-43622202 | 24293  | 134.96 |
| 10:43623560-43623717 | 26724  | 169.14 |
| 10:50666861-50667280 | 58971  | 140.41 |
| 10:50668419-50668497 | 6711   | 84.95  |
| 10:50669398-50669602 | 11412  | 55.67  |
| 10:50678228-50678935 | 127116 | 179.54 |
| 10:50679021-50679166 | 17103  | 117.14 |
| 10:50680422-50680516 | 20579  | 216.62 |
| 10:50680955-50681074 | 9922   | 82.68  |
| 10:50681523-50681633 | 37212  | 335.24 |
| 10:50682073-50682288 | 29720  | 137.59 |
| 10:50683373-50683542 | 0      | 0      |
| 10:50684261-50684356 | 4457   | 46.43  |
| 10:50686400-50686516 | 37325  | 319.02 |
| 10:50690733-50690909 | 15187  | 85.8   |
| 10:50691392-50691562 | 34107  | 199.46 |
| 10:50696204-50696251 | 2596   | 54.08  |
| 10:50701163-50701298 | 12256  | 90.12  |
| 10:50708584-50708742 | 31172  | 196.05 |
| 10:50713930-50714058 | 8578   | 66.5   |
| 10:50738770-50738886 | 12750  | 108.97 |
| 10:72357809-72358937 | 52400  | 46.41  |
| 10:72360120-72360658 | 20403  | 37.85  |
| 10:75135853-75135975 | 3027   | 24.61  |
| 10:75138669-75138781 | 7823   | 69.23  |
| 10:75139637-75139712 | 19766  | 260.08 |
| 10:75139789-75139959 | 39249  | 229.53 |
| 10:75142933-75143103 | 15838  | 92.62  |
| 10:75143335-75143448 | 5385   | 47.24  |
| 10:75147447-75147541 | 18082  | 190.34 |
| 10:75148070-75148172 | 10156  | 98.6   |
| 10:75155802-75155867 | 1821   | 27.59  |
| 10:75156277-75156341 | 3503   | 53.89  |
| 10:75156922-75157032 | 1401   | 12.62  |
| 10:75157939-75158143 | 4387   | 21.4   |
| 10:75160561-75160614 | 5264   | 97.48  |
| 10:88635776-88635842 | 13980  | 208.66 |
| 10:88649819-88649981 | 23764  | 145.79 |
| 10:88651884-88651986 | 7361   | 71.47  |
| 10:88659551-88659647 | 15832  | 163.22 |

© 2015 American Medical Association. All rights reserved.



|                        |       |        |
|------------------------|-------|--------|
| 10:88659784-88659883   | 10967 | 109.67 |
| 10:88671997-88672141   | 10014 | 69.06  |
| 10:88676891-88677083   | 16278 | 84.34  |
| 10:88678929-88679226   | 41204 | 138.27 |
| 10:88681277-88681452   | 30253 | 171.89 |
| 10:88683133-88683263   | 34876 | 266.23 |
| 10:88683351-88683476   | 14176 | 112.51 |
| 10:89624227-89624305   | 13021 | 164.82 |
| 10:89653782-89653866   | 12617 | 148.44 |
| 10:89685270-89685314   | 911   | 20.24  |
| 10:89690803-89690846   | 4020  | 91.36  |
| 10:89692770-89693008   | 52447 | 219.44 |
| 10:89711875-89712016   | 36232 | 255.15 |
| 10:89717610-89717776   | 32051 | 191.92 |
| 10:89720651-89720875   | 26969 | 119.86 |
| 10:89725044-89725229   | 16212 | 87.16  |
| 10:101949355-101949384 | 6652  | 221.73 |
| 10:101950626-101950725 | 26211 | 262.11 |
| 10:101953055-101953188 | 20974 | 156.52 |
| 10:101953741-101953888 | 12881 | 87.03  |
| 10:101954182-101954278 | 7573  | 78.07  |
| 10:101959728-101959777 | 10515 | 210.3  |
| 10:101960428-101960537 | 8571  | 77.92  |
| 10:101961845-101961906 | 5484  | 88.45  |
| 10:101964263-101964414 | 17075 | 112.34 |
| 10:101964833-101964956 | 20553 | 165.75 |
| 10:101966987-101967089 | 7622  | 74     |
| 10:101969352-101969546 | 10875 | 55.77  |
| 10:101977752-101977887 | 10614 | 78.04  |
| 10:101978475-101978582 | 7967  | 73.77  |
| 10:101978765-101978889 | 9634  | 77.07  |
| 10:101979027-101979116 | 8731  | 97.01  |
| 10:101980345-101980433 | 5051  | 56.75  |
| 10:101981869-101981938 | 2597  | 37.1   |
| 10:101982623-101982737 | 12610 | 109.65 |
| 10:101985680-101985774 | 11215 | 118.05 |
| 10:101989185-101989289 | 1854  | 17.66  |
| 10:104263910-104264091 | 10226 | 56.19  |
| 10:104268926-104269060 | 17409 | 128.96 |
| 10:104309727-104309863 | 10782 | 78.7   |
| 10:104352339-104352481 | 17179 | 120.13 |

© 2015 American Medical Association. All rights reserved.

|                        |       |        |
|------------------------|-------|--------|
| 10:104353393-104353478 | 5971  | 69.43  |
| 10:104353750-104353822 | 10367 | 142.01 |
| 10:104356897-104357050 | 20392 | 132.42 |
| 10:104359190-104359301 | 9675  | 86.38  |
| 10:104375025-104375159 | 10794 | 79.96  |
| 10:104377047-104377335 | 11881 | 41.11  |
| 10:104378823-104378828 | 761   | 126.83 |
| 10:104386932-104387000 | 12240 | 177.39 |
| 10:104389823-104389912 | 14433 | 160.37 |
| 10:123239095-123239184 | 0     | 0      |
| 10:123239371-123239535 | 18196 | 110.28 |
| 10:123239565-123239627 | 6643  | 105.44 |
| 10:123241686-123241691 | 250   | 41.67  |
| 10:123243212-123243317 | 4254  | 40.13  |
| 10:123244909-123245046 | 14262 | 103.35 |
| 10:123246868-123246938 | 3127  | 44.04  |
| 10:123247505-123247627 | 20739 | 168.61 |
| 10:123256046-123256236 | 45889 | 240.26 |
| 10:123258009-123258119 | 12275 | 110.59 |
| 10:123260340-123260461 | 12770 | 104.67 |
| 10:123263304-123263455 | 8650  | 56.91  |
| 10:123274631-123274833 | 19605 | 96.58  |
| 10:123276833-123276977 | 10235 | 70.59  |
| 10:123277561-123277569 | 161   | 17.89  |
| 10:123278196-123278343 | 16243 | 109.75 |
| 10:123279493-123279683 | 14540 | 76.13  |
| 10:123297908-123297924 | 949   | 55.82  |
| 10:123298106-123298229 | 13110 | 105.73 |
| 10:123310804-123310973 | 17420 | 102.47 |
| 10:123324016-123324093 | 11221 | 143.86 |
| 10:123324952-123325218 | 29413 | 110.16 |
| 10:123353223-123353331 | 7911  | 72.58  |
| 11:532636-532755       | 4175  | 34.79  |
| 11:533296-533358       | 872   | 13.84  |
| 11:533453-533612       | 14764 | 92.28  |
| 11:533766-533944       | 14086 | 78.69  |
| 11:534212-534322       | 5032  | 45.33  |
| 11:2154217-2154453     | 4221  | 17.81  |
| 11:2154747-2154904     | 4311  | 27.28  |
| 11:2156597-2156759     | 6123  | 37.56  |
| 11:2161365-2161526     | 8474  | 52.31  |

© 2015 American Medical Association. All rights reserved.

|                      |        |        |
|----------------------|--------|--------|
| 11:8246163-8246268   | 2436   | 22.98  |
| 11:8248522-8248647   | 5416   | 42.98  |
| 11:8251838-8252051   | 25864  | 120.86 |
| 11:8284885-8284909   | 1494   | 59.76  |
| 11:8289974-8289995   | 0      | 0      |
| 11:22646232-22647356 | 102037 | 90.7   |
| 11:32410604-32410725 | 11923  | 97.73  |
| 11:32413518-32413610 | 25502  | 274.22 |
| 11:32414212-32414301 | 5694   | 63.27  |
| 11:32417803-32417953 | 9694   | 64.2   |
| 11:32421494-32421590 | 6172   | 63.63  |
| 11:32438036-32438086 | 20627  | 404.45 |
| 11:32439119-32439200 | 4728   | 57.66  |
| 11:32449502-32449604 | 1074   | 10.43  |
| 11:32450043-32450165 | 5677   | 46.15  |
| 11:32452076-32452085 | 184    | 18.4   |
| 11:32456246-32456891 | 4016   | 6.22   |
| 11:44117803-44117871 | 0      | 0      |
| 11:44129233-44129798 | 50596  | 89.39  |
| 11:44130744-44130833 | 8662   | 96.24  |
| 11:44135735-44135851 | 17252  | 147.45 |
| 11:44146339-44146534 | 15470  | 78.93  |
| 11:44148366-44148505 | 26919  | 192.28 |
| 11:44151595-44151688 | 9635   | 102.5  |
| 11:44165797-44165889 | 18742  | 201.53 |
| 11:44193161-44193292 | 30261  | 229.25 |
| 11:44219379-44219568 | 23830  | 125.42 |
| 11:44228343-44228509 | 35124  | 210.32 |
| 11:44253903-44254046 | 11841  | 82.23  |
| 11:44255665-44255793 | 11577  | 89.74  |
| 11:44257843-44257925 | 9884   | 119.08 |
| 11:44265699-44265837 | 19181  | 137.99 |
| 11:47236688-47236814 | 10898  | 85.81  |
| 11:47237887-47238023 | 9402   | 68.63  |
| 11:47238409-47238600 | 11511  | 59.95  |
| 11:47254365-47254510 | 15804  | 108.25 |
| 11:47256124-47256223 | 14635  | 146.35 |
| 11:47256308-47256485 | 5520   | 31.01  |
| 11:47256821-47256963 | 8421   | 58.89  |
| 11:47259388-47259552 | 17296  | 104.82 |
| 11:47259689-47259734 | 1707   | 37.11  |

© 2015 American Medical Association. All rights reserved.

|                        |       |        |
|------------------------|-------|--------|
| 11:47260351-47260400   | 2741  | 54.82  |
| 11:64571806-64572288   | 34382 | 71.18  |
| 11:64572506-64572670   | 7641  | 46.31  |
| 11:64573107-64573242   | 11993 | 88.18  |
| 11:64573704-64573840   | 19553 | 142.72 |
| 11:64574483-64574570   | 1830  | 20.8   |
| 11:64574651-64574691   | 459   | 11.2   |
| 11:64575024-64575152   | 13355 | 103.53 |
| 11:64575363-64575571   | 9416  | 45.05  |
| 11:64577122-64577581   | 14479 | 31.48  |
| 11:69456082-69456279   | 15531 | 78.44  |
| 11:69457799-69458014   | 3559  | 16.48  |
| 11:69458600-69458759   | 8512  | 53.2   |
| 11:69462762-69462910   | 14698 | 98.64  |
| 11:69465886-69466050   | 5600  | 33.94  |
| 11:94153291-94153347   | 5574  | 97.79  |
| 11:94163077-94163152   | 7134  | 93.87  |
| 11:94168998-94169065   | 15792 | 232.24 |
| 11:94170343-94170401   | 5392  | 91.39  |
| 11:94178976-94179059   | 18044 | 214.81 |
| 11:94180385-94180604   | 57648 | 262.04 |
| 11:94189442-94189504   | 3012  | 47.81  |
| 11:94192574-94192747   | 27852 | 160.07 |
| 11:94194102-94194202   | 4605  | 45.59  |
| 11:94197279-94197405   | 10393 | 81.83  |
| 11:94200979-94201059   | 6415  | 79.2   |
| 11:94203637-94203808   | 19107 | 111.09 |
| 11:94204740-94204925   | 15434 | 82.98  |
| 11:94208779-94208785   | 0     | 0      |
| 11:94209455-94209569   | 11345 | 98.65  |
| 11:94211901-94212042   | 15231 | 107.26 |
| 11:94212840-94212927   | 6983  | 79.35  |
| 11:94219090-94219250   | 14990 | 93.11  |
| 11:94223999-94224131   | 16717 | 125.69 |
| 11:94225808-94225836   | 154   | 5.31   |
| 11:94225948-94225967   | 1640  | 82     |
| 11:106558275-106558482 | 25218 | 121.24 |
| 11:106579238-106579392 | 21594 | 139.32 |
| 11:106617277-106617369 | 2438  | 26.22  |
| 11:106647165-106647308 | 9948  | 69.08  |
| 11:106680719-106681204 | 54899 | 112.96 |

© 2015 American Medical Association. All rights reserved.

|                        |       |        |
|------------------------|-------|--------|
| 11:106807376-106807438 | 0     | 0      |
| 11:106810186-106810904 | 73973 | 102.88 |
| 11:106849345-106849466 | 8732  | 71.57  |
| 11:106856796-106856857 | 8122  | 131    |
| 11:106888479-106888781 | 3624  | 11.96  |
| 11:108098352-108098423 | 14899 | 206.93 |
| 11:108098503-108098615 | 13298 | 117.68 |
| 11:108099905-108100050 | 6296  | 43.12  |
| 11:108106397-108106561 | 28866 | 174.95 |
| 11:108114680-108114845 | 6800  | 40.96  |
| 11:108115515-108115753 | 18967 | 79.36  |
| 11:108117691-108117854 | 11262 | 68.67  |
| 11:108119660-108119829 | 16095 | 94.68  |
| 11:108121428-108121799 | 60154 | 161.7  |
| 11:108122564-108122758 | 16790 | 86.1   |
| 11:108123544-108123639 | 3881  | 40.43  |
| 11:108124541-108124766 | 19378 | 85.74  |
| 11:108126942-108127067 | 13655 | 108.37 |
| 11:108128208-108128333 | 15207 | 120.69 |
| 11:108129713-108129802 | 5375  | 59.72  |
| 11:108137898-108138069 | 12077 | 70.22  |
| 11:108139137-108139336 | 31998 | 159.99 |
| 11:108141791-108141873 | 5393  | 64.98  |
| 11:108141978-108142133 | 25118 | 161.01 |
| 11:108143259-108143334 | 5301  | 69.75  |
| 11:108143449-108143579 | 19684 | 150.26 |
| 11:108150218-108150335 | 6140  | 52.03  |
| 11:108151722-108151895 | 13132 | 75.47  |
| 11:108153437-108153606 | 6597  | 38.81  |
| 11:108154954-108155200 | 16003 | 64.79  |
| 11:108158327-108158442 | 14953 | 128.91 |
| 11:108159704-108159830 | 13460 | 105.98 |
| 11:108160329-108160528 | 9793  | 48.97  |
| 11:108163346-108163520 | 44746 | 255.69 |
| 11:108164040-108164204 | 11225 | 68.03  |
| 11:108165654-108165786 | 19103 | 143.63 |
| 11:108168014-108168109 | 9579  | 99.78  |
| 11:108170441-108170612 | 24332 | 141.47 |
| 11:108172375-108172516 | 16566 | 116.66 |
| 11:108173580-108173756 | 26167 | 147.84 |
| 11:108175402-108175579 | 11764 | 66.09  |

© 2015 American Medical Association. All rights reserved.

|                        |        |        |
|------------------------|--------|--------|
| 11:108178624-108178711 | 6608   | 75.09  |
| 11:108180887-108181042 | 9784   | 62.72  |
| 11:108183138-108183225 | 10036  | 114.05 |
| 11:108186550-108186638 | 7415   | 83.31  |
| 11:108186738-108186840 | 8931   | 86.71  |
| 11:108188100-108188248 | 24828  | 166.63 |
| 11:108190681-108190785 | 12030  | 114.57 |
| 11:108192028-108192147 | 18912  | 157.6  |
| 11:108196037-108196271 | 32571  | 138.6  |
| 11:108196785-108196952 | 14926  | 88.85  |
| 11:108198372-108198485 | 10729  | 94.11  |
| 11:108199748-108199965 | 13926  | 63.88  |
| 11:108200941-108201148 | 32615  | 156.8  |
| 11:108202171-108202284 | 8281   | 72.64  |
| 11:108202606-108202764 | 15423  | 97     |
| 11:108203489-108203627 | 6406   | 46.09  |
| 11:108204613-108204695 | 20970  | 252.65 |
| 11:108205696-108205836 | 14402  | 102.14 |
| 11:108206572-108206688 | 7883   | 67.38  |
| 11:108213949-108214098 | 32023  | 213.49 |
| 11:108216470-108216635 | 34483  | 207.73 |
| 11:108218006-108218092 | 10004  | 114.99 |
| 11:108224493-108224607 | 27844  | 242.12 |
| 11:108225538-108225601 | 8396   | 131.19 |
| 11:108235809-108235945 | 9211   | 67.23  |
| 11:108236052-108236235 | 15361  | 83.48  |
| 11:111957642-111957683 | 2685   | 63.93  |
| 11:111959591-111959728 | 15643  | 113.36 |
| 11:111961803           | 0      | 0      |
| 11:111963804-111963921 | 0      | 0      |
| 11:111965529-111965694 | 12916  | 77.81  |
| 11:111978269-111978290 | 0      | 0      |
| 11:111990015           | 0      | 0      |
| 11:118307228-118307659 | 2174   | 5.03   |
| 11:118309739-118309837 | 2025   | 20.45  |
| 11:118318340-118318402 | 0      | 0      |
| 11:118339461-118339469 | 410    | 45.56  |
| 11:118339490-118339559 | 7383   | 105.47 |
| 11:118342377-118345030 | 275827 | 103.93 |
| 11:118347520-118347697 | 23300  | 130.9  |
| 11:118348682-118348917 | 55145  | 233.67 |

© 2015 American Medical Association. All rights reserved.

|                        |        |        |
|------------------------|--------|--------|
| 11:118350889-118350953 | 6777   | 104.26 |
| 11:118352430-118352807 | 23479  | 62.11  |
| 11:118353137-118353210 | 2133   | 28.82  |
| 11:118354898-118355029 | 12458  | 94.38  |
| 11:118355577-118355690 | 8301   | 72.82  |
| 11:118359329-118359475 | 18394  | 125.13 |
| 11:118360507-118360602 | 7148   | 74.46  |
| 11:118360844-118360964 | 11331  | 93.64  |
| 11:118361911-118362033 | 23108  | 187.87 |
| 11:118362459-118362643 | 14400  | 77.84  |
| 11:118363772-118363945 | 25857  | 148.6  |
| 11:118365003-118365113 | 5505   | 49.59  |
| 11:118365409-118365482 | 3744   | 50.59  |
| 11:118366415-118366608 | 36322  | 187.23 |
| 11:118366976-118367082 | 20248  | 189.23 |
| 11:118368651-118368788 | 24008  | 173.97 |
| 11:118369085-118369243 | 39135  | 246.13 |
| 11:118370018-118370135 | 18464  | 156.47 |
| 11:118370550-118370628 | 8241   | 104.32 |
| 11:118371702-118371862 | 16898  | 104.96 |
| 11:118372387-118372572 | 28137  | 151.27 |
| 11:118373113-118377361 | 504385 | 118.71 |
| 11:118378244-118378324 | 5283   | 65.22  |
| 11:118379851-118379915 | 2712   | 41.72  |
| 11:118380663-118380833 | 20126  | 117.7  |
| 11:118382666-118382740 | 5468   | 72.91  |
| 11:118390333-118390507 | 20436  | 116.78 |
| 11:118390672-118390779 | 4857   | 44.97  |
| 11:118391517-118391600 | 5703   | 67.89  |
| 11:118392003-118392132 | 15593  | 119.95 |
| 11:118392612-118392887 | 25788  | 93.43  |
| 11:119077128-119077322 | 798    | 4.09   |
| 11:119103158-119103405 | 16779  | 67.66  |
| 11:119142445-119142591 | 17125  | 116.5  |
| 11:119144578-119144734 | 12685  | 80.8   |
| 11:119145542-119145663 | 18673  | 153.06 |
| 11:119146707-119146844 | 23114  | 167.49 |
| 11:119148467-119148554 | 10859  | 123.4  |
| 11:119148876-119149007 | 16176  | 122.55 |
| 11:119149220-119149423 | 21251  | 104.17 |
| 11:119155679-119155810 | 13178  | 99.83  |

© 2015 American Medical Association. All rights reserved.

|                        |       |        |
|------------------------|-------|--------|
| 11:119155899-119156276 | 31017 | 82.06  |
| 11:119158562-119158656 | 8003  | 84.24  |
| 11:119167628-119167744 | 8651  | 73.94  |
| 11:119168094-119168191 | 13438 | 137.12 |
| 11:119169068-119169250 | 17133 | 93.62  |
| 11:119170205-119170491 | 89051 | 310.28 |
| 11:125495656-125495907 | 51    | 0.2    |
| 11:125496644-125496728 | 9827  | 115.61 |
| 11:125497502-125497725 | 19691 | 87.91  |
| 11:125499127-125499191 | 11064 | 170.22 |
| 11:125499286-125499355 | 8973  | 128.19 |
| 11:125503058-125503246 | 18773 | 99.33  |
| 11:125505324-125505428 | 15333 | 146.03 |
| 11:125507344-125507440 | 6657  | 68.63  |
| 11:125513687-125513795 | 8179  | 75.04  |
| 11:125513986-125514163 | 34081 | 191.47 |
| 11:125514407-125514538 | 17769 | 134.61 |
| 11:125523641-125523742 | 13896 | 136.24 |
| 11:125525120-125525215 | 4692  | 48.88  |
| 12:4383207-4383401     | 13726 | 70.39  |
| 12:4385171-4385386     | 17224 | 79.74  |
| 12:4387926-4388085     | 14611 | 91.32  |
| 12:4398008-4398156     | 20167 | 135.35 |
| 12:4406923-4407116     | 0     | 0      |
| 12:4409026-4409175     | 10581 | 70.54  |
| 12:11803062-11803094   | 3966  | 120.18 |
| 12:11905384-11905513   | 17891 | 137.62 |
| 12:11992074-11992238   | 11607 | 70.35  |
| 12:11993395-11993417   | 0     | 0      |
| 12:12006361-12006495   | 11429 | 84.66  |
| 12:12022358-12022903   | 99121 | 181.54 |
| 12:12037379-12037521   | 24477 | 171.17 |
| 12:12038860-12038960   | 10369 | 102.66 |
| 12:12043875-12043980   | 20164 | 190.23 |
| 12:12044475-12044535   | 0     | 0      |
| 12:12870774-12871248   | 34923 | 73.52  |
| 12:12871759-12871880   | 9580  | 78.52  |
| 12:12873999-12874141   | 4005  | 28.01  |
| 12:25362729-25362845   | 6307  | 53.91  |
| 12:25368375-25368494   | 10008 | 83.4   |
| 12:25378548-25378707   | 13754 | 85.96  |

© 2015 American Medical Association. All rights reserved.



|                      |        |        |
|----------------------|--------|--------|
| 12:25380168-25380346 | 14231  | 79.5   |
| 12:25388140-25388160 | 0      | 0      |
| 12:25398208-25398318 | 5550   | 50     |
| 12:46123620-46123711 | 1639   | 17.82  |
| 12:46123827-46123920 | 7121   | 75.76  |
| 12:46125000-46125097 | 15835  | 161.58 |
| 12:46205201-46205334 | 13517  | 100.87 |
| 12:46211453-46211671 | 18741  | 85.58  |
| 12:46215203-46215270 | 7927   | 116.57 |
| 12:46230372-46230438 | 3360   | 50.15  |
| 12:46230524-46230774 | 25705  | 102.41 |
| 12:46231104-46231200 | 10813  | 111.47 |
| 12:46231281-46231490 | 32500  | 154.76 |
| 12:46233112-46233279 | 36420  | 216.79 |
| 12:46240639-46240720 | 10805  | 131.77 |
| 12:46242619-46242753 | 10911  | 80.82  |
| 12:46243363-46243559 | 62239  | 315.93 |
| 12:46243819-46246679 | 431758 | 150.91 |
| 12:46254584-46254732 | 12183  | 81.77  |
| 12:46285563-46285701 | 14318  | 103.01 |
| 12:46285794-46285879 | 3415   | 39.71  |
| 12:46287203-46287326 | 7406   | 59.73  |
| 12:46287413-46287508 | 9252   | 96.38  |
| 12:46298125-46298143 | 0      | 0      |
| 12:46298717-46298861 | 6627   | 45.7   |
| 12:49415563-49415655 | 6175   | 66.4   |
| 12:49415826-49415934 | 28136  | 258.13 |
| 12:49416063-49416136 | 1089   | 14.72  |
| 12:49416373-49416658 | 37537  | 131.25 |
| 12:49417836-49417883 | 0      | 0      |
| 12:49418361-49418491 | 3715   | 28.36  |
| 12:49418593-49418729 | 2134   | 15.58  |
| 12:49419965-49421105 | 84292  | 73.88  |
| 12:49421586-49421713 | 629    | 4.91   |
| 12:49421792-49421924 | 4804   | 36.12  |
| 12:49422611-49422741 | 14088  | 107.54 |
| 12:49422844-49423019 | 4068   | 23.11  |
| 12:49423184-49423259 | 252    | 3.32   |
| 12:49424063-49424222 | 2195   | 13.72  |
| 12:49424384-49424551 | 4823   | 28.71  |
| 12:49424676-49424816 | 3811   | 27.03  |

© 2015 American Medical Association. All rights reserved.

|                      |       |        |
|----------------------|-------|--------|
| 12:49424958-49427747 | 51287 | 18.38  |
| 12:49427850-49428082 | 16591 | 71.21  |
| 12:49428193-49428259 | 2666  | 39.79  |
| 12:49428365-49428449 | 3314  | 38.99  |
| 12:49428595-49428718 | 7628  | 61.52  |
| 12:49430908-49432772 | 40762 | 21.86  |
| 12:49433005-49433141 | 4554  | 33.24  |
| 12:49433218-49433400 | 2351  | 12.85  |
| 12:49433507-49435318 | 41064 | 22.66  |
| 12:49435438-49435488 | 1002  | 19.65  |
| 12:49435700-49435773 | 816   | 11.03  |
| 12:49435872-49436113 | 2828  | 11.69  |
| 12:49436344-49436428 | 1471  | 17.31  |
| 12:49436524-49436661 | 7102  | 51.46  |
| 12:49436859-49436969 | 4225  | 38.06  |
| 12:49437146-49437211 | 10622 | 160.94 |
| 12:49437418-49437565 | 3086  | 20.85  |
| 12:49437651-49437781 | 12153 | 92.77  |
| 12:49437983-49438087 | 2348  | 22.36  |
| 12:49438186-49438305 | 8524  | 71.03  |
| 12:49438527-49438748 | 11780 | 53.06  |
| 12:49439703-49439750 | 1482  | 30.88  |
| 12:49439848-49439957 | 979   | 8.9    |
| 12:49440043-49440207 | 13520 | 81.94  |
| 12:49440392-49440573 | 17665 | 97.06  |
| 12:49441748-49441852 | 6511  | 62.01  |
| 12:49442442-49442552 | 27193 | 244.98 |
| 12:49442888-49443001 | 1240  | 10.88  |
| 12:49443465-49444573 | 45735 | 41.24  |
| 12:49444669-49446207 | 87960 | 57.15  |
| 12:49446347-49446492 | 1856  | 12.71  |
| 12:49446698-49446855 | 26774 | 169.46 |
| 12:49446990-49447104 | 13249 | 115.21 |
| 12:49447259-49447424 | 2132  | 12.84  |
| 12:49447761-49447923 | 4046  | 24.82  |
| 12:49448090-49448199 | 1238  | 11.25  |
| 12:49448311-49448534 | 4102  | 18.31  |
| 12:49448683-49448809 | 7406  | 58.31  |
| 12:49449059-49449107 | 1497  | 30.55  |
| 12:52345528-52345618 | 950   | 10.44  |
| 12:52369049-52369288 | 17959 | 74.83  |

© 2015 American Medical Association. All rights reserved.

|                      |       |        |
|----------------------|-------|--------|
| 12:52370111-52370359 | 29933 | 120.21 |
| 12:52374753-52374983 | 24687 | 106.87 |
| 12:52376470-52376592 | 0     | 0      |
| 12:52377783-52377950 | 10859 | 64.64  |
| 12:52378976-52379132 | 17680 | 112.61 |
| 12:52380602-52380929 | 16209 | 49.42  |
| 12:52385647-52385816 | 19910 | 117.12 |
| 12:52387769-52387894 | 14765 | 117.18 |
| 12:53895193-53895245 | 341   | 6.43   |
| 12:53895799-53895968 | 10109 | 59.46  |
| 12:53896811-53896917 | 137   | 1.28   |
| 12:53897497-53897592 | 13064 | 136.08 |
| 12:53898181-53898253 | 5849  | 80.12  |
| 12:53898396-53898599 | 16012 | 78.49  |
| 12:53898919-53899046 | 11296 | 88.25  |
| 12:53899433-53899634 | 13270 | 65.69  |
| 12:53899775-53899932 | 10553 | 66.79  |
| 12:56474085-56474166 | 248   | 3.02   |
| 12:56477535-56477686 | 32939 | 216.7  |
| 12:56478779-56479096 | 35501 | 111.64 |
| 12:56480315-56480440 | 21224 | 168.44 |
| 12:56481361-56481426 | 5208  | 78.91  |
| 12:56481579-56481697 | 14514 | 121.97 |
| 12:56481805-56481946 | 6441  | 45.36  |
| 12:56482327-56482440 | 21253 | 186.43 |
| 12:56482532-56482652 | 15117 | 124.93 |
| 12:56482908-56482912 | 0     | 0      |
| 12:56486531-56486604 | 7796  | 105.35 |
| 12:56486770-56486860 | 4713  | 51.79  |
| 12:56487129-56487334 | 12900 | 62.62  |
| 12:56487548-56487680 | 18854 | 141.76 |
| 12:56487883-56487973 | 11132 | 122.33 |
| 12:56488186-56488340 | 13027 | 84.05  |
| 12:56489041-56489094 | 5157  | 95.5   |
| 12:56489449-56489590 | 10594 | 74.61  |
| 12:56490287-56490406 | 20160 | 168    |
| 12:56490532-56490630 | 15526 | 156.83 |
| 12:56490829-56491014 | 14423 | 77.54  |
| 12:56491569-56491724 | 32324 | 207.21 |
| 12:56492284-56492433 | 11178 | 74.52  |
| 12:56492491-56492689 | 29353 | 147.5  |

© 2015 American Medical Association. All rights reserved.

|                        |       |        |
|------------------------|-------|--------|
| 12:56493432-56493529   | 10696 | 109.14 |
| 12:56493622-56493813   | 21349 | 111.19 |
| 12:56493958-56494029   | 7179  | 99.71  |
| 12:56494845-56495145   | 12410 | 41.23  |
| 12:56495313-56495839   | 45441 | 86.23  |
| 12:58142308-58142400   | 27642 | 297.23 |
| 12:58142965-58143100   | 15020 | 110.44 |
| 12:58143237-58143287   | 2619  | 51.35  |
| 12:58144263-58144346   | 439   | 5.23   |
| 12:58144439-58144548   | 13239 | 120.35 |
| 12:58144706-58144873   | 21837 | 129.98 |
| 12:58144990-58145125   | 25401 | 186.77 |
| 12:58145283-58145500   | 13342 | 61.2   |
| 12:69202258-69202271   | 787   | 56.21  |
| 12:69202988-69203078   | 37730 | 414.62 |
| 12:69207334-69207408   | 7491  | 99.88  |
| 12:69208383-69208439   | 0     | 0      |
| 12:69209408-69209500   | 0     | 0      |
| 12:69210592-69210725   | 7705  | 57.5   |
| 12:69214105-69214154   | 4690  | 93.8   |
| 12:69218143-69218210   | 2894  | 42.56  |
| 12:69218335-69218431   | 9139  | 94.22  |
| 12:69222551-69222711   | 27444 | 170.46 |
| 12:69229609-69229764   | 23327 | 149.53 |
| 12:69230378-69230392   | 579   | 38.6   |
| 12:69230452-69230529   | 20223 | 259.27 |
| 12:69233054-69233629   | 68457 | 118.85 |
| 12:103352023-103352733 | 11060 | 15.56  |
| 12:112856916-112856929 | 0     | 0      |
| 12:112884080-112884202 | 10377 | 84.37  |
| 12:112888122-112888316 | 26635 | 136.59 |
| 12:112890999-112891191 | 18132 | 93.95  |
| 12:112892368-112892484 | 7823  | 66.86  |
| 12:112892598-112892603 | 30    | 5      |
| 12:112893754-112893867 | 6313  | 55.38  |
| 12:112895095-112895130 | 0     | 0      |
| 12:112910748-112910844 | 7202  | 74.25  |
| 12:112915455-112915534 | 8908  | 111.35 |
| 12:112915661-112915819 | 8835  | 55.57  |
| 12:112919878-112920009 | 9514  | 72.08  |
| 12:112924279-112924437 | 7881  | 49.57  |

© 2015 American Medical Association. All rights reserved.

|                        |       |        |
|------------------------|-------|--------|
| 12:112926247-112926314 | 8484  | 124.76 |
| 12:112926828-112926979 | 27500 | 180.92 |
| 12:112939948-112940060 | 14118 | 124.94 |
| 12:112942499-112942568 | 2120  | 30.29  |
| 12:121416429-121416897 | 4278  | 9.12   |
| 12:121426636-121426835 | 11308 | 56.54  |
| 12:121431323-121431509 | 5625  | 30.08  |
| 12:121431967-121432208 | 3474  | 14.36  |
| 12:121434065-121434216 | 15964 | 105.03 |
| 12:121434344-121434799 | 7385  | 16.2   |
| 12:121435277-121435594 | 6918  | 21.75  |
| 12:121437071-121437430 | 23314 | 64.76  |
| 12:121438868-121438995 | 2351  | 18.37  |
| 12:121439584-121439596 | 0     | 0      |
| 12:121439879-121439935 | 0     | 0      |
| 12:121440241-121440288 | 0     | 0      |
| 13:26828779-26828906   | 5979  | 46.71  |
| 13:26911704-26911779   | 7569  | 99.59  |
| 13:26923209-26923319   | 26937 | 242.68 |
| 13:26927877-26928017   | 12431 | 88.16  |
| 13:26956951-26957008   | 7207  | 124.26 |
| 13:26959348-26959479   | 12183 | 92.3   |
| 13:26967504-26967647   | 46795 | 324.97 |
| 13:26970422-26970491   | 1963  | 28.04  |
| 13:26971290-26971362   | 7495  | 102.67 |
| 13:26974590-26974687   | 18784 | 191.67 |
| 13:26975406-26975484   | 4094  | 51.82  |
| 13:26975603-26975761   | 20167 | 126.84 |
| 13:26978093-26978218   | 42999 | 341.26 |
| 13:28578189-28578311   | 8218  | 66.81  |
| 13:28588589-28588694   | 6620  | 62.45  |
| 13:28589294-28589393   | 4357  | 43.57  |
| 13:28589727-28589838   | 9482  | 84.66  |
| 13:28592595-28592726   | 14414 | 109.2  |
| 13:28597487-28597614   | 7097  | 55.45  |
| 13:28598998-28599080   | 12172 | 146.65 |
| 13:28599540-28599552   | 0     | 0      |
| 13:28601225-28601378   | 20636 | 134    |
| 13:28602315-28602425   | 5474  | 49.32  |
| 13:28608024-28608128   | 19812 | 188.69 |
| 13:28608219-28608351   | 3967  | 29.83  |

© 2015 American Medical Association. All rights reserved.

|                      |       |        |
|----------------------|-------|--------|
| 13:28608438-28608544 | 8731  | 81.6   |
| 13:28609632-28609810 | 18843 | 105.27 |
| 13:28610072-28610180 | 19928 | 182.83 |
| 13:28611322-28611425 | 15994 | 153.79 |
| 13:28622412-28622580 | 20126 | 119.09 |
| 13:28623521-28623674 | 32193 | 209.05 |
| 13:28623772-28623911 | 13510 | 96.5   |
| 13:28624232-28624359 | 12967 | 101.3  |
| 13:28626682-28626811 | 9406  | 72.35  |
| 13:28631484-28631599 | 9549  | 82.32  |
| 13:28636004-28636206 | 16458 | 81.07  |
| 13:28644628-28644749 | 12286 | 100.7  |
| 13:28674605-28674647 | 0     | 0      |
| 13:28877304-28877505 | 19695 | 97.5   |
| 13:28880815-28880909 | 8667  | 91.23  |
| 13:28882980-28883064 | 7301  | 85.89  |
| 13:28885727-28885869 | 11421 | 79.87  |
| 13:28886130-28886235 | 8550  | 80.66  |
| 13:28891635-28891734 | 7049  | 70.49  |
| 13:28893560-28893671 | 3471  | 30.99  |
| 13:28895600-28895722 | 10424 | 84.75  |
| 13:28896399-28896496 | 6306  | 64.35  |
| 13:28896593-28896614 | 46    | 2.09   |
| 13:28896927-28897083 | 13809 | 87.96  |
| 13:28901599-28901687 | 6049  | 67.97  |
| 13:28903752-28903865 | 4867  | 42.69  |
| 13:28908162-28908266 | 31044 | 295.66 |
| 13:28913305-28913437 | 6300  | 47.37  |
| 13:28919582-28919688 | 3303  | 30.87  |
| 13:28931691-28931822 | 18975 | 143.75 |
| 13:28942715-28942800 | 0     | 0      |
| 13:28959022-28959168 | 20494 | 139.41 |
| 13:28963933-28964241 | 46873 | 151.69 |
| 13:28970943-28970986 | 74    | 1.68   |
| 13:28971097-28971205 | 4625  | 42.43  |
| 13:28973181-28973255 | 0     | 0      |
| 13:28979917-28980031 | 15350 | 133.48 |
| 13:29001296-29001455 | 29212 | 182.58 |
| 13:29001889-29002058 | 33576 | 197.51 |
| 13:29004187-29004304 | 10771 | 91.28  |
| 13:29005273-29005447 | 20455 | 116.89 |

© 2015 American Medical Association. All rights reserved.

|                      |        |        |
|----------------------|--------|--------|
| 13:29007956-29008092 | 20056  | 146.39 |
| 13:29008195-29008357 | 17660  | 108.34 |
| 13:29012358-29012482 | 6074   | 48.59  |
| 13:29041040-29041266 | 38797  | 170.91 |
| 13:29041658-29041754 | 3685   | 37.99  |
| 13:29068917-29068980 | 892    | 13.94  |
| 13:29598806-29601040 | 122536 | 54.83  |
| 13:29608022-29608262 | 13694  | 56.82  |
| 13:29674910-29675107 | 1003   | 5.07   |
| 13:29855841-29856002 | 9626   | 59.42  |
| 13:29898750-29898848 | 1127   | 11.38  |
| 13:29933399-29933610 | 4572   | 21.57  |
| 13:30002980-30003033 | 5955   | 110.28 |
| 13:30014120-30014186 | 639    | 9.54   |
| 13:30054217-30054501 | 974    | 3.42   |
| 13:30062037-30062142 | 14455  | 136.37 |
| 13:30066783-30066856 | 3119   | 42.15  |
| 13:30071375-30071473 | 2172   | 21.94  |
| 13:30072555-30072674 | 6810   | 56.75  |
| 13:30075234-30075331 | 4980   | 50.82  |
| 13:30077130-30077343 | 9080   | 42.43  |
| 13:32890598-32890664 | 4391   | 65.54  |
| 13:32893214-32893462 | 17076  | 68.58  |
| 13:32899213-32899321 | 8794   | 80.68  |
| 13:32900238-32900287 | 9722   | 194.44 |
| 13:32900379-32900419 | 2444   | 59.61  |
| 13:32900636-32900750 | 10480  | 91.13  |
| 13:32903580-32903629 | 2824   | 56.48  |
| 13:32905056-32905167 | 5208   | 46.5   |
| 13:32906409-32907524 | 117000 | 104.84 |
| 13:32910402-32915333 | 373555 | 75.74  |
| 13:32918695-32918790 | 2741   | 28.55  |
| 13:32920964-32921033 | 4851   | 69.3   |
| 13:32928998-32929425 | 34942  | 81.64  |
| 13:32930565-32930746 | 38487  | 211.47 |
| 13:32931879-32932066 | 18337  | 97.54  |
| 13:32936660-32936830 | 11881  | 69.48  |
| 13:32937316-32937670 | 34711  | 97.78  |
| 13:32944539-32944694 | 20452  | 131.1  |
| 13:32945093-32945237 | 8023   | 55.33  |
| 13:32949480-32949543 | 0      | 0      |

© 2015 American Medical Association. All rights reserved.

|                        |       |        |
|------------------------|-------|--------|
| 13:32950807-32950928   | 7310  | 59.92  |
| 13:32953454-32953652   | 16231 | 81.56  |
| 13:32953887-32954050   | 9218  | 56.21  |
| 13:32954144-32954282   | 7639  | 54.96  |
| 13:32968826-32969070   | 12500 | 51.02  |
| 13:32970128-32970229   | 0     | 0      |
| 13:32971035-32971181   | 49797 | 338.76 |
| 13:32972299-32972907   | 54759 | 89.92  |
| 13:48878049-48878185   | 19    | 0.14   |
| 13:48881416-48881542   | 14447 | 113.76 |
| 13:48916735-48916850   | 8372  | 72.17  |
| 13:48919216-48919335   | 18556 | 154.63 |
| 13:48921961-48921999   | 2059  | 52.79  |
| 13:48923092-48923159   | 4143  | 60.93  |
| 13:48934153-48934263   | 11438 | 103.05 |
| 13:48936951-48937093   | 17245 | 120.59 |
| 13:48939030-48939107   | 1154  | 14.79  |
| 13:48941630-48941739   | 13010 | 118.27 |
| 13:48942663-48942740   | 10154 | 130.18 |
| 13:48947541-48947628   | 20130 | 228.75 |
| 13:48951054-48951170   | 15456 | 132.1  |
| 13:48953730-48953786   | 1992  | 34.95  |
| 13:48954189-48954220   | 178   | 5.56   |
| 13:48954301-48954377   | 2966  | 38.52  |
| 13:48955383-48955579   | 9283  | 47.12  |
| 13:49027129-49027247   | 9864  | 82.89  |
| 13:49030340-49030485   | 6101  | 41.79  |
| 13:49033824-49033969   | 17495 | 119.83 |
| 13:49037867-49037971   | 14971 | 142.58 |
| 13:49039134-49039247   | 7182  | 63     |
| 13:49039341-49039504   | 17221 | 105.01 |
| 13:49047496-49047526   | 4777  | 154.1  |
| 13:49050837-49050979   | 14015 | 98.01  |
| 13:49051491-49051540   | 2835  | 56.7   |
| 13:49054134-49054207   | 7186  | 97.11  |
| 13:103459705-103460095 | 32497 | 83.11  |
| 13:103468778-103468904 | 11245 | 88.54  |
| 13:103473387-103473482 | 13182 | 137.31 |
| 13:103474093-103474197 | 14540 | 138.48 |
| 13:103474415-103474509 | 7910  | 83.26  |
| 13:103483915-103484047 | 14850 | 111.65 |

© 2015 American Medical Association. All rights reserved.



|                        |        |        |
|------------------------|--------|--------|
| 13:103486816-103486902 | 11595  | 133.28 |
| 13:103490993-103491089 | 6703   | 69.1   |
| 13:103491922-103492153 | 35097  | 151.28 |
| 13:103498617-103498704 | 3538   | 40.2   |
| 13:103501468-103501544 | 5195   | 67.47  |
| 13:103504468-103504643 | 9959   | 56.59  |
| 13:103506107-103506222 | 3089   | 26.63  |
| 13:103506638-103506724 | 7000   | 80.46  |
| 13:103508402-103508462 | 8067   | 132.25 |
| 13:103510625-103510768 | 18601  | 129.17 |
| 13:103511261-103511287 | 0      | 0      |
| 13:103513857-103514064 | 33020  | 158.75 |
| 13:103514380-103515453 | 116393 | 108.37 |
| 13:103518017-103518261 | 17566  | 71.7   |
| 13:103518612-103518731 | 8469   | 70.58  |
| 13:103518982-103519195 | 7855   | 36.71  |
| 13:103520463-103520607 | 22917  | 158.05 |
| 13:103524548-103524748 | 12764  | 63.5   |
| 13:103525609-103525693 | 21301  | 250.6  |
| 13:103527657-103528253 | 35370  | 59.25  |
| 14:35871219-35871266   | 5798   | 120.79 |
| 14:35871600-35871869   | 31060  | 115.04 |
| 14:35871977-35872065   | 5763   | 64.75  |
| 14:35872356-35872566   | 24059  | 114.02 |
| 14:35872896-35873004   | 1729   | 15.86  |
| 14:35873624-35873850   | 3950   | 17.4   |
| 14:36986483-36987225   | 6755   | 9.09   |
| 14:36988190-36988575   | 4911   | 12.72  |
| 14:36988792-36988817   | 0      | 0      |
| 14:36989258-36989334   | 2968   | 38.55  |
| 14:38060570-38061916   | 44640  | 33.14  |
| 14:38063343-38063381   | 0      | 0      |
| 14:38064106-38064177   | 3622   | 50.31  |
| 14:45605235-45605742   | 39929  | 78.6   |
| 14:45606272-45606444   | 10819  | 62.54  |
| 14:45609835-45609912   | 8963   | 114.91 |
| 14:45618040-45618198   | 6996   | 44     |
| 14:45620600-45620731   | 9758   | 73.92  |
| 14:45623123-45623255   | 28696  | 215.76 |
| 14:45623900-45624025   | 8009   | 63.56  |
| 14:45624576-45624662   | 5981   | 68.75  |

© 2015 American Medical Association. All rights reserved.

|                      |        |        |
|----------------------|--------|--------|
| 14:45628299-45628483 | 7563   | 40.88  |
| 14:45633562-45633768 | 13561  | 65.51  |
| 14:45636153-45636374 | 25096  | 113.05 |
| 14:45639792-45639949 | 6530   | 41.33  |
| 14:45642258-45642413 | 18056  | 115.74 |
| 14:45644274-45646179 | 146472 | 76.85  |
| 14:45650633-45650727 | 7247   | 76.28  |
| 14:45650840-45650908 | 2158   | 31.28  |
| 14:45652977-45653105 | 4756   | 36.87  |
| 14:45654420-45654576 | 6236   | 39.72  |
| 14:45656984-45657090 | 6735   | 62.94  |
| 14:45658005-45658565 | 68569  | 122.23 |
| 14:45664684-45664788 | 0      | 0      |
| 14:45665375-45665750 | 57390  | 152.63 |
| 14:45667847-45668138 | 24320  | 83.29  |
| 14:45669073-45669211 | 20015  | 143.99 |
| 14:62162523-62162557 | 213    | 6.09   |
| 14:62164569-62164672 | 0      | 0      |
| 14:62187097-62187290 | 14643  | 75.48  |
| 14:62188227-62188372 | 20651  | 141.45 |
| 14:62188457-62188541 | 6136   | 72.19  |
| 14:62193424-62193536 | 8618   | 76.27  |
| 14:62194171-62194373 | 37798  | 186.2  |
| 14:62199136-62199242 | 24433  | 228.35 |
| 14:62200856-62201003 | 15872  | 107.24 |
| 14:62203607-62203827 | 17947  | 81.21  |
| 14:62204805-62205091 | 55381  | 192.97 |
| 14:62207223-62207345 | 10467  | 85.1   |
| 14:62207473-62207906 | 46460  | 107.05 |
| 14:62211423-62211531 | 8227   | 75.48  |
| 14:62212409-62212535 | 18444  | 145.23 |
| 14:62213652-62213803 | 17763  | 116.86 |
| 14:68290261-68290344 | 7306   | 86.98  |
| 14:68292181-68292294 | 11768  | 103.23 |
| 14:68301797-68301913 | 7184   | 61.4   |
| 14:68331505-68331516 | 0      | 0      |
| 14:68331720-68331856 | 7252   | 52.93  |
| 14:68352586-68352705 | 18331  | 152.76 |
| 14:68353738-68353921 | 18051  | 98.1   |
| 14:68758601-68758697 | 11790  | 121.55 |
| 14:68878141-68878244 | 11728  | 112.77 |

© 2015 American Medical Association. All rights reserved.

|                      |        |        |
|----------------------|--------|--------|
| 14:68934889-68934967 | 10605  | 134.24 |
| 14:68935000-68935013 | 2642   | 188.71 |
| 14:68935810-68935823 | 745    | 53.21  |
| 14:68937240-68937250 | 0      | 0      |
| 14:68944365-68944381 | 608    | 35.76  |
| 14:69012279-69012341 | 0      | 0      |
| 14:69061202-69061320 | 171    | 1.44   |
| 14:69077723-69077964 | 0      | 0      |
| 14:69117498-69117562 | 1430   | 22     |
| 14:71197097-71197581 | 20181  | 41.61  |
| 14:71199256-71200092 | 36442  | 43.54  |
| 14:71200474-71200515 | 0      | 0      |
| 14:71201103-71201215 | 10561  | 93.46  |
| 14:71202678-71202746 | 4887   | 70.83  |
| 14:71204962-71205115 | 10984  | 71.32  |
| 14:71206615-71206881 | 16409  | 61.46  |
| 14:71209068-71209308 | 13329  | 55.31  |
| 14:71215546-71215721 | 18091  | 102.79 |
| 14:71216650-71216798 | 11011  | 73.9   |
| 14:71227719-71227903 | 18382  | 99.36  |
| 14:71232159-71232189 | 0      | 0      |
| 14:71267384-71267797 | 47826  | 115.52 |
| 14:71275483-71275888 | 3824   | 9.42   |
| 14:81422025-81422194 | 27612  | 162.42 |
| 14:81528492-81528563 | 5839   | 81.1   |
| 14:81534598-81534672 | 11268  | 150.24 |
| 14:81554249-81554270 | 965    | 43.86  |
| 14:81554298-81554372 | 5962   | 79.49  |
| 14:81557413-81557487 | 8887   | 118.49 |
| 14:81558875-81558952 | 13736  | 176.1  |
| 14:81562983-81563051 | 6899   | 99.99  |
| 14:81574719-81574800 | 14512  | 176.98 |
| 14:81574893-81575025 | 9602   | 72.2   |
| 14:81606023-81606211 | 10447  | 55.28  |
| 14:81609284-81610697 | 210646 | 148.97 |
| 14:95556835-95557000 | 42118  | 253.72 |
| 14:95557371-95557446 | 5357   | 70.49  |
| 14:95557540-95557702 | 49786  | 305.44 |
| 14:95560225-95560493 | 36441  | 135.47 |
| 14:95562109-95563050 | 116808 | 124    |
| 14:95566117-95566272 | 17617  | 112.93 |

© 2015 American Medical Association. All rights reserved.

|                        |       |        |
|------------------------|-------|--------|
| 14:95569683-95570463   | 97366 | 124.67 |
| 14:95571408-95571583   | 35314 | 200.65 |
| 14:95572015-95572120   | 9183  | 86.63  |
| 14:95572378-95572560   | 38001 | 207.66 |
| 14:95573945-95574098   | 11539 | 74.93  |
| 14:95574217-95574430   | 14271 | 66.69  |
| 14:95574661-95574840   | 23367 | 129.82 |
| 14:95577654-95577793   | 29365 | 209.75 |
| 14:95578509-95578584   | 6055  | 79.67  |
| 14:95579429-95579561   | 15031 | 113.02 |
| 14:95582004-95582158   | 31603 | 203.89 |
| 14:95582790-95583032   | 46837 | 192.74 |
| 14:95583959-95584091   | 16071 | 120.83 |
| 14:95590533-95591005   | 61480 | 129.98 |
| 14:95592917-95593085   | 34137 | 201.99 |
| 14:95595809-95595969   | 9489  | 58.94  |
| 14:95596395-95596529   | 8790  | 65.11  |
| 14:95597846-95597976   | 17547 | 133.95 |
| 14:95598852-95599014   | 28913 | 177.38 |
| 14:95599652-95599795   | 6580  | 45.69  |
| 14:102548049-102548158 | 12428 | 112.98 |
| 14:102548448-102548781 | 36646 | 109.72 |
| 14:102549347-102549639 | 24201 | 82.6   |
| 14:102549883-102550030 | 13162 | 88.93  |
| 14:102550130-102550320 | 7443  | 38.97  |
| 14:102550736-102550901 | 11212 | 67.54  |
| 14:102551018-102551335 | 15371 | 48.34  |
| 14:102551635-102551768 | 4843  | 36.14  |
| 14:102552095-102552461 | 34969 | 95.28  |
| 14:102552554-102552715 | 16177 | 99.86  |
| 14:102568212-102568422 | 15196 | 72.02  |
| 14:102605587-102605741 | 2876  | 18.55  |
| 14:105235923-105235963 | 0     | 0      |
| 14:105236678-105236757 | 1764  | 22.05  |
| 14:105237082-105237184 | 3118  | 30.27  |
| 14:105238702-105238789 | 6007  | 68.26  |
| 14:105239215-105239429 | 10276 | 47.8   |
| 14:105239588-105239716 | 3116  | 24.16  |
| 14:105239792-105239917 | 1000  | 7.94   |
| 14:105240249-105240317 | 1396  | 20.23  |
| 14:105241275-105241340 | 2614  | 39.61  |

© 2015 American Medical Association. All rights reserved.

|                        |       |        |
|------------------------|-------|--------|
| 14:105241413-105241544 | 6674  | 50.56  |
| 14:105241989-105242136 | 5768  | 38.97  |
| 14:105242996-105243107 | 4777  | 42.65  |
| 14:105246425-105246553 | 2613  | 20.26  |
| 14:105258935-105258980 | 4952  | 107.65 |
| 15:40453422-40453456   | 569   | 16.26  |
| 15:40457254-40457397   | 24346 | 169.07 |
| 15:40458560-40458671   | 0     | 0      |
| 15:40462263-40462364   | 10558 | 103.51 |
| 15:40462738-40462882   | 12433 | 85.74  |
| 15:40466153-40466163   | 0     | 0      |
| 15:40468678-40468874   | 20737 | 105.26 |
| 15:40475915-40476084   | 11713 | 68.9   |
| 15:40477366-40477580   | 31477 | 146.4  |
| 15:40477752-40477843   | 15034 | 163.41 |
| 15:40488746-40488975   | 16809 | 73.08  |
| 15:40491816-40491928   | 6062  | 53.65  |
| 15:40492445-40492560   | 8471  | 73.03  |
| 15:40493132-40493181   | 7868  | 157.36 |
| 15:40494591-40494666   | 2417  | 31.8   |
| 15:40494790-40494895   | 22394 | 211.26 |
| 15:40498385-40498659   | 23037 | 83.77  |
| 15:40500838-40500971   | 6873  | 51.29  |
| 15:40501836-40501976   | 22083 | 156.62 |
| 15:40502311-40502411   | 10428 | 103.25 |
| 15:40504700-40504849   | 8463  | 56.42  |
| 15:40505533-40505675   | 15445 | 108.01 |
| 15:40509697-40509868   | 54939 | 319.41 |
| 15:40510657-40510763   | 4684  | 43.78  |
| 15:40512765-40512960   | 31451 | 160.46 |
| 15:66679686-66679765   | 241   | 3.01   |
| 15:66727365-66727575   | 25892 | 122.71 |
| 15:66729084-66729230   | 12830 | 87.28  |
| 15:66735618-66735695   | 4920  | 63.08  |
| 15:66736994-66737045   | 6028  | 115.92 |
| 15:66745842-66745881   | 0     | 0      |
| 15:66774093-66774217   | 7354  | 58.83  |
| 15:66777328-66777529   | 19220 | 95.15  |
| 15:66779566-66779630   | 8355  | 128.54 |
| 15:66781553-66781614   | 6994  | 112.81 |
| 15:66782056-66782101   | 6202  | 134.83 |

© 2015 American Medical Association. All rights reserved.

|                      |       |        |
|----------------------|-------|--------|
| 15:66782840-66782953 | 16953 | 148.71 |
| 15:67358493-67358698 | 5271  | 25.59  |
| 15:67391212-67391362 | 0     | 0      |
| 15:67430365-67430438 | 0     | 0      |
| 15:67457233-67457426 | 24885 | 128.27 |
| 15:67457591-67457722 | 31358 | 237.56 |
| 15:67459117-67459191 | 1107  | 14.76  |
| 15:67462892-67462942 | 7235  | 141.86 |
| 15:67473579-67473791 | 11718 | 55.01  |
| 15:67477065-67477202 | 11586 | 83.96  |
| 15:67479358-67479468 | 0     | 0      |
| 15:67479703-67479847 | 20623 | 142.23 |
| 15:67482751-67482874 | 9462  | 76.31  |
| 15:88420166-88420351 | 20813 | 111.9  |
| 15:88423501-88423659 | 19596 | 123.25 |
| 15:88428925-88428966 | 0     | 0      |
| 15:88459777-88459791 | 0     | 0      |
| 15:88472413-88472665 | 20914 | 82.66  |
| 15:88474431-88474467 | 352   | 9.51   |
| 15:88476243-88476415 | 13220 | 76.42  |
| 15:88483854-88483984 | 23041 | 175.89 |
| 15:88522576-88522694 | 10933 | 91.87  |
| 15:88524457-88524591 | 3924  | 29.07  |
| 15:88576088-88576276 | 9787  | 51.78  |
| 15:88669502-88669604 | 7669  | 74.46  |
| 15:88670393-88670457 | 3924  | 60.37  |
| 15:88671942-88671965 | 3080  | 128.33 |
| 15:88678332-88678628 | 26837 | 90.36  |
| 15:88679130-88679271 | 19509 | 137.39 |
| 15:88679698-88679840 | 7173  | 50.16  |
| 15:88680635-88680792 | 5187  | 32.83  |
| 15:88690566-88690634 | 4267  | 61.84  |
| 15:88726649-88726720 | 9106  | 126.47 |
| 15:88727456-88727530 | 3488  | 46.51  |
| 15:88799137-88799384 | 20870 | 84.15  |
| 15:89790879-89790962 | 8192  | 97.52  |
| 15:89801935-89802007 | 9436  | 129.26 |
| 15:89803944-89804074 | 22224 | 169.65 |
| 15:89804816-89804972 | 39533 | 251.8  |
| 15:89805052-89805109 | 5377  | 92.71  |
| 15:89806650-89806691 | 6633  | 157.93 |

© 2015 American Medical Association. All rights reserved.

|                      |       |        |
|----------------------|-------|--------|
| 15:89807134-89807268 | 13301 | 98.53  |
| 15:89807753-89807842 | 7442  | 82.69  |
| 15:89811630-89811774 | 35092 | 242.01 |
| 15:89816608-89816700 | 17414 | 187.25 |
| 15:89817399-89817535 | 3646  | 26.61  |
| 15:89819942-89820122 | 22629 | 125.02 |
| 15:89821918-89822005 | 9835  | 111.76 |
| 15:89824401-89824531 | 15780 | 120.46 |
| 15:89824996-89825066 | 12473 | 175.68 |
| 15:89826367-89826481 | 22977 | 199.8  |
| 15:89828327-89828449 | 25562 | 207.82 |
| 15:89833444-89833512 | 7206  | 104.43 |
| 15:89834844-89834945 | 11701 | 114.72 |
| 15:89835919-89836095 | 31198 | 176.26 |
| 15:89836173-89836294 | 6975  | 57.17  |
| 15:89837064-89837228 | 18181 | 110.19 |
| 15:89838146-89838325 | 0     | 0      |
| 15:89843031-89843197 | 22372 | 133.96 |
| 15:89843531-89843616 | 5429  | 63.13  |
| 15:89844557-89844673 | 9426  | 80.56  |
| 15:89847095-89847146 | 4124  | 79.31  |
| 15:89848346-89848473 | 22110 | 172.73 |
| 15:89848572-89848640 | 5609  | 81.29  |
| 15:89848836-89848929 | 13247 | 140.93 |
| 15:89849238-89849425 | 21318 | 113.39 |
| 15:89850707-89850760 | 1206  | 22.33  |
| 15:89850844-89850903 | 6639  | 110.65 |
| 15:89856135-89856203 | 2389  | 34.62  |
| 15:89857843-89857938 | 7379  | 76.86  |
| 15:89858513-89858620 | 13323 | 123.36 |
| 15:89859628-89859690 | 1070  | 16.98  |
| 15:90627498-90627585 | 3525  | 40.06  |
| 15:90628048-90628140 | 11669 | 125.47 |
| 15:90628233-90628330 | 8855  | 90.36  |
| 15:90628507-90628619 | 70    | 0.62   |
| 15:90630344-90630495 | 10019 | 65.91  |
| 15:90630671-90630807 | 14896 | 108.73 |
| 15:90631591-90631734 | 11759 | 81.66  |
| 15:90631819-90631979 | 10552 | 65.54  |
| 15:90633711-90633876 | 9887  | 59.56  |
| 15:90634785-90634876 | 11933 | 129.71 |

© 2015 American Medical Association. All rights reserved.

|                      |       |        |
|----------------------|-------|--------|
| 15:90645508-90645622 | 0     | 0      |
| 15:91290623-91290720 | 3239  | 33.05  |
| 15:91292597-91293297 | 53793 | 76.74  |
| 15:91295017-91295176 | 14185 | 88.66  |
| 15:91298041-91298168 | 5691  | 44.46  |
| 15:91303211-91303365 | 522   | 3.37   |
| 15:91303377-91303509 | 10550 | 79.32  |
| 15:91303824-91304485 | 67483 | 101.94 |
| 15:91306196-91306387 | 24572 | 127.98 |
| 15:91308526-91308644 | 10252 | 86.15  |
| 15:91310140-91310253 | 9692  | 85.02  |
| 15:91312363-91312461 | 24770 | 250.2  |
| 15:91312668-91312816 | 8790  | 58.99  |
| 15:91326052-91326158 | 4589  | 42.89  |
| 15:91328151-91328311 | 17878 | 111.04 |
| 15:91333879-91334074 | 29797 | 152.03 |
| 15:91337397-91337587 | 11790 | 61.73  |
| 15:91341420-91341567 | 17317 | 117.01 |
| 15:91346751-91346950 | 19019 | 95.1   |
| 15:91347397-91347589 | 18648 | 96.62  |
| 15:91352367-91352489 | 24148 | 196.33 |
| 15:91354435-91354636 | 11482 | 56.84  |
| 15:91358332-91358509 | 15479 | 86.96  |
| 15:99192811-99192904 | 3305  | 35.16  |
| 15:99250791-99251336 | 37014 | 67.79  |
| 15:99434554-99434866 | 18492 | 59.08  |
| 15:99439986-99440134 | 13185 | 88.49  |
| 15:99442706-99442850 | 17514 | 120.79 |
| 15:99451914-99452128 | 6458  | 30.04  |
| 15:99454544-99454670 | 12370 | 97.4   |
| 15:99456273-99456511 | 16933 | 70.85  |
| 15:99459193-99459360 | 26774 | 159.37 |
| 15:99459901-99460105 | 11091 | 54.1   |
| 15:99465377-99465660 | 20873 | 73.5   |
| 15:99467105-99467241 | 10330 | 75.4   |
| 15:99467754-99467913 | 26134 | 163.34 |
| 15:99472787-99472889 | 21297 | 206.77 |
| 15:99473464-99473534 | 3766  | 53.04  |
| 15:99478053-99478282 | 17022 | 74.01  |
| 15:99478545-99478655 | 91    | 0.82   |
| 15:99482430-99482589 | 28030 | 175.19 |

© 2015 American Medical Association. All rights reserved.



|                      |       |        |
|----------------------|-------|--------|
| 15:99486152-99486281 | 17840 | 137.23 |
| 15:99491803-99491937 | 13143 | 97.36  |
| 15:99500290-99500671 | 21352 | 55.9   |
| 16:2098271-2098274   | 0     | 0      |
| 16:2098588-2098754   | 11925 | 71.41  |
| 16:2100401-2100487   | 3165  | 36.38  |
| 16:2103343-2103543   | 671   | 3.34   |
| 16:2104297-2104441   | 7683  | 52.99  |
| 16:2105403-2105521   | 16026 | 134.67 |
| 16:2106162-2106245   | 4845  | 57.68  |
| 16:2106645-2106770   | 6415  | 50.91  |
| 16:2107106-2107179   | 0     | 0      |
| 16:2108748-2108874   | 560   | 4.41   |
| 16:2110671-2110814   | 10910 | 75.76  |
| 16:2111872-2112009   | 6219  | 45.07  |
| 16:2112498-2112601   | 697   | 6.7    |
| 16:2112973-2113054   | 0     | 0      |
| 16:2114273-2114428   | 13424 | 86.05  |
| 16:2115520-2115636   | 9204  | 78.67  |
| 16:2120457-2120579   | 7172  | 58.31  |
| 16:2121511-2121617   | 3796  | 35.48  |
| 16:2121785-2121935   | 579   | 3.83   |
| 16:2122242-2122364   | 5592  | 45.46  |
| 16:2122850-2122984   | 4512  | 33.42  |
| 16:2124201-2124390   | 9873  | 51.96  |
| 16:2125800-2125893   | 5902  | 62.79  |
| 16:2126069-2126171   | 8159  | 79.21  |
| 16:2126492-2126586   | 8391  | 88.33  |
| 16:2127599-2127727   | 8798  | 68.2   |
| 16:2129033-2129197   | 7544  | 45.72  |
| 16:2129277-2129429   | 7737  | 50.57  |
| 16:2129558-2129670   | 1641  | 14.52  |
| 16:2130166-2130378   | 11222 | 52.69  |
| 16:2131596-2131799   | 12756 | 62.53  |
| 16:2132437-2132505   | 5594  | 81.07  |
| 16:2133191-2133255   | 0     | 0      |
| 16:2133696-2133817   | 1039  | 8.52   |
| 16:2134229-2134716   | 9130  | 18.71  |
| 16:2134952-2135027   | 7701  | 101.33 |
| 16:2135231-2135323   | 4661  | 50.12  |
| 16:2136194-2136380   | 5554  | 29.7   |

© 2015 American Medical Association. All rights reserved.

|                    |        |        |
|--------------------|--------|--------|
| 16:2136733-2136872 | 3386   | 24.19  |
| 16:2137864-2137942 | 1459   | 18.47  |
| 16:2138049-2138140 | 8623   | 93.73  |
| 16:2138228-2138326 | 9605   | 97.02  |
| 16:2138447-2138611 | 6804   | 41.24  |
| 16:2588114-2588137 | 0      | 0      |
| 16:2588503-2588586 | 0      | 0      |
| 16:2588620-2588763 | 115    | 0.8    |
| 16:2607704-2607964 | 35617  | 136.46 |
| 16:2611481-2611523 | 2972   | 69.12  |
| 16:2611772-2611909 | 40781  | 295.51 |
| 16:2615554-2615698 | 41976  | 289.49 |
| 16:2616357-2616458 | 29801  | 292.17 |
| 16:2627426-2627501 | 4726   | 62.18  |
| 16:2631296-2631364 | 14859  | 215.35 |
| 16:2631608-2631704 | 9174   | 94.58  |
| 16:2633413-2633586 | 33032  | 189.84 |
| 16:2636677-2636894 | 28546  | 130.94 |
| 16:2645794-2645851 | 3352   | 57.79  |
| 16:2647124-2647276 | 9448   | 61.75  |
| 16:2647652-2647768 | 5540   | 47.35  |
| 16:3777719-3779875 | 149391 | 69.26  |
| 16:3781193-3781474 | 10041  | 35.61  |
| 16:3781777-3781938 | 12623  | 77.92  |
| 16:3786037-3786204 | 13550  | 80.65  |
| 16:3786651-3786816 | 18778  | 113.12 |
| 16:3788560-3788673 | 4707   | 41.29  |
| 16:3789579-3789725 | 8625   | 58.67  |
| 16:3790400-3790550 | 10440  | 69.14  |
| 16:3794895-3794962 | 6114   | 89.91  |
| 16:3795278-3795355 | 5890   | 75.51  |
| 16:3799628-3799684 | 1101   | 19.32  |
| 16:3801727-3801807 | 7899   | 97.52  |
| 16:3807289-3807377 | 3696   | 41.53  |
| 16:3807810-3808049 | 14325  | 59.69  |
| 16:3808855-3808973 | 7637   | 64.18  |
| 16:3817721-3817910 | 15955  | 83.97  |
| 16:3819175-3819354 | 15644  | 86.91  |
| 16:3820571-3820987 | 46587  | 111.72 |
| 16:3823752-3823931 | 18186  | 101.03 |
| 16:3824570-3824694 | 11196  | 89.57  |

© 2015 American Medical Association. All rights reserved.

|                      |        |        |
|----------------------|--------|--------|
| 16:3827614-3827658   | 8276   | 183.91 |
| 16:3828012-3828183   | 11125  | 64.68  |
| 16:3828701-3828818   | 18344  | 155.46 |
| 16:3830733-3830879   | 8358   | 56.86  |
| 16:3831205-3831307   | 5568   | 54.06  |
| 16:3832685-3832927   | 18982  | 78.12  |
| 16:3841982-3842095   | 24386  | 213.91 |
| 16:3843387-3843627   | 29236  | 121.31 |
| 16:3860604-3860780   | 27329  | 154.4  |
| 16:3900298-3901010   | 56016  | 78.56  |
| 16:3929833-3930121   | 4660   | 16.12  |
| 16:11348700-11349335 | 5496   | 8.64   |
| 16:14014023-14014229 | 7365   | 35.58  |
| 16:14015888-14016068 | 14118  | 78     |
| 16:14020418-14020613 | 39692  | 202.51 |
| 16:14021885-14022092 | 23906  | 114.93 |
| 16:14024567-14024747 | 12064  | 66.65  |
| 16:14026014-14026142 | 12208  | 94.64  |
| 16:14026905-14026923 | 0      | 0      |
| 16:14028049-14028159 | 11788  | 106.2  |
| 16:14029003-14029601 | 45960  | 76.73  |
| 16:14031623-14031715 | 7395   | 79.52  |
| 16:14038580-14038692 | 9007   | 79.71  |
| 16:14041471-14042204 | 88660  | 120.79 |
| 16:23614780-23614990 | 17466  | 82.78  |
| 16:23619185-23619333 | 13963  | 93.71  |
| 16:23625325-23625412 | 4197   | 47.69  |
| 16:23632683-23632799 | 7786   | 66.55  |
| 16:23634290-23634451 | 13071  | 80.69  |
| 16:23635330-23635415 | 6175   | 71.8   |
| 16:23637557-23637718 | 17448  | 107.7  |
| 16:23640525-23640596 | 8584   | 119.22 |
| 16:23640961-23641790 | 61070  | 73.58  |
| 16:23646183-23647655 | 141053 | 95.76  |
| 16:23649171-23649273 | 11336  | 110.06 |
| 16:23649391-23649450 | 10004  | 166.73 |
| 16:23649878-23649913 | 0      | 0      |
| 16:23652431-23652478 | 1004   | 20.92  |
| 16:30127989-30128111 | 5943   | 48.32  |
| 16:30128158-30128324 | 21857  | 130.88 |
| 16:30128458-30128607 | 6886   | 45.91  |

© 2015 American Medical Association. All rights reserved.

|                      |       |        |
|----------------------|-------|--------|
| 16:30128991-30129105 | 14418 | 125.37 |
| 16:30129368-30129484 | 4037  | 34.5   |
| 16:30129670-30129859 | 15299 | 80.52  |
| 16:30133145-30133327 | 5745  | 31.39  |
| 16:30134361-30134530 | 3130  | 18.41  |
| 16:31072389-31073601 | 71663 | 59.08  |
| 16:31075134-31075802 | 17185 | 25.69  |
| 16:31075893-31075939 | 111   | 2.36   |
| 16:50783610-50784113 | 56310 | 111.73 |
| 16:50785515-50785817 | 48211 | 159.11 |
| 16:50788230-50788338 | 11761 | 107.9  |
| 16:50809077-50809085 | 660   | 73.33  |
| 16:50810081-50810188 | 7697  | 71.27  |
| 16:50811736-50811852 | 17477 | 149.38 |
| 16:50813576-50813955 | 96982 | 255.22 |
| 16:50815157-50815322 | 15694 | 94.54  |
| 16:50816236-50816377 | 10841 | 76.35  |
| 16:50818240-50818362 | 12102 | 98.39  |
| 16:50820766-50820857 | 12915 | 140.38 |
| 16:50821697-50821763 | 2133  | 31.84  |
| 16:50825469-50825601 | 13688 | 102.92 |
| 16:50826508-50826616 | 2184  | 20.04  |
| 16:50827457-50827575 | 35580 | 298.99 |
| 16:50828123-50828339 | 46951 | 216.36 |
| 16:50829459-50829514 | 72    | 1.29   |
| 16:50830235-50830419 | 22211 | 120.06 |
| 16:67063311-67063388 | 970   | 12.44  |
| 16:67063630-67063716 | 2659  | 30.56  |
| 16:67070542-67070658 | 16313 | 139.43 |
| 16:67100585-67100701 | 8524  | 72.85  |
| 16:67116116-67116242 | 19350 | 152.36 |
| 16:67132613-67132681 | 15415 | 223.41 |
| 16:68771319-68771366 | 38    | 0.79   |
| 16:68772200-68772314 | 0     | 0      |
| 16:68835573-68835796 | 20273 | 90.5   |
| 16:68842327-68842470 | 7424  | 51.56  |
| 16:68842596-68842751 | 4406  | 28.24  |
| 16:68844100-68844244 | 17851 | 123.11 |
| 16:68845587-68845762 | 13087 | 74.36  |
| 16:68846038-68846166 | 17857 | 138.43 |
| 16:68847216-68847465 | 61448 | 245.79 |

© 2015 American Medical Association. All rights reserved.

|                      |       |        |
|----------------------|-------|--------|
| 16:68849418-68849662 | 25888 | 105.67 |
| 16:68853183-68853328 | 11590 | 79.38  |
| 16:68855904-68856128 | 25002 | 111.12 |
| 16:68857302-68857529 | 15090 | 66.18  |
| 16:68862077-68862207 | 13159 | 100.45 |
| 16:68863557-68863700 | 14531 | 100.91 |
| 16:68867193-68867402 | 13919 | 66.28  |
| 16:68868106-68868184 | 0     | 0      |
| 16:87364894-87365116 | 7154  | 32.08  |
| 16:87367492-87367892 | 21143 | 52.73  |
| 16:87368910-87369063 | 5580  | 36.23  |
| 16:87369761-87369870 | 10946 | 99.51  |
| 16:87376483-87376557 | 1454  | 19.39  |
| 16:87377204-87377371 | 6233  | 37.1   |
| 16:87380780-87380856 | 16278 | 211.4  |
| 16:87393901-87393972 | 5489  | 76.24  |
| 16:87417011-87417350 | 1917  | 5.64   |
| 16:89805009-89805116 | 3437  | 31.82  |
| 16:89805162-89805382 | 5934  | 26.85  |
| 16:89805424-89805697 | 9386  | 34.26  |
| 16:89805886-89805961 | 125   | 1.64   |
| 16:89806402-89806507 | 18863 | 177.95 |
| 16:89807212-89807274 | 1388  | 22.03  |
| 16:89809208-89809346 | 9789  | 70.42  |
| 16:89811367-89811479 | 2197  | 19.44  |
| 16:89812992-89813096 | 3376  | 32.15  |
| 16:89813239-89813298 | 168   | 2.8    |
| 16:89815067-89815175 | 3024  | 27.74  |
| 16:89816138-89816310 | 7700  | 44.51  |
| 16:89818546-89818630 | 23347 | 274.67 |
| 16:89824985-89825113 | 12029 | 93.25  |
| 16:89828357-89828430 | 9426  | 127.38 |
| 16:89829154-89829201 | 0     | 0      |
| 16:89831215-89831474 | 10323 | 39.7   |
| 16:89833549-89833645 | 5541  | 57.12  |
| 16:89836241-89836432 | 7314  | 38.09  |
| 16:89836529-89836667 | 690   | 4.96   |
| 16:89836972-89837042 | 1414  | 19.92  |
| 16:89838086-89838222 | 9009  | 65.76  |
| 16:89839679-89839792 | 147   | 1.29   |
| 16:89842150-89842223 | 1194  | 16.14  |

© 2015 American Medical Association. All rights reserved.

|                      |       |        |
|----------------------|-------|--------|
| 16:89844765-89844870 | 0     | 0      |
| 16:89845209-89845258 | 2452  | 49.04  |
| 16:89845351-89845411 | 3322  | 54.46  |
| 16:89846277-89846365 | 3628  | 40.76  |
| 16:89849267-89849326 | 2443  | 40.72  |
| 16:89849415-89849510 | 5771  | 60.11  |
| 16:89851262-89851372 | 5922  | 53.35  |
| 16:89857811-89857944 | 3830  | 28.58  |
| 16:89858335-89858476 | 6568  | 46.25  |
| 16:89858879-89858955 | 7549  | 98.04  |
| 16:89862314-89862426 | 11014 | 97.47  |
| 16:89865466-89865487 | 3981  | 180.95 |
| 16:89865516-89865640 | 7735  | 61.88  |
| 16:89866013-89866046 | 4101  | 120.62 |
| 16:89869667-89869749 | 7861  | 94.71  |
| 16:89871688-89871800 | 3466  | 30.67  |
| 16:89874702-89874775 | 9816  | 132.65 |
| 16:89877115-89877210 | 7881  | 82.09  |
| 16:89877337-89877479 | 18558 | 129.78 |
| 16:89880928-89881021 | 8633  | 91.84  |
| 16:89882285-89882394 | 7864  | 71.49  |
| 16:89882547-89883023 | 597   | 1.25   |
| 17:7565257-7565332   | 0     | 0      |
| 17:7569524-7569562   | 0     | 0      |
| 17:7572927-7573008   | 10620 | 129.51 |
| 17:7573927-7574033   | 3744  | 34.99  |
| 17:7576537-7576584   | 119   | 2.48   |
| 17:7576625-7576657   | 201   | 6.09   |
| 17:7576853-7576926   | 4601  | 62.18  |
| 17:7577019-7577155   | 4438  | 32.39  |
| 17:7577499-7577608   | 7149  | 64.99  |
| 17:7578138-7578158   | 191   | 9.1    |
| 17:7578177-7578289   | 5156  | 45.63  |
| 17:7578371-7578554   | 10976 | 59.65  |
| 17:7579312-7579590   | 28835 | 103.35 |
| 17:7579700-7579721   | 752   | 34.18  |
| 17:7579839-7579912   | 2866  | 38.73  |
| 17:8108189-8108362   | 7078  | 40.68  |
| 17:8108534-8108708   | 10285 | 58.77  |
| 17:8109809-8109957   | 8062  | 54.11  |
| 17:8110068-8110206   | 4958  | 35.67  |

© 2015 American Medical Association. All rights reserved.

|                      |       |        |
|----------------------|-------|--------|
| 17:8110494-8110688   | 5439  | 27.89  |
| 17:8110889-8110943   | 4529  | 82.35  |
| 17:8111056-8111158   | 3206  | 31.13  |
| 17:8113495-8113542   | 480   | 10     |
| 17:11924204-11924318 | 176   | 1.53   |
| 17:11935583-11935615 | 0     | 0      |
| 17:11958206-11958308 | 8198  | 79.59  |
| 17:11984673-11984847 | 15895 | 90.83  |
| 17:11998770-11998778 | 26    | 2.89   |
| 17:11998892-11999011 | 31057 | 258.81 |
| 17:12011107-12011226 | 25589 | 213.24 |
| 17:12013692-12013743 | 5089  | 97.87  |
| 17:12016550-12016677 | 15074 | 117.77 |
| 17:12028611-12028688 | 16181 | 207.45 |
| 17:12032456-12032604 | 15782 | 105.92 |
| 17:12043156-12043201 | 6687  | 145.37 |
| 17:12044464-12044577 | 20858 | 182.96 |
| 17:17116969-17117170 | 31503 | 155.96 |
| 17:17118299-17118404 | 9125  | 86.08  |
| 17:17118499-17118630 | 27304 | 206.85 |
| 17:17119694-17119817 | 3483  | 28.09  |
| 17:17120383-17120496 | 3852  | 33.79  |
| 17:17122333-17122523 | 15392 | 80.59  |
| 17:17124693-17124942 | 9498  | 37.99  |
| 17:17125815-17125975 | 7018  | 43.59  |
| 17:17127236-17127457 | 7226  | 32.55  |
| 17:17129292-17129636 | 10417 | 30.19  |
| 17:17131203-17131451 | 13672 | 54.91  |
| 17:29422328-29422387 | 8     | 0.13   |
| 17:29483001-29483144 | 7333  | 50.92  |
| 17:29486028-29486111 | 5036  | 59.95  |
| 17:29490204-29490394 | 22926 | 120.03 |
| 17:29496909-29497015 | 11556 | 108    |
| 17:29508440-29508507 | 5168  | 76     |
| 17:29508728-29508803 | 6489  | 85.38  |
| 17:29509526-29509683 | 6140  | 38.86  |
| 17:29527440-29527613 | 27547 | 158.32 |
| 17:29528055-29528177 | 9516  | 77.37  |
| 17:29528429-29528503 | 19295 | 257.27 |
| 17:29533258-29533389 | 37935 | 287.39 |
| 17:29541469-29541603 | 3695  | 27.37  |

© 2015 American Medical Association. All rights reserved.

|                      |       |        |
|----------------------|-------|--------|
| 17:29546023-29546136 | 6054  | 53.11  |
| 17:29548868-29549008 | 6353  | 45.06  |
| 17:29550462-29550585 | 9797  | 79.01  |
| 17:29552113-29552268 | 19578 | 125.5  |
| 17:29553453-29553702 | 67723 | 270.89 |
| 17:29554236-29554309 | 13041 | 176.23 |
| 17:29554541-29554624 | 10067 | 119.85 |
| 17:29556043-29556483 | 73553 | 166.79 |
| 17:29556853-29556992 | 23229 | 165.92 |
| 17:29557278-29557400 | 10744 | 87.35  |
| 17:29557860-29557943 | 6682  | 79.55  |
| 17:29559091-29559207 | 4615  | 39.44  |
| 17:29559718-29559899 | 23416 | 128.66 |
| 17:29560020-29560231 | 40749 | 192.21 |
| 17:29562629-29562790 | 59340 | 366.3  |
| 17:29562936-29563039 | 19763 | 190.03 |
| 17:29576002-29576137 | 30756 | 226.15 |
| 17:29579956-29580018 | 2874  | 45.62  |
| 17:29585362-29585520 | 21438 | 134.83 |
| 17:29586050-29586147 | 4614  | 47.08  |
| 17:29587387-29587533 | 43417 | 295.35 |
| 17:29588729-29588875 | 21509 | 146.32 |
| 17:29592247-29592357 | 9715  | 87.52  |
| 17:29652838-29653270 | 54544 | 125.97 |
| 17:29654517-29654857 | 50745 | 148.81 |
| 17:29657314-29657516 | 17660 | 87     |
| 17:29661856-29662049 | 21074 | 108.63 |
| 17:29663351-29663491 | 19109 | 135.52 |
| 17:29663653-29663932 | 39778 | 142.06 |
| 17:29664386-29664600 | 23615 | 109.84 |
| 17:29664837-29664898 | 5927  | 95.6   |
| 17:29665020-29665157 | 32964 | 238.87 |
| 17:29665722-29665823 | 14703 | 144.15 |
| 17:29667523-29667663 | 14646 | 103.87 |
| 17:29670027-29670153 | 10362 | 81.59  |
| 17:29676138-29676269 | 5374  | 40.71  |
| 17:29677201-29677336 | 13074 | 96.13  |
| 17:29679275-29679432 | 14078 | 89.1   |
| 17:29683478-29683600 | 9268  | 75.35  |
| 17:29683978-29684108 | 30761 | 234.82 |
| 17:29684287-29684387 | 9646  | 95.5   |

© 2015 American Medical Association. All rights reserved.



|                      |        |        |
|----------------------|--------|--------|
| 17:29685498-29685640 | 14749  | 103.14 |
| 17:29685987-29686033 | 2496   | 53.11  |
| 17:29687505-29687721 | 57859  | 266.63 |
| 17:29694243-29694296 | 0      | 0      |
| 17:29701031-29701173 | 10018  | 70.06  |
| 17:29705906-29705949 | 0      | 0      |
| 17:37618325-37619370 | 49599  | 47.42  |
| 17:37627132-37628016 | 111737 | 126.26 |
| 17:37646810-37646986 | 5355   | 30.25  |
| 17:37649004-37649143 | 3936   | 28.11  |
| 17:37650777-37650947 | 4029   | 23.56  |
| 17:37657503-37657692 | 14837  | 78.09  |
| 17:37665958-37666014 | 10137  | 177.84 |
| 17:37667782-37667883 | 8809   | 86.36  |
| 17:37671984-37672061 | 4556   | 58.41  |
| 17:37673693-37673809 | 14808  | 126.56 |
| 17:37676209-37676340 | 21673  | 164.19 |
| 17:37680927-37681138 | 15880  | 74.91  |
| 17:37682117-37682569 | 23024  | 50.83  |
| 17:37686857-37687569 | 80733  | 113.23 |
| 17:37700502-37700530 | 0      | 0      |
| 17:37855813-37855840 | 0      | 0      |
| 17:37856492-37856564 | 56     | 0.77   |
| 17:37863243-37863394 | 8657   | 56.95  |
| 17:37864574-37864787 | 12429  | 58.08  |
| 17:37865571-37865705 | 7999   | 59.25  |
| 17:37866066-37866134 | 4481   | 64.94  |
| 17:37866339-37866454 | 10742  | 92.6   |
| 17:37866593-37866734 | 6781   | 47.75  |
| 17:37868181-37868300 | 19831  | 165.26 |
| 17:37868575-37868701 | 3460   | 27.24  |
| 17:37871539-37871612 | 1372   | 18.54  |
| 17:37871699-37871789 | 6419   | 70.54  |
| 17:37871993-37872192 | 10070  | 50.35  |
| 17:37872554-37872686 | 2711   | 20.38  |
| 17:37872768-37872858 | 3425   | 37.64  |
| 17:37873573-37873737 | 10297  | 62.41  |
| 17:37876040-37876087 | 5642   | 117.54 |
| 17:37879572-37879710 | 8732   | 62.82  |
| 17:37879791-37879913 | 478    | 3.89   |
| 17:37880165-37880263 | 3660   | 36.97  |

© 2015 American Medical Association. All rights reserved.

|                      |        |        |
|----------------------|--------|--------|
| 17:37880979-37881164 | 9684   | 52.06  |
| 17:37881302-37881457 | 10703  | 68.61  |
| 17:37881580-37881655 | 8229   | 108.28 |
| 17:37881960-37882106 | 8393   | 57.1   |
| 17:37882815-37882912 | 5367   | 54.77  |
| 17:37883068-37883256 | 14231  | 75.3   |
| 17:37883548-37883800 | 13975  | 55.24  |
| 17:37883942-37884297 | 14559  | 40.9   |
| 17:38487471-38487648 | 8247   | 46.33  |
| 17:38497642-38497867 | 536    | 2.37   |
| 17:38498957-38499119 | 25905  | 158.93 |
| 17:38504568-38504716 | 16514  | 110.83 |
| 17:38506036-38506177 | 12768  | 89.92  |
| 17:38507654-38507783 | 0      | 0      |
| 17:38508162-38508322 | 1421   | 8.83   |
| 17:38508583-38508759 | 16452  | 92.95  |
| 17:38510554-38510758 | 16456  | 80.27  |
| 17:38511515-38511673 | 1579   | 9.93   |
| 17:38512261-38513016 | 1492   | 1.97   |
| 17:41197695-41197819 | 8444   | 67.55  |
| 17:41199660-41199720 | 5362   | 87.9   |
| 17:41201138-41201211 | 5809   | 78.5   |
| 17:41203080-41203134 | 2578   | 46.87  |
| 17:41209069-41209152 | 16186  | 192.69 |
| 17:41215350-41215390 | 1743   | 42.51  |
| 17:41215891-41215968 | 5772   | 74     |
| 17:41219625-41219712 | 7085   | 80.51  |
| 17:41222945-41223255 | 54045  | 173.78 |
| 17:41226348-41226538 | 15287  | 80.04  |
| 17:41228505-41228631 | 11132  | 87.65  |
| 17:41231351-41231416 | 1738   | 26.33  |
| 17:41234421-41234592 | 30437  | 176.96 |
| 17:41242961-41243049 | 3232   | 36.31  |
| 17:41243452-41246877 | 410179 | 119.73 |
| 17:41247863-41247939 | 3425   | 44.48  |
| 17:41249261-41249306 | 5815   | 126.41 |
| 17:41251792-41251897 | 20921  | 197.37 |
| 17:41256139-41256278 | 15157  | 108.26 |
| 17:41256885-41256973 | 10926  | 122.76 |
| 17:41258473-41258550 | 3235   | 41.47  |
| 17:41262552-41262597 | 0      | 0      |

© 2015 American Medical Association. All rights reserved.

|                      |       |        |
|----------------------|-------|--------|
| 17:41267743-41267796 | 2628  | 48.67  |
| 17:41276034-41276113 | 6902  | 86.28  |
| 17:41605887-41606111 | 7199  | 32     |
| 17:41606503-41606604 | 14215 | 139.36 |
| 17:41606872-41607044 | 13986 | 80.84  |
| 17:41607252-41607320 | 15788 | 228.81 |
| 17:41607475-41607549 | 0     | 0      |
| 17:41610042-41610307 | 21131 | 79.44  |
| 17:41610555-41610716 | 12856 | 79.36  |
| 17:41611227-41611353 | 3689  | 29.05  |
| 17:41613794-41613847 | 9850  | 182.41 |
| 17:41622343-41622390 | 2308  | 48.08  |
| 17:41622642-41622735 | 1126  | 11.98  |
| 17:41622926-41622985 | 141   | 2.35   |
| 17:59760657-59761501 | 88657 | 104.92 |
| 17:59763197-59763526 | 43576 | 132.05 |
| 17:59770791-59770873 | 5724  | 68.96  |
| 17:59793312-59793424 | 6843  | 60.56  |
| 17:59820374-59820495 | 9565  | 78.4   |
| 17:59821793-59821952 | 27177 | 169.86 |
| 17:59853762-59853923 | 28539 | 176.17 |
| 17:59857622-59857762 | 16297 | 115.58 |
| 17:59858201-59858366 | 18465 | 111.23 |
| 17:59861631-59861785 | 30051 | 193.88 |
| 17:59870958-59871090 | 2467  | 18.55  |
| 17:59876461-59876660 | 18033 | 90.17  |
| 17:59878614-59878835 | 39105 | 176.15 |
| 17:59885828-59886118 | 37119 | 127.56 |
| 17:59924462-59924581 | 11502 | 95.85  |
| 17:59926490-59926617 | 13574 | 106.05 |
| 17:59934419-59934592 | 30654 | 176.17 |
| 17:59937157-59937268 | 15229 | 135.97 |
| 17:59938808-59938900 | 9029  | 97.09  |
| 17:62006586-62006684 | 6933  | 70.03  |
| 17:62006794-62006835 | 2677  | 63.74  |
| 17:62007130-62007248 | 4392  | 36.91  |
| 17:62007434-62007745 | 8802  | 28.21  |
| 17:62008695-62008748 | 2439  | 45.17  |
| 17:62009555-62009621 | 2793  | 41.69  |
| 17:66511541-66511717 | 9342  | 52.78  |
| 17:66518897-66519067 | 15614 | 91.31  |

© 2015 American Medical Association. All rights reserved.

|                      |       |        |
|----------------------|-------|--------|
| 17:66519866-66519957 | 7361  | 80.01  |
| 17:66520157-66520218 | 8673  | 139.89 |
| 17:66521053-66521099 | 9348  | 198.89 |
| 17:66521895-66522053 | 28356 | 178.34 |
| 17:66523981-66524041 | 6827  | 111.92 |
| 17:66525011-66525132 | 18381 | 150.66 |
| 17:66526061-66526142 | 17645 | 215.18 |
| 17:66526418-66526590 | 47472 | 274.4  |
| 17:78519430-78519591 | 7960  | 49.14  |
| 17:78599491-78599593 | 17912 | 173.9  |
| 17:78617528-78617610 | 2721  | 32.78  |
| 17:78681641-78681799 | 2795  | 17.58  |
| 17:78704360-78704506 | 17324 | 117.85 |
| 17:78727810-78727985 | 45973 | 261.21 |
| 17:78765250-78765309 | 3742  | 62.37  |
| 17:78796001-78796101 | 26211 | 259.51 |
| 17:78796879-78797023 | 15394 | 106.17 |
| 17:78811722-78811797 | 1299  | 17.09  |
| 17:78820273-78820374 | 15298 | 149.98 |
| 17:78829264-78829347 | 7448  | 88.67  |
| 17:78831590-78831736 | 8039  | 54.69  |
| 17:78854215-78854289 | 5323  | 70.97  |
| 17:78857219-78857284 | 5453  | 82.62  |
| 17:78857581-78857772 | 9937  | 51.76  |
| 17:78858808-78858948 | 1422  | 10.09  |
| 17:78865520-78865637 | 14457 | 122.52 |
| 17:78866529-78866669 | 16624 | 117.9  |
| 17:78867507-78867665 | 10580 | 66.54  |
| 17:78882611-78882729 | 17923 | 150.61 |
| 17:78896524-78896627 | 794   | 7.63   |
| 17:78897290-78897473 | 6397  | 34.77  |
| 17:78899170-78899280 | 5468  | 49.26  |
| 17:78914296-78914401 | 1899  | 17.92  |
| 17:78919467-78919581 | 6599  | 57.38  |
| 17:78921027-78921151 | 5172  | 41.38  |
| 17:78923243-78923347 | 14512 | 138.21 |
| 17:78931424-78931530 | 9844  | 92     |
| 17:78933878-78934005 | 6152  | 48.06  |
| 17:78935194-78935280 | 231   | 2.66   |
| 17:78936261-78936377 | 6487  | 55.44  |
| 17:78936728-78936857 | 5017  | 38.59  |

© 2015 American Medical Association. All rights reserved.

|                      |       |        |
|----------------------|-------|--------|
| 17:78938062-78938130 | 4789  | 69.41  |
| 18:19751106-19752240 | 8925  | 7.86   |
| 18:19756916-19757082 | 862   | 5.16   |
| 18:19761414-19761539 | 21400 | 169.84 |
| 18:19762718-19762805 | 1664  | 18.91  |
| 18:19762901-19763004 | 17354 | 166.87 |
| 18:19780619-19780786 | 16285 | 96.93  |
| 18:45368198-45368321 | 10886 | 87.79  |
| 18:45371711-45371855 | 27008 | 186.26 |
| 18:45372034-45372171 | 20873 | 151.25 |
| 18:45374846-45375058 | 27241 | 127.89 |
| 18:45377645-45377698 | 7528  | 139.41 |
| 18:45391430-45391504 | 4559  | 60.79  |
| 18:45394694-45394828 | 15116 | 111.97 |
| 18:45395614-45395807 | 10146 | 52.3   |
| 18:45396846-45396935 | 19538 | 217.09 |
| 18:45422892-45423127 | 26743 | 113.32 |
| 18:48573417-48573665 | 26403 | 106.04 |
| 18:48575056-48575230 | 21664 | 123.79 |
| 18:48575665-48575694 | 1871  | 62.37  |
| 18:48577724-48577785 | 0     | 0      |
| 18:48579005-48579022 | 0     | 0      |
| 18:48581151-48581363 | 63163 | 296.54 |
| 18:48584495-48584614 | 12759 | 106.33 |
| 18:48584710-48584826 | 21066 | 180.05 |
| 18:48586236-48586286 | 5144  | 100.86 |
| 18:48591793-48591976 | 20369 | 110.7  |
| 18:48593389-48593557 | 21587 | 127.73 |
| 18:48603008-48603146 | 5492  | 39.51  |
| 18:48604626-48604837 | 24147 | 113.9  |
| 18:52895456-52895592 | 16334 | 119.23 |
| 18:52896078-52896307 | 34324 | 149.23 |
| 18:52899740-52899902 | 13282 | 81.48  |
| 18:52901779-52901914 | 14253 | 104.8  |
| 18:52921728-52921931 | 12642 | 61.97  |
| 18:52924546-52924622 | 11714 | 152.13 |
| 18:52927180-52927258 | 14147 | 179.08 |
| 18:52928697-52928764 | 31612 | 464.88 |
| 18:52937062-52937194 | 19095 | 143.57 |
| 18:52942850-52942983 | 46411 | 346.35 |
| 18:52946782-52946905 | 16999 | 137.09 |

© 2015 American Medical Association. All rights reserved.

|                      |       |        |
|----------------------|-------|--------|
| 18:52969647-52969715 | 0     | 0      |
| 18:52988901-52988969 | 0     | 0      |
| 18:53017590-53017639 | 4148  | 82.96  |
| 18:53018105-53018234 | 13168 | 101.29 |
| 18:53070685-53070749 | 12411 | 190.94 |
| 18:53070852-53070945 | 134   | 1.43   |
| 18:53128250-53128346 | 5646  | 58.21  |
| 18:53131307-53131368 | 8893  | 143.44 |
| 18:53177810-53177828 | 0     | 0      |
| 18:53252511-53252583 | 11132 | 152.49 |
| 18:53254276-53254367 | 9804  | 106.57 |
| 18:53263337-53263457 | 0     | 0      |
| 18:53298529-53298619 | 0     | 0      |
| 18:53302934-53303128 | 885   | 4.54   |
| 18:53331906-53331989 | 0     | 0      |
| 18:60795858-60795992 | 5759  | 42.66  |
| 18:60985282-60985899 | 42952 | 69.5   |
| 19:1206913-1207202   | 5929  | 20.44  |
| 19:1218416-1218499   | 9450  | 112.5  |
| 19:1219323-1219412   | 1410  | 15.67  |
| 19:1220372-1220504   | 1665  | 12.52  |
| 19:1220580-1220716   | 1824  | 13.31  |
| 19:1221212-1221339   | 2523  | 19.71  |
| 19:1221948-1222005   | 110   | 1.9    |
| 19:1222984-1223171   | 1677  | 8.92   |
| 19:1226453-1226646   | 1247  | 6.43   |
| 19:3094650-3094785   | 1461  | 10.74  |
| 19:3110147-3110331   | 3635  | 19.65  |
| 19:3113328-3113482   | 5143  | 33.18  |
| 19:3114942-3115070   | 18157 | 140.75 |
| 19:3118922-3119051   | 11490 | 88.38  |
| 19:3119204-3119357   | 11840 | 76.88  |
| 19:3120987-3121177   | 5963  | 31.22  |
| 19:4090596-4090706   | 107   | 0.96   |
| 19:4094451-4094496   | 75    | 1.63   |
| 19:4095386-4095447   | 76    | 1.23   |
| 19:4097277-4097341   | 2238  | 34.43  |
| 19:4099199-4099412   | 1739  | 8.13   |
| 19:4101017-4101141   | 644   | 5.15   |
| 19:4101227-4101278   | 178   | 3.42   |
| 19:4102374-4102451   | 377   | 4.83   |

© 2015 American Medical Association. All rights reserved.

|                      |       |        |
|----------------------|-------|--------|
| 19:4110507-4110653   | 7565  | 51.46  |
| 19:4117417-4117627   | 7094  | 33.62  |
| 19:4123781-4123872   | 388   | 4.22   |
| 19:10244343-10244377 | 492   | 14.06  |
| 19:10244893-10244983 | 4108  | 45.14  |
| 19:10246412-10246528 | 582   | 4.97   |
| 19:10246797-10246963 | 5123  | 30.68  |
| 19:10247752-10247956 | 2870  | 14     |
| 19:10248508-10248685 | 3587  | 20.15  |
| 19:10249115-10249281 | 11429 | 68.44  |
| 19:10250352-10250493 | 2767  | 19.49  |
| 19:10250722-10251004 | 12695 | 44.86  |
| 19:10251457-10251585 | 7894  | 61.19  |
| 19:10251781-10251865 | 6896  | 81.13  |
| 19:10252704-10252896 | 7826  | 40.55  |
| 19:10254442-10254663 | 32717 | 147.37 |
| 19:10257027-10257200 | 5091  | 29.26  |
| 19:10259560-10259693 | 11711 | 87.4   |
| 19:10260129-10260333 | 57510 | 280.54 |
| 19:10260529-10260644 | 11242 | 96.91  |
| 19:10262074-10262221 | 15215 | 102.8  |
| 19:10262426-10262523 | 10906 | 111.29 |
| 19:10264969-10265155 | 18193 | 97.29  |
| 19:10265262-10265449 | 9593  | 51.03  |
| 19:10265581-10265732 | 13739 | 90.39  |
| 19:10266529-10266621 | 1597  | 17.17  |
| 19:10267067-10267185 | 9877  | 83     |
| 19:10270334-10270443 | 9564  | 86.95  |
| 19:10270518-10270598 | 14986 | 185.01 |
| 19:10270694-10270739 | 3194  | 69.43  |
| 19:10271060-10271094 | 1987  | 56.77  |
| 19:10273343-10273424 | 3046  | 37.15  |
| 19:10274002-10274036 | 5036  | 143.89 |
| 19:10277274-10277361 | 5684  | 64.59  |
| 19:10279006-10279040 | 885   | 25.29  |
| 19:10283766-10283850 | 3024  | 35.58  |
| 19:10284547-10284581 | 3804  | 108.69 |
| 19:10286216-10286294 | 5249  | 66.44  |
| 19:10287968-10288043 | 3889  | 51.17  |
| 19:10289305-10289353 | 0     | 0      |
| 19:10290863-10290910 | 48    | 1      |

© 2015 American Medical Association. All rights reserved.

|                      |       |        |
|----------------------|-------|--------|
| 19:10291026-10291245 | 16801 | 76.37  |
| 19:10291454-10291561 | 6977  | 64.6   |
| 19:10292717-10292753 | 2376  | 64.22  |
| 19:10305496-10305575 | 2137  | 26.71  |
| 19:10597328-10597494 | 21111 | 126.41 |
| 19:10599868-10600044 | 6204  | 35.05  |
| 19:10600324-10600529 | 17709 | 85.97  |
| 19:10602253-10602938 | 21729 | 31.67  |
| 19:10610071-10610709 | 35878 | 56.15  |
| 19:11094828-11095049 | 3803  | 17.13  |
| 19:11095949-11096081 | 7408  | 55.7   |
| 19:11096865-11097269 | 6185  | 15.27  |
| 19:11097581-11097679 | 5008  | 50.59  |
| 19:11098342-11098600 | 6495  | 25.08  |
| 19:11099993-11100119 | 9775  | 76.97  |
| 19:11101826-11101999 | 2601  | 14.95  |
| 19:11105504-11105677 | 4498  | 25.85  |
| 19:11105793-11105889 | 0     | 0      |
| 19:11106019-11106061 | 6     | 0.14   |
| 19:11106180-11106219 | 0     | 0      |
| 19:11106591-11106602 | 0     | 0      |
| 19:11106889-11107056 | 10217 | 60.82  |
| 19:11107170-11107220 | 4807  | 94.25  |
| 19:11113705-11113835 | 14575 | 111.26 |
| 19:11114016-11114073 | 5011  | 86.4   |
| 19:11118578-11118699 | 3483  | 28.55  |
| 19:11121057-11121207 | 19423 | 128.63 |
| 19:11123625-11123788 | 9637  | 58.76  |
| 19:11129633-11129699 | 7878  | 117.58 |
| 19:11130267-11130377 | 3832  | 34.52  |
| 19:11132401-11132643 | 11984 | 49.32  |
| 19:11134194-11134307 | 2345  | 20.57  |
| 19:11135007-11135114 | 6446  | 59.69  |
| 19:11136098-11136184 | 8327  | 95.71  |
| 19:11136976-11137022 | 3001  | 63.85  |
| 19:11138460-11138626 | 31870 | 190.84 |
| 19:11141406-11141569 | 3341  | 20.37  |
| 19:11143966-11144193 | 25930 | 113.73 |
| 19:11144443-11144541 | 4734  | 47.82  |
| 19:11144799-11144876 | 9950  | 127.56 |
| 19:11145590-11145808 | 3373  | 15.4   |

© 2015 American Medical Association. All rights reserved.



|                      |       |        |
|----------------------|-------|--------|
| 19:11150134-11150229 | 2613  | 27.22  |
| 19:11151974-11152236 | 12854 | 48.87  |
| 19:11168931-11169039 | 7183  | 65.9   |
| 19:11169464-11169565 | 4877  | 47.81  |
| 19:11170429-11170561 | 3767  | 28.32  |
| 19:11170721-11170863 | 22    | 0.15   |
| 19:11172460-11172492 | 3615  | 109.55 |
| 19:15271473-15272525 | 17680 | 16.79  |
| 19:15273276-15273373 | 5440  | 55.51  |
| 19:15276179-15276326 | 9094  | 61.45  |
| 19:15276598-15276902 | 11862 | 38.89  |
| 19:15278060-15278222 | 15008 | 92.07  |
| 19:15280897-15280981 | 1025  | 12.06  |
| 19:15281142-15281364 | 5896  | 26.44  |
| 19:15281482-15281636 | 1360  | 8.77   |
| 19:15284879-15285211 | 4489  | 13.48  |
| 19:15288336-15288901 | 1538  | 2.72   |
| 19:15289634-15289752 | 1998  | 16.79  |
| 19:15289836-15290093 | 5144  | 19.94  |
| 19:15290175-15290307 | 5985  | 45     |
| 19:15290883-15291067 | 14857 | 80.31  |
| 19:15291492-15291639 | 912   | 6.16   |
| 19:15291772-15291973 | 1739  | 8.61   |
| 19:15292387-15292612 | 755   | 3.34   |
| 19:15295106-15295261 | 8423  | 53.99  |
| 19:15295717-15295830 | 66    | 0.58   |
| 19:15296068-15296219 | 2879  | 18.94  |
| 19:15296298-15296490 | 8325  | 43.13  |
| 19:15297689-15297799 | 5676  | 51.14  |
| 19:15297916-15298149 | 5736  | 24.51  |
| 19:15298692-15298805 | 142   | 1.25   |
| 19:15299046-15299159 | 1143  | 10.03  |
| 19:15299800-15299985 | 6906  | 37.13  |
| 19:15300084-15300239 | 14052 | 90.08  |
| 19:15302235-15302468 | 7289  | 31.15  |
| 19:15302556-15302678 | 6125  | 49.8   |
| 19:15302771-15303109 | 6557  | 19.34  |
| 19:15303188-15303330 | 2296  | 16.06  |
| 19:15308311-15308389 | 2923  | 37     |
| 19:15311599-15311722 | 178   | 1.44   |
| 19:17937552-17937719 | 13424 | 79.9   |

© 2015 American Medical Association. All rights reserved.

|                      |       |        |
|----------------------|-------|--------|
| 19:17940839-17941027 | 1118  | 5.92   |
| 19:17941312-17941429 | 3525  | 29.87  |
| 19:17942037-17942209 | 17693 | 102.27 |
| 19:17942483-17942607 | 1270  | 10.16  |
| 19:17943328-17943517 | 17742 | 93.38  |
| 19:17943599-17943738 | 10462 | 74.73  |
| 19:17945380-17945530 | 6941  | 45.97  |
| 19:17945661-17945812 | 8777  | 57.74  |
| 19:17945892-17946024 | 5816  | 43.73  |
| 19:17946733-17946860 | 5627  | 43.96  |
| 19:17947864-17948022 | 2087  | 13.13  |
| 19:17948741-17948872 | 15816 | 119.82 |
| 19:17949072-17949199 | 16312 | 127.44 |
| 19:17950286-17950472 | 1644  | 8.79   |
| 19:17951039-17951150 | 2459  | 21.96  |
| 19:17952198-17952355 | 472   | 2.99   |
| 19:17952449-17952571 | 7052  | 57.33  |
| 19:17953125-17953419 | 1758  | 5.96   |
| 19:17953836-17953981 | 3204  | 21.95  |
| 19:17954189-17954300 | 881   | 7.87   |
| 19:17954586-17954709 | 5382  | 43.4   |
| 19:17955043-17955226 | 800   | 4.35   |
| 19:30303463-30303485 | 42    | 1.83   |
| 19:30303596-30303683 | 336   | 3.82   |
| 19:30303876-30303944 | 3554  | 51.51  |
| 19:30308044-30308189 | 10854 | 74.34  |
| 19:30308313-30308466 | 19806 | 128.61 |
| 19:30311609-30311755 | 5677  | 38.62  |
| 19:30312629-30312724 | 3631  | 37.82  |
| 19:30312903-30313037 | 11057 | 81.9   |
| 19:30313147-30313258 | 15614 | 139.41 |
| 19:30313353-30313510 | 22230 | 140.7  |
| 19:30314562-30314684 | 4675  | 38.01  |
| 19:33792244-33793320 | 8705  | 8.08   |
| 19:40739476-40739596 | 2634  | 21.77  |
| 19:40739779-40739858 | 4908  | 61.35  |
| 19:40740952-40741054 | 5699  | 55.33  |
| 19:40741170-40741257 | 7951  | 90.35  |
| 19:40741797-40742011 | 10979 | 51.07  |
| 19:40742164-40742292 | 4753  | 36.84  |
| 19:40743876-40743998 | 1873  | 15.23  |

© 2015 American Medical Association. All rights reserved.

|                      |       |        |
|----------------------|-------|--------|
| 19:40744812-40744880 | 5501  | 79.72  |
| 19:40745724-40746017 | 19227 | 65.4   |
| 19:40746169-40746201 | 177   | 5.36   |
| 19:40747845-40747976 | 7588  | 57.48  |
| 19:40748441-40748594 | 13563 | 88.07  |
| 19:40761064-40761176 | 14162 | 125.33 |
| 19:40762833-40762961 | 5682  | 44.05  |
| 19:40771125-40771174 | 801   | 16.02  |
| 19:41725298-41725382 | 624   | 7.34   |
| 19:41726541-41726763 | 4475  | 20.07  |
| 19:41727051-41727151 | 8023  | 79.44  |
| 19:41727785-41727961 | 2060  | 11.64  |
| 19:41736872-41736952 | 11815 | 145.86 |
| 19:41737088-41737203 | 7170  | 61.81  |
| 19:41743849-41744059 | 23640 | 112.04 |
| 19:41744375-41744514 | 2703  | 19.31  |
| 19:41745069-41745219 | 8884  | 58.83  |
| 19:41745599-41745625 | 8746  | 323.93 |
| 19:41748788-41748920 | 7827  | 58.85  |
| 19:41749521-41749612 | 15197 | 165.18 |
| 19:41754419-41754514 | 7760  | 80.83  |
| 19:41754648-41754725 | 2817  | 36.12  |
| 19:41758256-41758348 | 7122  | 76.58  |
| 19:41758751-41758872 | 7250  | 59.43  |
| 19:41759504-41759613 | 4110  | 37.36  |
| 19:41762357-41762516 | 24349 | 152.18 |
| 19:41763398-41763534 | 14286 | 104.28 |
| 19:41765458-41765809 | 16201 | 46.03  |
| 19:42381375-42381453 | 6480  | 82.03  |
| 19:42383060-42383359 | 14433 | 48.11  |
| 19:42383605-42383723 | 1704  | 14.32  |
| 19:42384737-42384805 | 51    | 0.74   |
| 19:42384934-42385047 | 293   | 2.57   |
| 19:42788857-42788923 | 90    | 1.34   |
| 19:42790923-42791072 | 6701  | 44.67  |
| 19:42791158-42791392 | 10007 | 42.58  |
| 19:42791472-42791601 | 10537 | 81.05  |
| 19:42791697-42791879 | 12773 | 69.8   |
| 19:42791962-42792127 | 2723  | 16.4   |
| 19:42793040-42793242 | 13802 | 67.99  |
| 19:42793333-42793558 | 8383  | 37.09  |

© 2015 American Medical Association. All rights reserved.

|                      |       |        |
|----------------------|-------|--------|
| 19:42794000-42794103 | 2073  | 19.93  |
| 19:42794385-42795618 | 38157 | 30.92  |
| 19:42795710-42795897 | 18903 | 100.55 |
| 19:42796238-42796359 | 6441  | 52.8   |
| 19:42796452-42796618 | 9251  | 55.4   |
| 19:42796718-42797011 | 18789 | 63.91  |
| 19:42797108-42797433 | 4565  | 14     |
| 19:42797744-42797988 | 6108  | 24.93  |
| 19:42798087-42798241 | 10118 | 65.28  |
| 19:42798325-42798456 | 8081  | 61.22  |
| 19:42798756-42798887 | 4688  | 35.52  |
| 19:42798976-42799343 | 10933 | 29.71  |
| 19:45281189-45281541 | 3268  | 9.26   |
| 19:45284162-45284308 | 7756  | 52.76  |
| 19:45284464-45284620 | 12972 | 82.62  |
| 19:45285627-45285748 | 9165  | 75.12  |
| 19:45287521-45287658 | 9031  | 65.44  |
| 19:45293261-45293348 | 12533 | 142.42 |
| 19:45295640-45295771 | 6204  | 47     |
| 19:45296731-45296877 | 2117  | 14.4   |
| 19:45297461-45297538 | 8927  | 114.45 |
| 19:45303638-45303700 | 1362  | 21.62  |
| 19:45854887-45854979 | 8863  | 95.3   |
| 19:45855467-45855610 | 6147  | 42.69  |
| 19:45855764-45855907 | 4127  | 28.66  |
| 19:45856004-45856074 | 4869  | 68.58  |
| 19:45856341-45856413 | 4008  | 54.9   |
| 19:45856500-45856592 | 1644  | 17.68  |
| 19:45857988-45858109 | 10511 | 86.16  |
| 19:45858923-45858986 | 2544  | 39.75  |
| 19:45860528-45860629 | 3203  | 31.4   |
| 19:45860732-45860801 | 2778  | 39.69  |
| 19:45860888-45860957 | 3722  | 53.17  |
| 19:45862118-45862170 | 1207  | 22.77  |
| 19:45864782-45864900 | 5836  | 49.04  |
| 19:45867001-45867169 | 631   | 3.73   |
| 19:45867244-45867377 | 942   | 7.03   |
| 19:45867493-45867589 | 3452  | 35.59  |
| 19:45867682-45867805 | 3124  | 25.19  |
| 19:45868096-45868212 | 2180  | 18.63  |
| 19:45868300-45868416 | 4019  | 34.35  |

© 2015 American Medical Association. All rights reserved.

|                      |       |        |
|----------------------|-------|--------|
| 19:45871888-45872001 | 1181  | 10.36  |
| 19:45872188-45872250 | 7085  | 112.46 |
| 19:45872328-45872405 | 10521 | 134.88 |
| 19:45873391-45873490 | 2811  | 28.11  |
| 19:45873794-45873798 | 50    | 10     |
| 19:52693350-52693547 | 454   | 2.29   |
| 19:52705197-52705287 | 3926  | 43.14  |
| 19:52709216-52709316 | 10458 | 103.54 |
| 19:52714513-52714745 | 14246 | 61.14  |
| 19:52715939-52716086 | 14343 | 96.91  |
| 19:52716208-52716363 | 4471  | 28.66  |
| 19:52719032-52719146 | 7911  | 68.79  |
| 19:52719257-52719327 | 7348  | 103.49 |
| 19:52719782-52719916 | 10890 | 80.67  |
| 19:52722944-52723117 | 16622 | 95.53  |
| 19:52723442-52723502 | 6262  | 102.66 |
| 19:52724232-52724386 | 18836 | 121.52 |
| 19:52725352-52725494 | 5489  | 38.38  |
| 19:52728970-52729061 | 8990  | 97.72  |
| 19:52729218-52729234 | 1888  | 111.06 |
| 19:55481384-55481663 | 15511 | 55.4   |
| 19:55485417-55485492 | 345   | 4.54   |
| 19:55485868-55485912 | 646   | 14.36  |
| 19:55488228-55488232 | 0     | 0      |
| 19:55489120-55489191 | 4479  | 62.21  |
| 19:55492985-55493050 | 3605  | 54.62  |
| 19:55493530-55495096 | 67130 | 42.84  |
| 19:55496415-55496585 | 18191 | 106.38 |
| 19:55497519-55497683 | 10651 | 64.55  |
| 19:55501390-55501560 | 12874 | 75.29  |
| 19:55501583-55501664 | 1036  | 12.63  |
| 19:55501870-55502040 | 11679 | 68.3   |
| 19:55505637-55505807 | 14415 | 84.3   |
| 19:55508685-55508855 | 22750 | 133.04 |
| 19:55512128-55512266 | 9223  | 66.35  |
| 20:30946579-30946635 | 107   | 1.88   |
| 20:30947111-30947137 | 0     | 0      |
| 20:30947550-30947594 | 0     | 0      |
| 20:30954187-30954270 | 12382 | 147.4  |
| 20:30955530-30955532 | 331   | 110.33 |
| 20:30956815-30956926 | 11925 | 106.47 |

© 2015 American Medical Association. All rights reserved.

|                      |        |        |
|----------------------|--------|--------|
| 20:30959581-30959586 | 0      | 0      |
| 20:30959967-30959972 | 0      | 0      |
| 20:31015931-31016051 | 12029  | 99.41  |
| 20:31016128-31016225 | 15190  | 155    |
| 20:31017141-31017234 | 4576   | 48.68  |
| 20:31017704-31017856 | 4808   | 31.42  |
| 20:31018946-31018979 | 41     | 1.21   |
| 20:31019124-31019287 | 24581  | 149.88 |
| 20:31019386-31019482 | 6275   | 64.69  |
| 20:31020683-31020788 | 4786   | 45.15  |
| 20:31021087-31021720 | 73786  | 116.38 |
| 20:31022235-31025141 | 254220 | 87.45  |
| 20:36012557-36012806 | 2180   | 8.72   |
| 20:36014478-36014577 | 17025  | 170.25 |
| 20:36014863-36014880 | 0      | 0      |
| 20:36022298-36022396 | 3606   | 36.42  |
| 20:36022577-36022680 | 9082   | 87.33  |
| 20:36024565-36024714 | 9751   | 65.01  |
| 20:36026102-36026257 | 4213   | 27.01  |
| 20:36028518-36028697 | 4546   | 25.26  |
| 20:36030005-36030081 | 5436   | 70.6   |
| 20:36030838-36030991 | 6166   | 40.04  |
| 20:36031152-36031283 | 7440   | 56.36  |
| 20:36031574-36031782 | 1372   | 6.56   |
| 20:39657708-39657740 | 157    | 4.76   |
| 20:39658071-39658095 | 911    | 36.44  |
| 20:39690034-39690130 | 2829   | 29.16  |
| 20:39704811-39704934 | 4317   | 34.81  |
| 20:39706222-39706277 | 5425   | 96.88  |
| 20:39708725-39708820 | 4403   | 45.86  |
| 20:39709805-39709880 | 1799   | 23.67  |
| 20:39713102-39713208 | 424    | 3.96   |
| 20:39721112-39721227 | 11040  | 95.17  |
| 20:39725860-39725981 | 10988  | 90.07  |
| 20:39726855-39726977 | 9968   | 81.04  |
| 20:39728696-39728883 | 13397  | 71.26  |
| 20:39729849-39729993 | 13647  | 94.12  |
| 20:39741422-39741565 | 8990   | 62.43  |
| 20:39742610-39742795 | 30353  | 163.19 |
| 20:39744011-39744079 | 7670   | 111.16 |
| 20:39744918-39745032 | 9359   | 81.38  |

© 2015 American Medical Association. All rights reserved.

|                      |       |        |
|----------------------|-------|--------|
| 20:39746809-39746936 | 11210 | 87.58  |
| 20:39750336-39750430 | 24480 | 257.68 |
| 20:39750646-39750795 | 15976 | 106.51 |
| 20:39751835-39751937 | 6765  | 65.68  |
| 20:54945214-54945396 | 24912 | 136.13 |
| 20:54945526-54945715 | 10048 | 52.88  |
| 20:54948464-54948612 | 14878 | 99.85  |
| 20:54956489-54956627 | 11921 | 85.76  |
| 20:54958041-54958232 | 23869 | 124.32 |
| 20:54959326-54959380 | 2212  | 40.22  |
| 20:54961313-54961589 | 41211 | 148.78 |
| 20:54963212-54963253 | 3608  | 85.9   |
| 20:57415162-57415899 | 31475 | 42.65  |
| 20:57428321-57430388 | 20536 | 9.93   |
| 20:57430609-57430703 | 0     | 0      |
| 20:57466782-57466920 | 5230  | 37.63  |
| 20:57470667-57470739 | 4788  | 65.59  |
| 20:57473996-57474040 | 6398  | 142.18 |
| 20:57475004-57475010 | 0     | 0      |
| 20:57478583-57478640 | 4148  | 71.52  |
| 20:57478727-57478846 | 40972 | 341.43 |
| 20:57480438-57480535 | 12200 | 124.49 |
| 20:57484217-57484271 | 23401 | 425.47 |
| 20:57484405-57484478 | 5593  | 75.58  |
| 20:57484576-57484634 | 4008  | 67.93  |
| 20:57484739-57484859 | 11386 | 94.1   |
| 20:57485006-57485136 | 32460 | 247.79 |
| 20:57485389-57485456 | 7203  | 105.93 |
| 20:57485738-57485884 | 10667 | 72.56  |
| 21:36164276-36164373 | 0     | 0      |
| 21:36164432-36164907 | 1880  | 3.95   |
| 21:36171598-36171759 | 27971 | 172.66 |
| 21:36193965-36193993 | 289   | 9.97   |
| 21:36206707-36206898 | 31875 | 166.02 |
| 21:36228710-36228744 | 2763  | 78.94  |
| 21:36231771-36231875 | 27096 | 258.06 |
| 21:36252854-36253010 | 15600 | 99.36  |
| 21:36259140-36259409 | 15593 | 57.75  |
| 21:36261974-36262034 | 0     | 0      |
| 21:36265222-36265260 | 2026  | 51.95  |
| 21:36421139-36421196 | 19851 | 342.26 |

© 2015 American Medical Association. All rights reserved.

|                      |       |        |
|----------------------|-------|--------|
| 21:39755325-39755845 | 46830 | 89.88  |
| 21:39762917-39762964 | 10650 | 221.88 |
| 21:39763581-39763637 | 6185  | 108.51 |
| 21:39764239-39764366 | 595   | 4.65   |
| 21:39772496-39772567 | 9039  | 125.54 |
| 21:39774479-39774559 | 6470  | 79.88  |
| 21:39775428-39775631 | 22479 | 110.19 |
| 21:39795332-39795483 | 13141 | 86.45  |
| 21:39817327-39817544 | 12801 | 58.72  |
| 21:39870287-39870304 | 1513  | 84.06  |
| 21:39947586-39947624 | 2594  | 66.51  |
| 22:21272223-21272533 | 17050 | 54.82  |
| 22:21288067-21288532 | 40692 | 87.32  |
| 22:21303999-21304133 | 28533 | 211.36 |
| 22:22123493-22123609 | 8837  | 75.53  |
| 22:22127162-22127271 | 15171 | 137.92 |
| 22:22142546-22142677 | 6730  | 50.98  |
| 22:22142983-22143097 | 6949  | 60.43  |
| 22:22153301-22153417 | 6635  | 56.71  |
| 22:22160139-22160328 | 38116 | 200.61 |
| 22:22161953-22162135 | 16034 | 87.62  |
| 22:22221612-22221730 | 220   | 1.85   |
| 22:24129357-24129449 | 3455  | 37.15  |
| 22:24133943-24134081 | 12130 | 87.27  |
| 22:24135746-24135875 | 20844 | 160.34 |
| 22:24143131-24143322 | 12349 | 64.32  |
| 22:24145482-24145609 | 15680 | 122.5  |
| 22:24158957-24159123 | 14218 | 85.14  |
| 22:24167412-24167602 | 13898 | 72.76  |
| 22:24175759-24175890 | 13911 | 105.39 |
| 22:24176328-24176367 | 459   | 11.48  |
| 22:29083885-29083974 | 3509  | 38.99  |
| 22:29085123-29085203 | 6138  | 75.78  |
| 22:29085253-29085254 | 163   | 81.5   |
| 22:29090020-29090105 | 18357 | 213.45 |
| 22:29091115-29091230 | 10637 | 91.7   |
| 22:29091698-29091861 | 8157  | 49.74  |
| 22:29092886-29092975 | 6484  | 72.04  |
| 22:29095826-29095925 | 15668 | 156.68 |
| 22:29099493-29099554 | 349   | 5.63   |
| 22:29105994-29106047 | 2046  | 37.89  |

© 2015 American Medical Association. All rights reserved.



|                      |       |        |
|----------------------|-------|--------|
| 22:29107897-29108005 | 9928  | 91.08  |
| 22:29115383-29115473 | 2243  | 24.65  |
| 22:29117588-29117619 | 0     | 0      |
| 22:29120870-29120911 | 681   | 16.21  |
| 22:29120965-29121112 | 8631  | 58.32  |
| 22:29121231-29121355 | 20949 | 167.59 |
| 22:29125309-29125364 | 0     | 0      |
| 22:29126408-29126536 | 0     | 0      |
| 22:29130391-29130715 | 22135 | 68.11  |
| 22:29133248-29133271 | 0     | 0      |
| 22:29664326-29664338 | 1337  | 102.85 |
| 22:29668205-29668241 | 2730  | 73.78  |
| 22:29668369-29668420 | 9296  | 178.77 |
| 22:29669727-29669853 | 10376 | 81.7   |
| 22:29670254-29670271 | 2853  | 158.5  |
| 22:29674019-29674205 | 12834 | 68.63  |
| 22:29678379-29678546 | 12274 | 73.06  |
| 22:29682912-29683123 | 20286 | 95.69  |
| 22:29684595-29684775 | 10102 | 55.81  |
| 22:29686402-29686492 | 2746  | 30.18  |
| 22:29687551-29687588 | 1015  | 26.71  |
| 22:29688126-29688158 | 5275  | 159.85 |
| 22:29688477-29688595 | 18527 | 155.69 |
| 22:29692229-29692358 | 8012  | 61.63  |
| 22:29693817-29693939 | 6304  | 51.25  |
| 22:29694723-29694885 | 7681  | 47.12  |
| 22:29695185-29695321 | 16707 | 121.95 |
| 22:29695589-29695841 | 6231  | 24.63  |
| 22:29696112-29696151 | 3633  | 90.83  |
| 22:29999988-30000101 | 1018  | 8.93   |
| 22:30032740-30032865 | 8767  | 69.58  |
| 22:30035079-30035201 | 10406 | 84.6   |
| 22:30038191-30038274 | 2503  | 29.8   |
| 22:30050646-30050714 | 13936 | 201.97 |
| 22:30051583-30051665 | 8113  | 97.75  |
| 22:30054178-30054253 | 7653  | 100.7  |
| 22:30057194-30057328 | 17914 | 132.7  |
| 22:30060979-30061053 | 2584  | 34.45  |
| 22:30064322-30064435 | 5913  | 51.87  |
| 22:30067815-30067937 | 6446  | 52.41  |
| 22:30069258-30069475 | 1780  | 8.17   |

© 2015 American Medical Association. All rights reserved.

|                      |        |        |
|----------------------|--------|--------|
| 22:30070825-30070930 | 316    | 2.98   |
| 22:30074185-30074312 | 12078  | 94.36  |
| 22:30077428-30077590 | 13179  | 80.85  |
| 22:30078968-30079053 | 11537  | 134.15 |
| 22:30090741-30090798 | 1259   | 21.71  |
| 22:41489009-41489102 | 6839   | 72.76  |
| 22:41513191-41513825 | 54650  | 86.06  |
| 22:41521868-41522044 | 18472  | 104.36 |
| 22:41523491-41523752 | 39349  | 150.19 |
| 22:41525894-41526007 | 19445  | 170.57 |
| 22:41527392-41527637 | 26900  | 109.35 |
| 22:41531817-41531910 | 8520   | 90.64  |
| 22:41533657-41533794 | 19127  | 138.6  |
| 22:41536144-41536261 | 20102  | 170.36 |
| 22:41537052-41537226 | 12281  | 70.18  |
| 22:41542743-41542820 | 9633   | 123.5  |
| 22:41543841-41543950 | 14101  | 128.19 |
| 22:41545042-41545179 | 17916  | 129.83 |
| 22:41545765-41546202 | 26742  | 61.05  |
| 22:41547837-41548016 | 32136  | 178.53 |
| 22:41548210-41548354 | 6068   | 41.85  |
| 22:41550999-41551117 | 25009  | 210.16 |
| 22:41553173-41553412 | 25529  | 106.37 |
| 22:41554416-41554504 | 6453   | 72.51  |
| 22:41556646-41556726 | 10265  | 126.73 |
| 22:41558727-41558783 | 4041   | 70.89  |
| 22:41560057-41560134 | 16857  | 216.12 |
| 22:41562603-41562670 | 3668   | 53.94  |
| 22:41564453-41564603 | 17768  | 117.67 |
| 22:41564725-41564871 | 21172  | 144.03 |
| 22:41565507-41565620 | 11664  | 102.32 |
| 22:41566410-41566575 | 17451  | 105.13 |
| 22:41568503-41568667 | 6554   | 39.72  |
| 22:41569627-41569788 | 16088  | 99.31  |
| 22:41572251-41572532 | 36168  | 128.26 |
| 22:41572777-41574960 | 176892 | 80.99  |
| X:1314890-1315014    | 2188   | 17.5   |
| X:1317419-1317581    | 15352  | 94.18  |
| X:1317790-1318008    | 0      | 0      |
| X:1321272-1321405    | 12713  | 94.87  |
| X:1325326-1325492    | 16844  | 100.86 |

© 2015 American Medical Association. All rights reserved.

|                     |       |        |
|---------------------|-------|--------|
| X:1327699-1327801   | 13913 | 135.08 |
| X:1331449-1331527   | 2553  | 32.32  |
| X:14861689-14862103 | 27504 | 66.27  |
| X:14862625-14862862 | 17004 | 71.45  |
| X:14862978-14863408 | 38064 | 88.32  |
| X:14868627-14868796 | 11745 | 69.09  |
| X:14871161-14871289 | 5740  | 44.5   |
| X:14875984-14876076 | 14401 | 154.85 |
| X:14877304-14877456 | 4206  | 27.49  |
| X:14882682-14883632 | 47606 | 50.06  |
| X:44732798-44732958 | 732   | 4.55   |
| X:44733170-44733233 | 1191  | 18.61  |
| X:44820529-44820637 | 1547  | 14.19  |
| X:44833911-44833960 | 5263  | 105.26 |
| X:44870206-44870264 | 1571  | 26.63  |
| X:44879855-44879975 | 9361  | 77.36  |
| X:44894176-44894230 | 4640  | 84.36  |
| X:44896900-44896934 | 2177  | 62.2   |
| X:44910954-44911047 | 2446  | 26.02  |
| X:44913074-44913200 | 9868  | 77.7   |
| X:44918251-44918349 | 7844  | 79.23  |
| X:44918492-44918711 | 8270  | 37.59  |
| X:44919267-44919401 | 2386  | 17.67  |
| X:44919854-44920009 | 0     | 0      |
| X:44920569-44920664 | 3989  | 41.55  |
| X:44921892-44921993 | 5492  | 53.84  |
| X:44922667-44923062 | 16010 | 40.43  |
| X:44928824-44929602 | 20232 | 25.97  |
| X:44935942-44936071 | 12314 | 94.72  |
| X:44937645-44937750 | 5633  | 53.14  |
| X:44938391-44938596 | 9382  | 45.54  |
| X:44941821-44941885 | 2043  | 31.43  |
| X:44941960-44942034 | 2440  | 32.53  |
| X:44942705-44942853 | 7611  | 51.08  |
| X:44945110-44945224 | 4598  | 39.98  |
| X:44948988-44949175 | 11002 | 58.52  |
| X:44949968-44950109 | 4965  | 34.96  |
| X:44965787-44965894 | 0     | 0      |
| X:44966655-44966781 | 9720  | 76.54  |
| X:44969324-44969494 | 10371 | 60.65  |
| X:44970627-44970656 | 2139  | 71.3   |

© 2015 American Medical Association. All rights reserved.

|                     |      |       |
|---------------------|------|-------|
| X:47422367-47422462 | 960  | 10    |
| X:47422625-47422728 | 3274 | 31.48 |
| X:47424196-47424298 | 985  | 9.56  |
| X:47424384-47424538 | 4479 | 28.9  |
| X:47424651-47424753 | 4957 | 48.13 |
| X:47426038-47426179 | 4743 | 33.4  |
| X:47426283-47426310 | 1796 | 64.14 |
| X:47426385-47426530 | 3008 | 20.6  |
| X:47426629-47426831 | 3111 | 15.33 |
| X:47428117-47428293 | 5684 | 32.11 |
| X:47428386-47428432 | 777  | 16.53 |
| X:47428938-47429056 | 1601 | 13.45 |
| X:47429292-47429423 | 1033 | 7.83  |
| X:47430277-47430411 | 1684 | 12.47 |
| X:47430722-47430856 | 2897 | 21.46 |
| X:48542243-48542374 | 5817 | 44.07 |
| X:48542672-48542812 | 2721 | 19.3  |
| X:48543936-48544022 | 1613 | 18.54 |
| X:48544123-48544225 | 513  | 4.98  |
| X:48544335-48544376 | 1303 | 31.02 |
| X:48544470-48544523 | 1908 | 35.33 |
| X:48545170-48545344 | 2518 | 14.39 |
| X:48546443-48546485 | 714  | 16.6  |
| X:48546689-48546842 | 1776 | 11.53 |
| X:48547049-48547455 | 5715 | 14.04 |
| X:48547709-48547823 | 1269 | 11.03 |
| X:48549498-48549553 | 2422 | 43.25 |
| X:48649517-48649736 | 1020 | 4.64  |
| X:48650251-48650628 | 9343 | 24.72 |
| X:48650730-48650875 | 1927 | 13.2  |
| X:48651579-48651704 | 3896 | 30.92 |
| X:48652200-48652675 | 5314 | 11.16 |
| X:53221926-53222019 | 0    | 0     |
| X:53222149-53222514 | 4350 | 11.89 |
| X:53222619-53222818 | 7553 | 37.77 |
| X:53222955-53223033 | 3277 | 41.48 |
| X:53223321-53223920 | 7388 | 12.31 |
| X:53224113-53224250 | 1641 | 11.89 |
| X:53224413-53224592 | 2064 | 11.47 |
| X:53225098-53225236 | 1889 | 13.59 |
| X:53225868-53226226 | 4946 | 13.78 |

© 2015 American Medical Association. All rights reserved.

|                     |       |        |
|---------------------|-------|--------|
| X:53226953-53227058 | 540   | 5.09   |
| X:53227672-53227819 | 1460  | 9.86   |
| X:53227946-53228070 | 10253 | 82.02  |
| X:53228159-53228340 | 10466 | 57.51  |
| X:53230732-53230926 | 5533  | 28.37  |
| X:53231036-53231155 | 6349  | 52.91  |
| X:53239596-53239758 | 7790  | 47.79  |
| X:53239858-53240039 | 6326  | 34.76  |
| X:53240679-53240837 | 5062  | 31.84  |
| X:53240969-53241088 | 1535  | 12.79  |
| X:53243871-53244029 | 4531  | 28.5   |
| X:53244977-53245158 | 7764  | 42.66  |
| X:53245256-53245379 | 4558  | 36.76  |
| X:53246325-53246459 | 4321  | 32.01  |
| X:53246978-53247148 | 6329  | 37.01  |
| X:53247458-53247580 | 2955  | 24.02  |
| X:53247823-53247894 | 0     | 0      |
| X:53250021-53250098 | 3852  | 49.38  |
| X:53250901-53250975 | 46    | 0.61   |
| X:53253922-53254071 | 2862  | 19.08  |
| X:63405997-63406054 | 3391  | 58.47  |
| X:63409759-63413166 | 91782 | 26.93  |
| X:66764989-66766608 | 27087 | 16.72  |
| X:66788845-66788864 | 1875  | 93.75  |
| X:66863098-66863249 | 6009  | 39.53  |
| X:66900562-66900596 | 0     | 0      |
| X:66905852-66905968 | 6349  | 54.26  |
| X:66914515-66914564 | 0     | 0      |
| X:66931244-66931531 | 8058  | 27.98  |
| X:66937320-66937464 | 3407  | 23.5   |
| X:66941675-66941805 | 8711  | 66.5   |
| X:66942645-66942826 | 4846  | 26.63  |
| X:66943528-66943683 | 19676 | 126.13 |
| X:70338605-70338703 | 471   | 4.76   |
| X:70339189-70339327 | 966   | 6.95   |
| X:70339536-70339727 | 3298  | 17.18  |
| X:70339864-70340020 | 11743 | 74.8   |
| X:70340821-70341002 | 13028 | 71.58  |
| X:70341177-70341287 | 10325 | 93.02  |
| X:70341412-70341666 | 15129 | 59.33  |
| X:70342050-70342196 | 19267 | 131.07 |

© 2015 American Medical Association. All rights reserved.

|                     |       |        |
|---------------------|-------|--------|
| X:70342358-70342457 | 3286  | 32.86  |
| X:70342588-70342724 | 7314  | 53.39  |
| X:70342945-70343076 | 10262 | 77.74  |
| X:70343444-70343570 | 1344  | 10.58  |
| X:70344009-70344238 | 6713  | 29.19  |
| X:70344614-70344694 | 1081  | 13.35  |
| X:70344826-70344996 | 10080 | 58.95  |
| X:70345201-70345345 | 3849  | 26.54  |
| X:70345513-70345563 | 3524  | 69.1   |
| X:70345886-70346004 | 12596 | 105.85 |
| X:70346191-70346334 | 15789 | 109.65 |
| X:70346819-70346982 | 5023  | 30.63  |
| X:70347186-70347317 | 4081  | 30.92  |
| X:70347743-70347970 | 7752  | 34     |
| X:70348146-70348290 | 14334 | 98.86  |
| X:70348448-70348568 | 3461  | 28.6   |
| X:70348964-70349065 | 6059  | 59.4   |
| X:70349166-70349279 | 3882  | 34.05  |
| X:70349530-70349705 | 3362  | 19.1   |
| X:70349885-70350064 | 2551  | 14.17  |
| X:70351400-70351471 | 2413  | 33.51  |
| X:70351923-70352056 | 5092  | 38     |
| X:70352227-70352388 | 2521  | 15.56  |
| X:70352695-70352806 | 138   | 1.23   |
| X:70352973-70353062 | 5740  | 63.78  |
| X:70354207-70354316 | 246   | 2.24   |
| X:70354563-70354698 | 6759  | 49.7   |
| X:70354942-70355103 | 3945  | 24.35  |
| X:70356131-70356505 | 5659  | 15.09  |
| X:70356729-70356879 | 2981  | 19.74  |
| X:70357037-70357242 | 4445  | 21.58  |
| X:70357408-70357485 | 1447  | 18.55  |
| X:70357555-70357793 | 9860  | 41.26  |
| X:70360485-70360707 | 8736  | 39.17  |
| X:70361080-70361220 | 152   | 1.08   |
| X:70361733-70361814 | 1953  | 23.82  |
| X:70362025-70362068 | 3207  | 72.89  |
| X:76763829-76764107 | 36741 | 131.69 |
| X:76776266-76776394 | 3093  | 23.98  |
| X:76776881-76776976 | 6075  | 63.28  |
| X:76777741-76777866 | 12656 | 100.44 |

© 2015 American Medical Association. All rights reserved.

|                       |        |        |
|-----------------------|--------|--------|
| X:76778730-76778879   | 11458  | 76.39  |
| X:76812922-76813116   | 12916  | 66.24  |
| X:76814140-76814317   | 12423  | 69.79  |
| X:76829715-76829823   | 15859  | 145.5  |
| X:76845304-76845410   | 3185   | 29.77  |
| X:76849166-76849319   | 8866   | 57.57  |
| X:76854880-76855049   | 41111  | 241.83 |
| X:76855201-76855289   | 3222   | 36.2   |
| X:76855903-76856033   | 18894  | 144.23 |
| X:76871930-76871979   | 321    | 6.42   |
| X:76872081-76872198   | 9996   | 84.71  |
| X:76874274-76874449   | 15633  | 88.82  |
| X:76875863-76876000   | 5554   | 40.25  |
| X:76888695-76888872   | 32887  | 184.76 |
| X:76889054-76889200   | 6410   | 43.61  |
| X:76890085-76890194   | 12901  | 117.28 |
| X:76891406-76891547   | 3909   | 27.53  |
| X:76907604-76907843   | 22143  | 92.26  |
| X:76909588-76909690   | 5636   | 54.72  |
| X:76912050-76912143   | 4347   | 46.24  |
| X:76918871-76919047   | 4375   | 24.72  |
| X:76920134-76920267   | 4289   | 32.01  |
| X:76931721-76931793   | 7792   | 106.74 |
| X:76937012-76940085   | 378324 | 123.07 |
| X:76940431-76940498   | 9070   | 133.38 |
| X:76944311-76944420   | 9969   | 90.63  |
| X:76949299-76949426   | 6564   | 51.28  |
| X:76952065-76952192   | 9155   | 71.52  |
| X:76953071-76953123   | 3824   | 72.15  |
| X:76954062-76954119   | 2033   | 35.05  |
| X:76954362-76954375   | 0      | 0      |
| X:76972608-76972720   | 11636  | 102.97 |
| X:77041468-77041487   | 58     | 2.9    |
| X:132670152-132670321 | 12724  | 74.85  |
| X:132730460-132730627 | 15710  | 93.51  |
| X:132795758-132795878 | 6720   | 55.54  |
| X:132826397-132826522 | 9381   | 74.45  |
| X:132833923-132834056 | 9980   | 74.48  |
| X:132838233-132838301 | 109    | 1.58   |
| X:132887509-132888203 | 110603 | 159.14 |
| X:133087077-133087238 | 23722  | 146.43 |

© 2015 American Medical Association. All rights reserved.

|                       |       |       |
|-----------------------|-------|-------|
| X:133119302-133119476 | 1159  | 6.62  |
| X:133511648-133511785 | 6845  | 49.6  |
| X:133512035-133512136 | 6799  | 66.66 |
| X:133527531-133527664 | 12228 | 91.25 |
| X:133527939-133527982 | 2090  | 47.5  |
| X:133547518-133547687 | 10124 | 59.55 |
| X:133547853-133547996 | 11453 | 79.53 |
| X:133549046-133549252 | 10958 | 52.94 |
| X:133551199-133551336 | 7097  | 51.43 |
| X:133559231-133559360 | 8287  | 63.75 |

This table provides mean coverage for each coding interval covered by the exome bait design. Data was generated using DepthOfCoverage<sup>9</sup>.



## eReferences

1. Amin W, Kang HP, Egloff AM, et al. An informatics supported web-based data annotation and query tool to expedite translational research for head and neck malignancies. *BMC cancer* 2009;9:396.
2. Cibulskis K, McKenna A, Fennell T, Banks E, DePristo M, Getz G. ContEst: estimating cross-contamination of human samples in next-generation sequencing data. *Bioinformatics* 2011;27:2601-2.
3. Cibulskis K, Lawrence MS, Carter SL, et al. Sensitive detection of somatic point mutations in impure and heterogeneous cancer samples. *Nature biotechnology* 2013.
4. Chiang DY, Getz G, Jaffe DB, et al. High-resolution mapping of copy-number alterations with massively parallel sequencing. *Nature methods* 2009;6:99-103.
5. Olshen AB, Venkatraman ES, Lucito R, Wigler M. Circular binary segmentation for the analysis of array-based DNA copy number data. *Biostatistics* 2004;5:557-72.
6. Van Allen EM, Wagle N, Stojanov P, et al. Whole-exome sequencing and clinical interpretation of formalin-fixed, paraffin-embedded tumor samples to guide precision cancer medicine. *Nature medicine* 2014;20:682-8.
7. Robinson JT, Thorvaldsdottir H, Winckler W, et al. Integrative genomics viewer. *Nature biotechnology* 2011;29:24-6.
8. Linardou H, Dahabreh IJ, Bafaloukos D, Kosmidis P, Murray S. Somatic EGFR mutations and efficacy of tyrosine kinase inhibitors in NSCLC. *Nature reviews Clinical oncology* 2009;6:352-66.
9. McKenna A, Hanna M, Banks E, et al. The Genome Analysis Toolkit: a MapReduce framework for analyzing next-generation DNA sequencing data. *Genome research* 2010;20:1297-303.
